# Supplementary material for: Fuzhuan brick tea ameliorates hepatic steatosis and steatohepatitis through gut microbiota-derived aryl hydrocarbon receptor ligands in high-fat diet-induced obese mice
Source: Royal Society of Chemistry journal article supplement (doi:10.1039/d3fo01782f), 2023-01-01

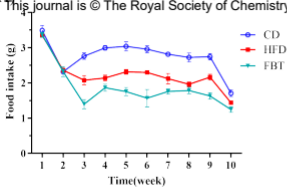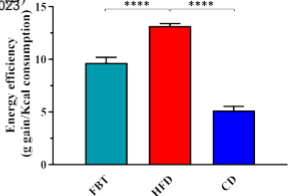

Supplementary Figure 1. The cumulative food intake (A) and energy efficiency (body weight gain per kcal of food consumption) (B) of mice in different groups.

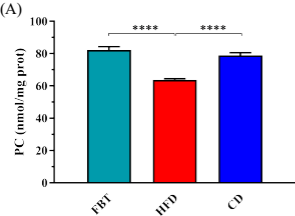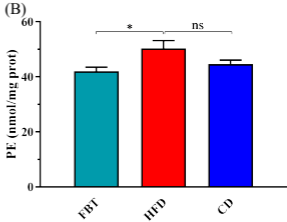

Supplementary Figure 2. The hepatic levels of PC (A) and PE (B) in mice.

*Lactobacillus reuteri*

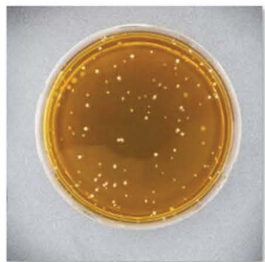

0 µg/mL

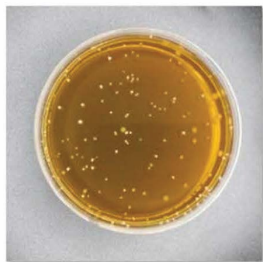

16 µg/mL

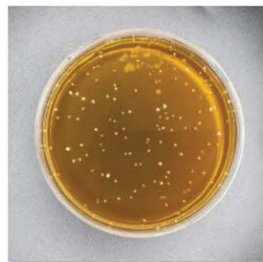

18 µg/mL

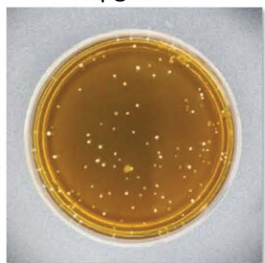

20 µg/mL

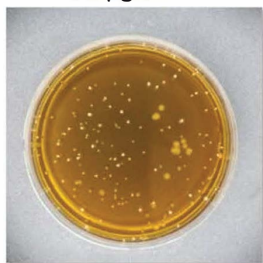

22 µg/mL

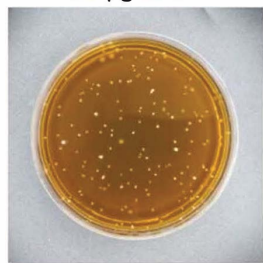

24 µg/mL

*Lactobacillus johnsonii*

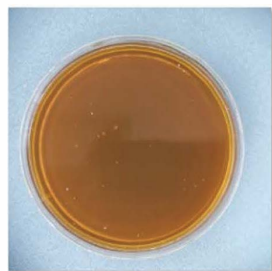

0 µg/mL

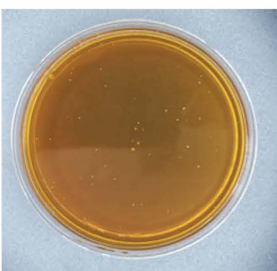

16 µg/mL

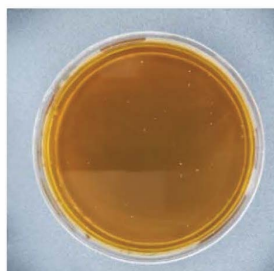

18 µg/mL

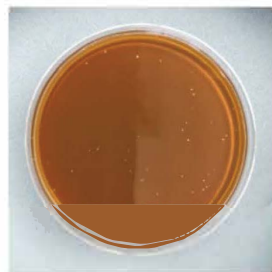

20 µg/mL

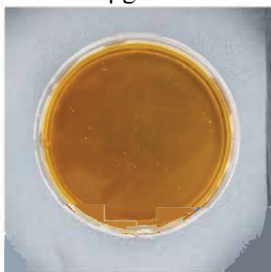

22 µg/mL

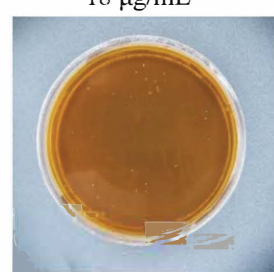

24 µg/mL

Supplementary Figure 3. The proliferation effects of FBT on *Lactobacillus reuteri* and *Lactobacillus johnsonii* in vitro.

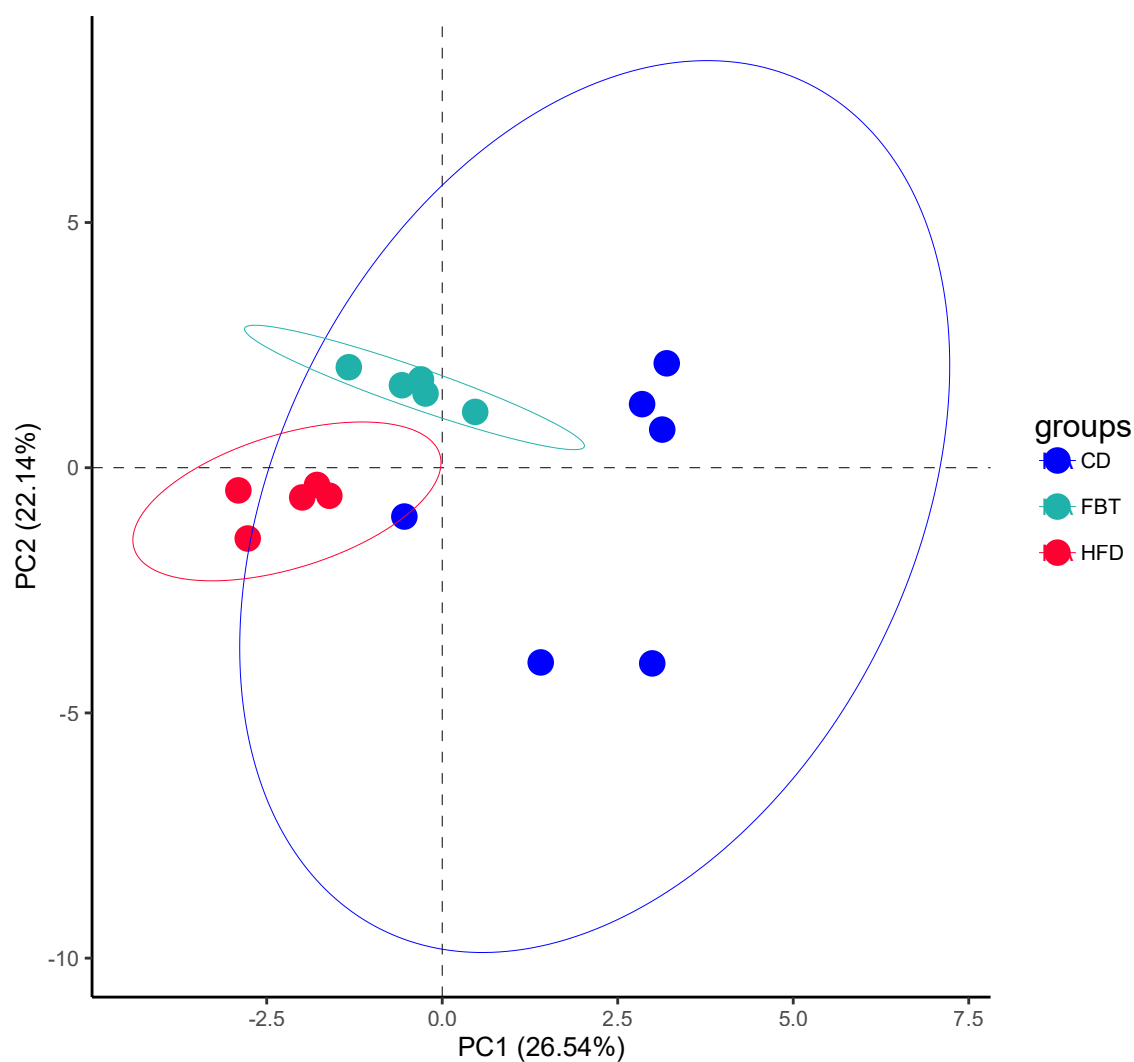

Supplementary Figure 4. The different profiles of the cecal tryptophan metabolites showing in principal component analysis (PCA).

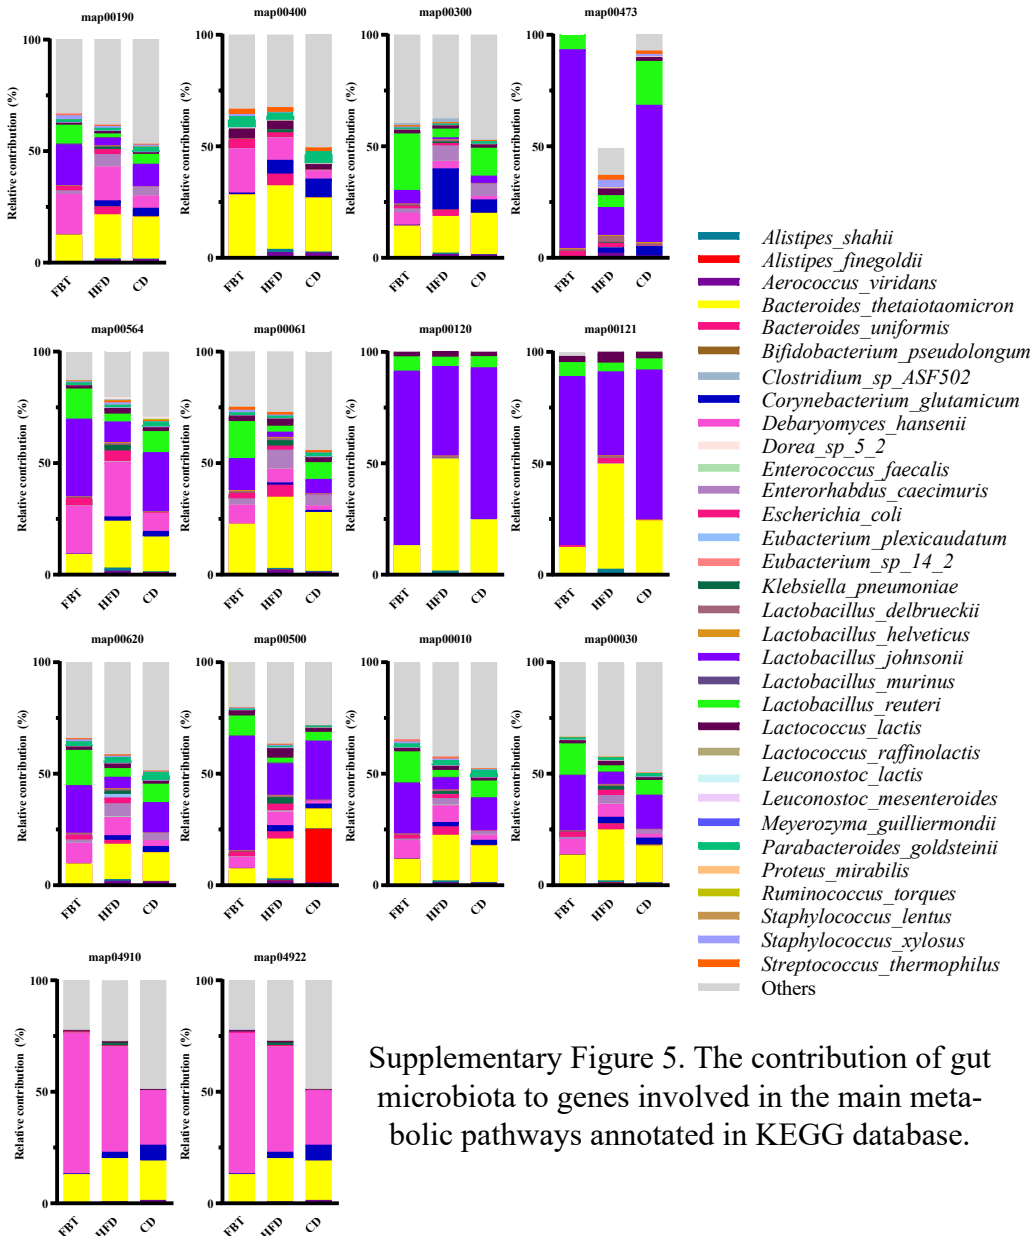

Supplement: d3fo01782f1.pdf [file d3fo01782f1.pdf]
