# Supplementary material for: Fuzhuan brick tea ameliorates hepatic steatosis and steatohepatitis through gut microbiota-derived aryl hydrocarbon receptor ligands in high-fat diet-induced obese mice
Source: Royal Society of Chemistry journal article supplement (doi:10.1039/d3fo01782f), 2023-01-01
Supplement: d3fo01782f2.pdf [file d3fo01782f2.pdf]

**Fuzhuan brick tea ameliorates hepatic steatosis and steatohepatitis by gut  
microbiota-derived aryl hydrocarbon receptor ligands in high-fat diet-induced  
obese mice**

Dongmin Liu<sup>a, b</sup>, Siyu Wang<sup>a</sup>, Yaqing Liu<sup>a</sup>, Yong Luo<sup>b, c</sup>, Beibei Wen<sup>b, c</sup>, Wenliang Wu<sup>b, d</sup>, Hongliang  
Zeng<sup>e</sup>, Jianan Huang<sup>b, c, \*</sup>, Zhonghua Liu<sup>b, c, \*</sup>

<sup>a</sup>Changsha University of Science & Technology, Changsha 410114, China

<sup>b</sup> Key Laboratory of Ministry of Education for Tea Science, Hunan Agricultural University, Changsha  
410128, China

<sup>c</sup>National Research Center of Engineering Technology for Utilization of Botanical Functional Ingredients,  
Changsha 410128, China

<sup>d</sup>Tea Research Institute, Hunan Academy of Agricultural Sciences, Changsha 410125, China

<sup>e</sup>Research Institute of Chinese Medicine, Hunan Academy of Chinese Medicine, Changsha, Hunan  
410013, China

---

\* Corresponding authors.

*E-mail addresses:* [jian7513@sina.com](mailto:jian7513@sina.com) (J. Huang), [larkin-liu@163.com](mailto:larkin-liu@163.com) (Z. Liu).

## Supplementary Tables

**Supplementary Table 1. Tentatively Identified Compounds in the FBT Through MS/MS and/ or Authentic Standards.**

| No. | Identified Components                                                                                             | Formula   | Observed m/z | Mass error (mDa) | Observed RT (min) | Adducts | Response |
|-----|-------------------------------------------------------------------------------------------------------------------|-----------|--------------|------------------|-------------------|---------|----------|
| 1   | Quercetin 3-O-Rha-galactoside                                                                                     | C16H14O9  | 349.0573     | 0.8              | 4.43              | -H      | 3336879  |
| 2   | Quercetin-3-O-robinobioside                                                                                       | C16H14O9  | 349.0573     | 0.8              | 4.43              | -H      | 3336879  |
| 3   | Aspartic acid                                                                                                     | C27H30O15 | 593.1511     | -0.1             | 4.54              | -H      | 630209   |
| 4   | 4,4'-methylenebis[1,2,3-benzenetriol]                                                                             | C27H30O15 | 593.1511     | -0.1             | 4.54              | -H      | 630209   |
| 5   | Nonanal                                                                                                           | C27H30O15 | 593.1511     | -0.1             | 4.54              | -H      | 630209   |
| 6   | Phytol                                                                                                            | C26H28O14 | 609.1461     | 0                | 5.7               | +HCOO   | 624295   |
| 7   | EA-gallate-(4 $\beta$ →6)-ECG                                                                                     | C26H28O14 | 609.1461     | 0                | 5.62              | +HCOO   | 565018   |
| 8   | (-)-EGC 3-O-(3-O-Me)-gallate                                                                                      | C27H30O16 | 609.1461     | 0                | 5.62              | -H      | 565018   |
| 9   | (-)-EGC 3-O-cinnamate                                                                                             | C27H30O16 | 609.1461     | 0                | 5.62              | -H      | 565018   |
| 10  | Sinapic acid                                                                                                      | C27H30O16 | 609.1461     | 0                | 5.62              | -H      | 565018   |
| 11  | Homoveratric acid                                                                                                 | C27H30O16 | 609.1461     | 0                | 5.62              | -H      | 565018   |
| 12  | Ferulic acid                                                                                                      | C26H28O14 | 609.1461     | 0                | 5.62              | +HCOO   | 565018   |
| 13  | Isoferulic acid                                                                                                   | C26H28O14 | 609.1461     | 0                | 5.62              | +HCOO   | 565018   |
| 14  | Isoschaftoside                                                                                                    | C27H30O14 | 577.1561     | -0.2             | 5.61              | -H      | 520384   |
| 15  | Taxifolin                                                                                                         | C27H30O14 | 577.1561     | -0.2             | 5.61              | -H      | 520384   |
| 16  | 2-phenylpropanal                                                                                                  | C41H44O21 | 871.2306     | 0.3              | 9.34              | -H      | 481241   |
| 17  | (7R, 8S)dihydrodehydrodiconiferyl alcohol                                                                         | C26H32O13 | 597.183      | 0.5              | 5.92              | +HCOO   | 374447   |
| 18  | 2,5-Dihydroxyphenylacetic acid                                                                                    | C15H14O8  | 321.061      | -0.6             | 3.9               | -H      | 368771   |
| 19  | Salicifoliol                                                                                                      | C21H23NO  | 416.1344     | -0.7             | 4.95              | -H      | 308855   |
| 20  | 3',4',7-triOH-5-OMe-flavone-7-O- $\beta$ -D-glucoside                                                             | C21H23NO  | 416.1344     | -0.7             | 4.95              | -H      | 308855   |
| 21  | 5"-R-ethylpyrrolidinonyl catechin                                                                                 | C21H23NO  | 416.1344     | -0.7             | 4.95              | -H      | 308855   |
| 22  | 5"-R-ethylpyrrolidinonyl EC                                                                                       | C21H23NO  | 416.1344     | -0.7             | 4.95              | -H      | 308855   |
| 23  | 5"-S-ethylpyrrolidinonyl catechin                                                                                 | C21H23NO  | 416.1344     | -0.7             | 4.95              | -H      | 308855   |
| 24  | 5"-S-ethylpyrrolidinonyl EC                                                                                       | C21H23NO  | 416.1344     | -0.7             | 4.95              | -H      | 308855   |
| 25  | Puerin I                                                                                                          | C21H23NO  | 416.1344     | -0.7             | 4.95              | -H      | 308855   |
| 26  | Puerin II                                                                                                         | C21H23NO  | 416.1344     | -0.7             | 4.95              | -H      | 308855   |
| 27  | Catechin-7-O- $\beta$ -D-glucoside                                                                                | C33H40O20 | 755.2044     | 0.4              | 5.56              | -H      | 280940   |
| 28  | Procyanidin C1                                                                                                    | C33H40O20 | 755.2044     | 0.4              | 5.56              | -H      | 280940   |
| 29  | Epitheflavic acid                                                                                                 | C33H40O20 | 755.2044     | 0.4              | 5.56              | -H      | 280940   |
| 30  | Theaflavic acid                                                                                                   | C33H40O20 | 755.2044     | 0.4              | 5.56              | -H      | 280940   |
| 31  | (+)-catechin-8-C- $\beta$ -D-glucoside                                                                            | C33H40O20 | 755.2044     | 0.4              | 5.56              | -H      | 280940   |
| 32  | Epicatechin 8-C-glucoside                                                                                         | C33H40O20 | 755.2044     | 0.4              | 5.56              | -H      | 280940   |
| 33  | Kaempferol-3-O-[ $\alpha$ -L-Rha-(1→3)-(4"-O-acetyl)- $\beta$ -L-Rha-(1→6)- $\beta$ -D-Glc-(1→2)- $\beta$ -D-Glc] | C33H40O20 | 755.2044     | 0.4              | 5.56              | -H      | 280940   |
| 34  | Alanine                                                                                                           | C14H12O6  | 275.0553     | -0.8             | 6.21              | -H      | 270862   |

|    |                                                                                             |           |          |      |      |       |        |
|----|---------------------------------------------------------------------------------------------|-----------|----------|------|------|-------|--------|
| 35 | Benzoic acid                                                                                | C14H12O6  | 275.0553 | -0.8 | 6.21 | -H    | 270862 |
| 36 | (-)-EC 3-O-p-OH-benzoate                                                                    | C16H14O8  | 333.0609 | -0.7 | 5.32 | -H    | 269786 |
| 37 | Theaflavate B                                                                               | C36H28O15 | 745.1418 | 0.8  | 4.45 | +HCOO | 246704 |
| 38 | EGC-(4 $\beta$ →8)-EGC                                                                      | C37H30O17 | 745.1418 | 0.8  | 4.45 | -H    | 246704 |
| 39 | GC-(4 $\alpha$ →8)-catechin-3-O-gallate                                                     | C37H30O17 | 745.1418 | 0.8  | 4.45 | -H    | 246704 |
| 40 | Catechin-(4 $\alpha$ →8)-EGCG                                                               | C37H30O17 | 745.1418 | 0.8  | 4.45 | -H    | 246704 |
| 41 | EC-(4 $\beta$ →8)-EGCG                                                                      | C37H30O17 | 745.1418 | 0.8  | 4.45 | -H    | 246704 |
| 42 | 2"-O- $\beta$ -D-Glu-vitexin                                                                | C21H20O10 | 431.098  | -0.4 | 5.84 | -H    | 217441 |
| 43 | (-)-Epigallocatechin                                                                        | C21H20O10 | 431.098  | -0.4 | 5.84 | -H    | 217441 |
| 44 | (+)-Gallocatechin                                                                           | C21H20O10 | 431.098  | -0.4 | 5.84 | -H    | 217441 |
| 45 | Pheophorbide A                                                                              | C29H24O12 | 609.125  | 0.1  | 3.83 | +HCOO | 202365 |
| 46 | Phaeophorbide B                                                                             | C21H20O12 | 463.088  | -0.2 | 5.86 | -H    | 199301 |
| 47 | Puerin C                                                                                    | C21H20O12 | 463.088  | -0.2 | 5.86 | -H    | 199301 |
| 48 | Puerin E                                                                                    | C21H20O12 | 463.088  | -0.2 | 5.86 | -H    | 199301 |
| 49 | Naphthalene                                                                                 | C27H30O14 | 577.1555 | -0.8 | 5.71 | -H    | 191776 |
| 50 | Proline                                                                                     | C29H24O12 | 609.1252 | 0.2  | 2.48 | +HCOO | 186855 |
| 51 | Apigenin                                                                                    | C33H40O20 | 755.2045 | 0.5  | 5.72 | -H    | 183656 |
| 52 | Trans-2-decenal                                                                             | C33H40O20 | 755.2045 | 0.5  | 5.72 | -H    | 183656 |
| 53 | $\alpha$ -linolenic acid                                                                    | C33H40O20 | 755.2045 | 0.5  | 5.72 | -H    | 183656 |
| 54 | Amelliaone B                                                                                | C33H40O20 | 755.2045 | 0.5  | 5.72 | -H    | 183656 |
| 55 | 2,6,6-Trimethylcyclohexanone                                                                | C33H40O20 | 755.2045 | 0.5  | 5.72 | -H    | 183656 |
| 56 | 4-hydroxycoumarin                                                                           | C33H40O20 | 755.2045 | 0.5  | 5.72 | -H    | 183656 |
| 57 | Phenylalanine                                                                               | C33H40O20 | 755.2045 | 0.5  | 5.72 | -H    | 183656 |
| 58 | p-OH ethyl cinnamate                                                                        | C37H30O17 | 791.1472 | 0.7  | 4.86 | +HCOO | 165909 |
| 59 | Theasapogenol C                                                                             | C37H30O17 | 791.1472 | 0.7  | 4.86 | +HCOO | 165909 |
| 60 | Theophylline                                                                                | C37H30O17 | 791.1472 | 0.7  | 4.86 | +HCOO | 165909 |
| 61 | Benzyl $\beta$ -D-glucoside                                                                 | C37H30O17 | 791.1472 | 0.7  | 4.86 | +HCOO | 165909 |
| 62 | 8-carboxyMe-(+)-catechin Me ester                                                           | C21H23NO  | 416.1345 | -0.6 | 4.62 | -H    | 164412 |
| 63 | 8-Carboxymethyl-(+)-<br>catechin methyl ester                                               | C21H23NO  | 416.1345 | -0.6 | 4.62 | -H    | 164412 |
| 64 | Theacitrinin B                                                                              | C21H23NO  | 416.1345 | -0.6 | 4.62 | -H    | 164412 |
| 65 | Kaempferitrin                                                                               | C21H23NO  | 416.1345 | -0.6 | 4.62 | -H    | 164412 |
| 66 | Kaempferol 3-O- $\beta$ -D-Gal-(1→3)- $\alpha$ -L-<br>Rha-(1→6)-O-D-galactoside             | C21H23NO  | 416.1345 | -0.6 | 4.62 | -H    | 164412 |
| 67 | Kaempferol 3-O- $\beta$ -D-Gal-(1→3)- $\alpha$ -L-<br>Rha-(1→6)-O-D-glucoside               | C21H23NO  | 416.1345 | -0.6 | 4.62 | -H    | 164412 |
| 68 | Kaempferol 3-O- $\beta$ -D-Glu-(1→3)- $\alpha$ -L-<br>Rha-(1→6)-O-D-glucoside               | C21H23NO  | 416.1345 | -0.6 | 4.62 | -H    | 164412 |
| 69 | Kaempferol-3-O-[[ $\beta$ -D-glucopyranosyl-(1<br>→3)-O-ethyl]-(1→6)-O-ethyl]               | C21H23NO  | 416.1345 | -0.6 | 4.62 | -H    | 164412 |
| 70 | 1,3-benzenediol                                                                             | C26H28O14 | 563.1404 | -0.2 | 5.19 | -H    | 159236 |
| 71 | Amelliaone C                                                                                | C23H20O11 | 471.0928 | -0.5 | 5.44 | -H    | 148015 |
| 72 | Quercetin-3-O- $\alpha$ -L-Rha-(1→6)-(2-E-p-<br>coumaroyl)- $\beta$ -D-glucoside 4" O-ethyl | C28H27NO  | 568.1463 | 0.2  | 5.84 | -H    | 140597 |
| 73 | Theasinensin C                                                                              | C28H27NO  | 568.1463 | 0.2  | 5.84 | -H    | 140597 |
| 74 | Theasinensin E                                                                              | C28H27NO  | 568.1463 | 0.2  | 5.84 | -H    | 140597 |

|     |                                          |           |          |      |      |       |        |
|-----|------------------------------------------|-----------|----------|------|------|-------|--------|
| 75  | 5"-R-ethylpyrrolidinonyl EGC             | C28H27NO  | 568.1463 | 0.2  | 5.84 | -H    | 140597 |
| 76  | Kaempferol-3-O-[(E)-p-coumaroyl-(1→      | C21H23NO  | 400.1397 | -0.5 | 5.82 | -H    | 137318 |
| 77  | Quercetin-3-O-[(E)-p-coumaroyl-(1→       | C21H23NO  | 400.1397 | -0.5 | 5.82 | -H    | 137318 |
| 78  | 3-p-coumaroyl-quinic acid                | C21H23NO  | 400.1397 | -0.5 | 5.82 | -H    | 137318 |
| 79  | 5-p-coumaroyl-quinic acid                | C21H23NO  | 400.1397 | -0.5 | 5.82 | -H    | 137318 |
| 80  | Coumaroylquinic acid                     | C21H23NO  | 400.1397 | -0.5 | 5.82 | -H    | 137318 |
| 81  | (-)-Epigallocatechin-3-O-gallate         | C21H23NO  | 400.1397 | -0.5 | 5.82 | -H    | 137318 |
| 82  | Gallocatechin 3-O-gallate                | C21H23NO  | 400.1397 | -0.5 | 5.82 | -H    | 137318 |
| 83  | gentisic acid 5-O-(6'-O-G)-β-D-glucoside | C21H23NO  | 400.1397 | -0.5 | 5.82 | -H    | 137318 |
| 84  | Herbacetin                               | C26H32O13 | 551.1772 | 0.2  | 7.21 | -     | 121986 |
| 85  | (+)-Catechin 3-O-gallate                 | C13H16O10 | 331.0666 | -0.5 | 3.54 | -H    | 111531 |
| 86  | Icariside B5                             | C13H16O10 | 331.0666 | -0.5 | 3.54 | -H    | 111531 |
| 87  | Theasapogenol A                          | C13H16O10 | 331.0666 | -0.5 | 3.54 | -H    | 111531 |
| 88  | Catechol                                 | C13H16O10 | 331.0666 | -0.5 | 3.54 | -H    | 111531 |
| 89  | N-ethyl-5-OH-2-pyrrolidinone             | C27H30O14 | 623.1611 | -0.7 | 4.34 | +HCOO | 110453 |
| 90  | Acetonyl theacitrin A                    | C21H23NO  | 400.1395 | -0.6 | 5.44 | -H    | 108384 |
| 91  | Teadenol A                               | C21H23NO  | 400.1395 | -0.6 | 5.44 | -H    | 108384 |
| 92  | Teadenol B                               | C21H23NO  | 400.1395 | -0.6 | 5.44 | -H    | 108384 |
| 93  | Epigallocatechin-(4β→8)-catechin         | C21H23NO  | 400.1395 | -0.6 | 5.44 | -H    | 108384 |
| 94  | 1,4,6-tri-O-G-β-D-glu                    | C21H23NO  | 400.1395 | -0.6 | 5.44 | -H    | 108384 |
| 95  | Quercetin 3-O-α-L-rhamnoside             | C21H23NO  | 400.1395 | -0.6 | 5.44 | -H    | 108384 |
| 96  | Biorobin                                 | C21H23NO  | 400.1395 | -0.6 | 5.44 | -H    | 108384 |
| 97  | Kaempferol 3-O-Rha-galactoside           | C21H23NO  | 400.1395 | -0.6 | 5.44 | -H    | 108384 |
| 98  | Trans-2,trans-4-decadienal               | C26H28O14 | 563.1405 | -0.1 | 5.29 | -H    | 107050 |
| 99  | Physcion                                 | C37H30O16 | 729.1467 | 0.5  | 4.92 | -H    | 103873 |
| 100 | (-)-EA                                   | C37H30O16 | 729.1467 | 0.5  | 4.92 | -H    | 103873 |
| 101 | 1,2,6-tri-O-G-β-D-glu                    | C16H18O8  | 337.0922 | -0.7 | 4.64 | -H    | 92017  |
| 102 | ECG-(4β→6)-EGCG                          | C16H18O8  | 337.0922 | -0.7 | 4.64 | -H    | 92017  |
| 103 | ECG-(4β→8)-EGCG                          | C16H18O8  | 337.0922 | -0.7 | 4.64 | -H    | 92017  |
| 104 | Procyanidin B2                           | C16H18O8  | 337.0922 | -0.7 | 4.64 | -H    | 92017  |
| 105 | Xanthine                                 | C15H12O5  | 317.0659 | -0.7 | 4.46 | +HCOO | 88056  |
| 106 | Puerin F                                 | C18H26O10 | 447.1502 | -0.6 | 6.2  | +HCOO | 87491  |
| 107 | Assamicain C                             | C27H22O18 | 633.0742 | 0.9  | 4.12 | -H    | 81712  |
| 108 | 8-carboxyl-(+)-catechin                  | C26H34O11 | 567.2081 | -0.3 | 6.88 | +HCOO | 80258  |
| 109 | 4-O-caffeoyl-quinic acid                 | C33H40O22 | 787.1945 | 0.6  | 4.83 | -H    | 72981  |
| 110 | Kaempferol                               | C14H16O10 | 343.0665 | -0.6 | 3.55 | -H    | 68260  |
| 111 | Myricetin 3-galactoside                  | C14H16O10 | 343.0665 | -0.6 | 3.55 | -H    | 68260  |
| 112 | Myricetin 3-O-β-D-glucoside              | C35H42O20 | 781.2203 | 0.7  | 7.14 | -H    | 64076  |
| 113 | EGCG-(4β→6)-ECG                          | C28H27NO  | 552.1508 | -0.4 | 6.98 | -H    | 61711  |
| 114 | 3',4',5-triOH-7-OMe-flavone              | C28H27NO  | 552.1508 | -0.4 | 6.98 | -H    | 61711  |

|     |                                           |                                                 |          |      |      |       |       |
|-----|-------------------------------------------|-------------------------------------------------|----------|------|------|-------|-------|
| 115 | 3',4',7-triOH-5-OMe-flavone               | C <sub>28</sub> H <sub>27</sub> NO              | 552.1508 | -0.4 | 6.98 | -H    | 61711 |
| 116 | Neotheaflavin                             | C <sub>28</sub> H <sub>27</sub> NO              | 552.1508 | -0.4 | 6.98 | -H    | 61711 |
| 117 | 4,5-di-O-G-quinic acid                    | C <sub>41</sub> H <sub>44</sub> O <sub>22</sub> | 887.2266 | 1.5  | 9.03 | -H    | 60514 |
| 118 | Dihydrophaseic acid                       | C <sub>36</sub> H <sub>28</sub> O <sub>16</sub> | 761.1368 | 0.8  | 4.13 | +HCOO | 59495 |
| 119 | Procyanidin B3                            | C <sub>36</sub> H <sub>28</sub> O <sub>16</sub> | 761.1368 | 0.8  | 4.13 | +HCOO | 59495 |
| 120 | Procyanidin B4                            | C <sub>36</sub> H <sub>28</sub> O <sub>16</sub> | 761.1368 | 0.8  | 4.13 | +HCOO | 59495 |
| 121 | Procyanidin B5                            | C <sub>36</sub> H <sub>28</sub> O <sub>16</sub> | 761.1368 | 0.8  | 4.13 | +HCOO | 59495 |
| 122 | Pantothenic acid                          | C <sub>37</sub> H <sub>30</sub> O <sub>18</sub> | 761.1368 | 0.8  | 4.13 | -H    | 59495 |
| 123 | 4-Hydroxyphenylacetic acid                | C <sub>37</sub> H <sub>30</sub> O <sub>18</sub> | 761.1368 | 0.8  | 4.13 | -H    | 59495 |
| 124 | DL-4-Chlorophenylalanine                  | C <sub>28</sub> H <sub>27</sub> NO              | 552.1509 | -0.2 | 6.57 | -H    | 57123 |
| 125 | 4-Ethyl-2-methoxyphenol                   | C <sub>28</sub> H <sub>27</sub> NO              | 552.1509 | -0.2 | 6.57 | -H    | 57123 |
| 126 | 4-Me-1,2-benzenediol                      | C <sub>28</sub> H <sub>27</sub> NO              | 552.1509 | -0.2 | 6.57 | -H    | 57123 |
| 127 | Delphinidin                               | C <sub>28</sub> H <sub>27</sub> NO              | 552.1509 | -0.2 | 6.57 | -H    | 57123 |
| 128 | Epidihydrophaseic acid                    | C <sub>36</sub> H <sub>28</sub> O <sub>16</sub> | 761.1378 | 1.9  | 3.9  | +HCOO | 56429 |
| 129 | EA-gallate-(4β→8)-ECG                     | C <sub>36</sub> H <sub>28</sub> O <sub>16</sub> | 761.1378 | 1.9  | 3.9  | +HCOO | 56429 |
| 130 | Quercetin 3,7-di-O-α-L-rhamnoside         | C <sub>36</sub> H <sub>28</sub> O <sub>16</sub> | 761.1378 | 1.9  | 3.9  | +HCOO | 56429 |
| 131 | Coniferin                                 | C <sub>36</sub> H <sub>28</sub> O <sub>16</sub> | 761.1378 | 1.9  | 3.9  | +HCOO | 56429 |
| 132 | (-)-EGC 3-O-(4-O-Me)-gallate              | C <sub>37</sub> H <sub>30</sub> O <sub>18</sub> | 761.1378 | 1.9  | 3.9  | -H    | 56429 |
| 133 | (-)-Epigallocatechin 3-(3-methyl-gallate) | C <sub>37</sub> H <sub>30</sub> O <sub>18</sub> | 761.1378 | 1.9  | 3.9  | -H    | 56429 |
| 134 | 2,3-diOH-1-(4-OH-3-OMe-phenyl)-           | C <sub>37</sub> H <sub>30</sub> O <sub>18</sub> | 761.1378 | 1.9  | 3.9  | -H    | 56429 |
| 135 | Amelliaone A                              | C <sub>37</sub> H <sub>30</sub> O <sub>18</sub> | 761.1378 | 1.9  | 3.9  | -H    | 56429 |
| 136 | 1,3-di-O-G-β-D-glu                        | C <sub>16</sub> H <sub>18</sub> O <sub>9</sub>  | 353.0871 | -0.7 | 4.26 | -H    | 54433 |
| 137 | Vitexin-4"-O-glucoside                    | C <sub>16</sub> H <sub>18</sub> O <sub>9</sub>  | 353.0871 | -0.7 | 4.26 | -H    | 54433 |
| 138 | 3',4',5,7-tetraOH-flavone                 | C <sub>16</sub> H <sub>18</sub> O <sub>9</sub>  | 353.0871 | -0.7 | 4.26 | -H    | 54433 |
| 139 | Linalool oxide A                          | C <sub>15</sub> H <sub>22</sub> O <sub>5</sub>  | 281.1387 | -0.7 | 4.93 | -H    | 53229 |
| 140 | Linalool oxide B                          | C <sub>15</sub> H <sub>22</sub> O <sub>5</sub>  | 281.1387 | -0.7 | 4.93 | -H    | 53229 |
| 141 | Linalool oxide C                          | C <sub>15</sub> H <sub>22</sub> O <sub>5</sub>  | 281.1387 | -0.7 | 4.93 | -H    | 53229 |
| 142 | 1,2-di-O-G-β-D-glu                        | C <sub>30</sub> H <sub>26</sub> O <sub>13</sub> | 593.1301 | 0    | 4.02 | -H    | 49937 |
| 143 | 5-caffeoyl-quinic acid                    | C <sub>30</sub> H <sub>26</sub> O <sub>13</sub> | 593.13   | 0    | 3.92 | -H    | 49827 |
| 144 | Diacetyl                                  | C <sub>30</sub> H <sub>26</sub> O <sub>13</sub> | 593.13   | 0    | 3.92 | -H    | 49827 |
| 145 | (-)-3-OH-β-ionone                         | C <sub>30</sub> H <sub>26</sub> O <sub>13</sub> | 593.13   | 0    | 3.92 | -H    | 49827 |
| 146 | 2-Methylphenol                            | C <sub>30</sub> H <sub>26</sub> O <sub>13</sub> | 593.13   | 0    | 3.92 | -H    | 49827 |
| 147 | Luteolin                                  | C <sub>28</sub> H <sub>24</sub> O <sub>17</sub> | 631.0948 | 0.7  | 4.87 | -H    | 46985 |
| 148 | Chafuroside A                             | C <sub>21</sub> H <sub>23</sub> NO              | 416.1347 | -0.4 | 4.43 | -H    | 41421 |
| 149 | Chafuroside B                             | C <sub>21</sub> H <sub>23</sub> NO              | 416.1347 | -0.4 | 4.43 | -H    | 41421 |
| 150 | Matairesinol                              | C <sub>21</sub> H <sub>23</sub> NO              | 416.1347 | -0.4 | 4.43 | -H    | 41421 |
| 151 | Isolariciresinol                          | C <sub>21</sub> H <sub>23</sub> NO              | 416.1347 | -0.4 | 4.43 | -H    | 41421 |
| 152 | Theogallinin                              | C <sub>21</sub> H <sub>23</sub> NO              | 416.1347 | -0.4 | 4.43 | -H    | 41421 |
| 153 | Strictinin                                | C <sub>21</sub> H <sub>23</sub> NO              | 416.1347 | -0.4 | 4.43 | -H    | 41421 |
| 154 | Puerin B                                  | C <sub>21</sub> H <sub>23</sub> NO              | 416.1347 | -0.4 | 4.43 | -H    | 41421 |

|     |                                                                           |                                                 |          |      |      |             |       |
|-----|---------------------------------------------------------------------------|-------------------------------------------------|----------|------|------|-------------|-------|
| 155 | (-)-EGC 3-O-caffeoate                                                     | C <sub>21</sub> H <sub>23</sub> NO              | 416.1347 | -0.4 | 4.43 | -H          | 41421 |
| 156 | EGCG-4"-Me                                                                | C <sub>15</sub> H <sub>12</sub> O <sub>8</sub>  | 365.0512 | -0.2 | 4.07 | +HCOO<br>rr | 40240 |
| 157 | Fuzhuanin E                                                               | C <sub>30</sub> H <sub>26</sub> O <sub>13</sub> | 593.1298 | -0.3 | 3.79 | -H          | 39821 |
| 158 | 8-C-ascorbyl (-)-EGC 3-O-gallate                                          | C <sub>45</sub> H <sub>38</sub> O <sub>18</sub> | 865.1987 | 0.2  | 4.48 | -H          | 39754 |
| 159 | (2R)-2-OH-3-(2,4,6-triOH-phenyl)-1-(2,4,5-triOH-phenyl)-1-propanediol 3-O | C <sub>19</sub> H <sub>30</sub> O <sub>8</sub>  | 431.1918 | -0.4 | 4.81 | +HCOO<br>rr | 37436 |
| 160 | Theasinensin A                                                            | C <sub>14</sub> H <sub>12</sub> O <sub>6</sub>  | 275.0555 | -0.6 | 4.05 | -H          | 35619 |
| 161 | Theasinensin D                                                            | C <sub>14</sub> H <sub>12</sub> O <sub>6</sub>  | 275.0555 | -0.6 | 4.05 | -H          | 35619 |
| 162 | Quercetin 3-O-Rha-(2→1)-galactoside                                       | C <sub>45</sub> H <sub>38</sub> O <sub>18</sub> | 865.1991 | 0.5  | 5.47 | -H          | 33905 |
| 163 | Neotheaflavin 3-gallate                                                   | C <sub>36</sub> H <sub>28</sub> O <sub>16</sub> | 761.1374 | 1.4  | 4.45 | +HCOO<br>rr | 32704 |
| 164 | Isotheaflavin 3'-gallate                                                  | C <sub>36</sub> H <sub>28</sub> O <sub>16</sub> | 761.1374 | 1.4  | 4.45 | +HCOO<br>rr | 32704 |
| 165 | Theaflavin-3'-gallate                                                     | C <sub>36</sub> H <sub>28</sub> O <sub>16</sub> | 761.1374 | 1.4  | 4.45 | +HCOO<br>rr | 32704 |
| 166 | Theaflavin-3-gallate                                                      | C <sub>36</sub> H <sub>28</sub> O <sub>16</sub> | 761.1374 | 1.4  | 4.45 | +HCOO<br>rr | 32704 |
| 167 | Prodelfinidin B-4 3'-O-gallate                                            | C <sub>37</sub> H <sub>30</sub> O <sub>18</sub> | 761.1374 | 1.4  | 4.45 | -H          | 32704 |
| 168 | Quercetin 3-O-Gal-rutinoside                                              | C <sub>37</sub> H <sub>30</sub> O <sub>18</sub> | 761.1374 | 1.4  | 4.45 | -H          | 32704 |
| 169 | Theasinensin H                                                            | C <sub>37</sub> H <sub>30</sub> O <sub>18</sub> | 761.1374 | 1.4  | 4.45 | -H          | 32704 |
| 170 | Isoquercitrin                                                             | C <sub>37</sub> H <sub>30</sub> O <sub>18</sub> | 761.1374 | 1.4  | 4.45 | -H          | 32704 |
| 171 | 5-G-quinic acid                                                           | C <sub>42</sub> H <sub>46</sub> O <sub>22</sub> | 901.2416 | 0.8  | 8.61 | -H          | 32020 |
| 172 | Fuzhuanin A                                                               | C <sub>27</sub> H <sub>30</sub> O <sub>14</sub> | 623.1623 | 0.5  | 3.88 | +HCOO       | 31426 |
| 173 | Procyanidin B-2 3'-O-gallate                                              | C <sub>27</sub> H <sub>30</sub> O <sub>14</sub> | 623.1623 | 0.5  | 3.88 | +HCOO       | 31426 |
| 174 | Vicenin 2                                                                 | C <sub>21</sub> H <sub>18</sub> O <sub>9</sub>  | 459.0929 | -0.4 | 5.85 | +HCOO       | 29525 |
| 175 | Vitexin-2                                                                 | C <sub>21</sub> H <sub>18</sub> O <sub>9</sub>  | 459.0929 | -0.4 | 5.85 | +HCOO       | 29525 |
| 176 | Theaflagallin                                                             | C <sub>27</sub> H <sub>30</sub> O <sub>14</sub> | 577.1556 | -0.7 | 6.08 | -H          | 27248 |
| 177 | Kaempferol-3-O-[α-L-Rha-(1→3)-α-L-Rha-(1→3)-β-D-glucopyranoside]          | C <sub>27</sub> H <sub>30</sub> O <sub>14</sub> | 577.1556 | -0.7 | 6.08 | -H          | 27248 |
| 178 | Astragalin                                                                | C <sub>15</sub> H <sub>12</sub> O <sub>8</sub>  | 365.0508 | -0.6 | 4.62 | +HCOO       | 26982 |
| 179 | p-OH-phenethylalcohol                                                     | C <sub>20</sub> H <sub>20</sub> O <sub>14</sub> | 483.0786 | 0.6  | 3.87 | -H          | 25615 |
| 180 | Leucine                                                                   | C <sub>20</sub> H <sub>20</sub> O <sub>14</sub> | 483.0786 | 0.6  | 3.87 | -H          | 25615 |
| 181 | Toluene                                                                   | C <sub>20</sub> H <sub>20</sub> O <sub>14</sub> | 483.0786 | 0.6  | 3.87 | -H          | 25615 |
| 182 | Theasinensin F                                                            | C <sub>42</sub> H <sub>46</sub> O <sub>22</sub> | 901.2414 | 0.6  | 9    | -H          | 25180 |
| 183 | EGCG-(4β→8)-EGCG                                                          | C <sub>28</sub> H <sub>27</sub> NO              | 568.1462 | 0.2  | 5.95 | -H          | 24561 |
| 184 | Prodelfinidin B-2 3,3'-di-O-gallate                                       | C <sub>28</sub> H <sub>27</sub> NO              | 568.1462 | 0.2  | 5.95 | -H          | 24561 |
| 185 | Prodelfinidin B-5 3,3'-di-O-gallate                                       | C <sub>28</sub> H <sub>27</sub> NO              | 568.1462 | 0.2  | 5.95 | -H          | 24561 |
| 186 | (3R,9R)-3-hydroxy-7,8-dihydro-β-ionol 6-O-β-D-galactopyranoside           | C <sub>28</sub> H <sub>27</sub> NO              | 568.1462 | 0.2  | 5.95 | -H          | 24561 |
| 187 | Quercetin 3-O-β-D-galactoside                                             | C <sub>21</sub> H <sub>20</sub> O <sub>12</sub> | 463.0876 | -0.6 | 4.44 | -H          | 24184 |
| 188 | Quercetin 3-O-β-D-glucoside                                               | C <sub>21</sub> H <sub>20</sub> O <sub>12</sub> | 463.0876 | -0.6 | 4.44 | -H          | 24184 |
| 189 | Oolongtheanin                                                             | C <sub>21</sub> H <sub>20</sub> O <sub>12</sub> | 463.0876 | -0.6 | 4.44 | -H          | 24184 |
| 190 | 5"-S-ethylpyrrolidinonyl EGC-3-O-gallate                                  | C <sub>21</sub> H <sub>20</sub> O <sub>12</sub> | 463.0876 | -0.6 | 4.44 | -H          | 24184 |
| 191 | Roseoside                                                                 | C <sub>35</sub> H <sub>42</sub> O <sub>20</sub> | 781.2205 | 0.9  | 6.76 | -H          | 23956 |
| 192 | Linalool oxide D                                                          | C <sub>24</sub> H <sub>20</sub> O <sub>10</sub> | 467.098  | -0.4 | 6.2  | -H          | 21488 |
| 193 | Ect-pyrrolidinone E                                                       | C <sub>37</sub> H <sub>30</sub> O <sub>17</sub> | 745.1431 | 2    | 4.59 | -H          | 20737 |
| 194 | Ect-pyrrolidinone F                                                       | C <sub>37</sub> H <sub>30</sub> O <sub>17</sub> | 745.1431 | 2    | 4.59 | -H          | 20737 |

|     |                                                                             |           |          |      |      |       |       |
|-----|-----------------------------------------------------------------------------|-----------|----------|------|------|-------|-------|
| 195 | Procyanidin B-4 3'-O-gallate                                                | C37H30O17 | 745.1431 | 2    | 4.59 | -H    | 20737 |
| 196 | Kaempferol 3-rhamnoside-7-rutinoside                                        | C37H30O17 | 745.1431 | 2    | 4.59 | -H    | 20737 |
| 197 | Rutin                                                                       | C36H28O15 | 745.1431 | 2    | 4.59 | +HCOO | 20737 |
| 198 | (-)-EGC 3'-O-Me-gallate                                                     | C41H44O21 | 871.2311 | 0.8  | 9.03 | -H    | 20255 |
| 199 | Xanthocerin                                                                 | C20H18O11 | 433.0776 | -0.1 | 4.48 | -H    | 19134 |
| 200 | 2,6-Dimethoxybenzoic acid                                                   | C31H28O13 | 607.1451 | -0.6 | 5.13 | -H    | 18804 |
| 201 | EA 3-O-gallate-(4 $\beta$ →6)-EGCG                                          | C37H30O16 | 775.1515 | -0.1 | 5.13 | +HCOO | 18685 |
| 202 | Naringenin                                                                  | C37H30O16 | 775.1515 | -0.1 | 5.13 | +HCOO | 18685 |
| 203 | Myricetin 3-(6"-galloylglucoside)                                           | C33H40O19 | 785.2158 | 1.2  | 6.11 | +HCOO | 18520 |
| 204 | Isotheaflavin                                                               | C33H40O19 | 785.2158 | 1.2  | 6.11 | +HCOO | 18520 |
| 205 | Theaflavin                                                                  | C33H40O19 | 785.2158 | 1.2  | 6.11 | +HCOO | 18520 |
| 206 | 2,2',6,6'-tetraOH-diphenyl                                                  | C20H18O11 | 433.0774 | -0.2 | 3.71 | -H    | 17929 |
| 207 | Quercetin 3-O-Glu-(1→3)-Rha-(1→6)-rutinoside                                | C33H40O21 | 771.1991 | 0.2  | 4.94 | -H    | 17152 |
| 208 | Quercetin 3-O-Glu-rutinoside                                                | C33H40O21 | 771.1991 | 0.2  | 4.94 | -H    | 17152 |
| 209 | Quercetin 3-O- $\beta$ -D-Glu-(1→3)- $\alpha$ -L-Rha-(1→6)-rutinoside       | C33H40O21 | 771.1991 | 0.2  | 4.94 | -H    | 17152 |
| 210 | Quercetin-3-O-[ $\beta$ -D-glucopyranosyl-(1→3)-O-Galloyl]-rutinoside       | C33H40O21 | 771.1991 | 0.2  | 4.94 | -H    | 17152 |
| 211 | Isovitexin                                                                  | C33H40O21 | 771.1991 | 0.2  | 4.94 | -H    | 17152 |
| 212 | (-)-EGC 3,3'-di-O-gallate                                                   | C18H18O8  | 407.0974 | -1   | 4.47 | +HCOO | 15748 |
| 213 | (-)-EGC 3,4-di-O-gallate                                                    | C18H18O8  | 407.0974 | -1   | 4.47 | +HCOO | 15748 |
| 214 | 2-O-G-D-glu                                                                 | C26H34O11 | 567.2088 | 0.5  | 5.94 | +HCOO | 15050 |
| 215 | 2,6-di-O-G- $\beta$ -D-glu                                                  | C27H30O14 | 623.1617 | -0.1 | 6.64 | +HCOO | 14703 |
| 216 | 3,4-diOMe-phenol                                                            | C27H30O14 | 623.1617 | -0.1 | 6.64 | +HCOO | 14703 |
| 217 | Theobromine                                                                 | C20H20O14 | 483.0793 | 1.2  | 4.25 | -H    | 14057 |
| 218 | 6,10,14-Trimethylpentadecan-2-one                                           | C20H20O14 | 483.0793 | 1.2  | 4.25 | -H    | 14057 |
| 219 | (E)-Hept-2-enal                                                             | C20H20O14 | 483.0793 | 1.2  | 4.25 | -H    | 14057 |
| 220 | Catechin-(4 $\alpha$ →8)-EGC                                                | C37H30O17 | 745.1413 | 0.3  | 5.08 | -H    | 13696 |
| 221 | GC-(4 $\alpha$ →8)-EC                                                       | C37H30O17 | 745.1413 | 0.3  | 5.08 | -H    | 13696 |
| 222 | (-)-EC 3,5-di-O-gallate                                                     | C37H30O17 | 745.1413 | 0.3  | 5.08 | -H    | 13696 |
| 223 | Apigenin-6-C-Glu-8-arabinoside                                              | C37H30O17 | 745.1413 | 0.3  | 5.08 | -H    | 13696 |
| 224 | (-)-Epicatechin                                                             | C36H28O15 | 745.1413 | 0.3  | 5.08 | +HCOO | 13696 |
| 225 | 1,2,4-benzenetriol                                                          | C36H28O17 | 777.1327 | 1.8  | 4.87 | +HCOO | 12956 |
| 226 | 2-Methoxy-4-propylphenol                                                    | C21H20O11 | 493.0989 | 0.1  | 6.06 | +HCOO | 11988 |
| 227 | 3,5-diOH-benzoic acid                                                       | C21H20O11 | 493.0989 | 0.1  | 6.06 | +HCOO | 11988 |
| 228 | Gentisic acid                                                               | C21H20O11 | 493.0989 | 0.1  | 6.06 | +HCOO | 11988 |
| 229 | Indoleacrylic acid                                                          | C21H20O11 | 493.0989 | 0.1  | 6.06 | +HCOO | 11988 |
| 230 | Glutaric acid                                                               | C16H12O6  | 345.0632 | 1.6  | 4.45 | +HCOO | 11777 |
| 231 | 2,5-Dimethylphenol                                                          | C16H12O6  | 345.0632 | 1.6  | 4.45 | +HCOO | 11777 |
| 232 | Theasapogenol B                                                             | C18H18O8  | 361.0922 | -0.7 | 5.15 | -H    | 11514 |
| 233 | EC-[7,8-bc]-4 $\alpha$ -(4-OH-phenyl)-dihydro-2,2,3-trimethyl-2H-pyran-3-ol | C18H18O8  | 361.0922 | -0.7 | 5.15 | -H    | 11514 |
| 234 | Erythro-(7S,8R)-guaiacyl-glycerol- $\beta$ -O-4'-dihydroxybenzyl ether      | C13H14O6  | 265.0711 | -0.6 | 4.45 | -H    | 10642 |

|     |                                                                                                         |           |          |      |      |       |      |
|-----|---------------------------------------------------------------------------------------------------------|-----------|----------|------|------|-------|------|
| 235 | 3-Ethylphenol                                                                                           | C30H26O14 | 655.1305 | 0    | 4.1  | +HCOO | 9777 |
| 236 | Tyrosine                                                                                                | C30H26O14 | 655.1305 | 0    | 4.1  | +HCOO | 9777 |
| 237 | Myricetin-3-O- $[\beta$ -D-Glu-(1 $\rightarrow$ 3)- $\alpha$ -L-<br>Rha-(1 $\rightarrow$ 6)-D-Galloyl)] | C33H40O22 | 787.1918 | -2   | 4.46 | -H    | 9589 |
| 238 | Phloroglucinol                                                                                          | C25H24O12 | 515.1193 | -0.2 | 6.32 | -H    | 9249 |
| 239 | Pyrogallol                                                                                              | C37H30O16 | 729.1474 | 1.3  | 4.73 | -H    | 8849 |
| 240 | 3,4-Dihydroxyphenylvaleric acid                                                                         | C37H30O16 | 729.1474 | 1.3  | 4.73 | -H    | 8849 |
| 241 | Gallic acid                                                                                             | C26H34O11 | 521.2029 | 0.1  | 6.49 | -H    | 8677 |
| 242 | 8-carboxyMe-(+)-catechin                                                                                | C30H26O13 | 639.1347 | -0.8 | 4.26 | +HCOO | 8661 |
| 243 | Ampelopsin                                                                                              | C30H26O13 | 639.1347 | -0.8 | 4.26 | +HCOO | 8661 |
| 244 | Eriodictyol                                                                                             | C30H26O13 | 639.1347 | -0.8 | 4.26 | +HCOO | 8661 |
| 245 | EC-[8,7-bc]-4 $\beta$ -(4-OH-phenyl)-dihydro-<br>2,3,6-trihydroxybenzoic acid                           | C30H26O13 | 639.1347 | -0.8 | 4.26 | +HCOO | 8661 |
| 246 | Protocatechuic acid                                                                                     | C30H26O13 | 639.1347 | -0.8 | 4.26 | +HCOO | 8661 |
| 247 | Chlorogenic acid                                                                                        | C21H24O11 | 451.1273 | 2.7  | 3.99 | -H    | 8469 |
| 248 | Theogallin                                                                                              | C21H24O11 | 451.1273 | 2.7  | 3.99 | -H    | 8469 |
| 249 | 6-O-G- $\beta$ -D-glu                                                                                   | C21H24O11 | 451.1273 | 2.7  | 3.99 | -H    | 8469 |
| 250 | Kaempferol 3-O- $\alpha$ -L-rhamnopyranoside                                                            | C29H22O15 | 609.0879 | -0.7 | 5.82 | -H    | 8416 |
| 251 | Ethyl propanoate                                                                                        | C29H22O15 | 609.0879 | -0.7 | 5.82 | -H    | 8416 |
| 252 | Theacitrin B                                                                                            | C20H16O9  | 399.0712 | -0.9 | 4.46 | -H    | 8292 |
| 253 | Ect-pyrrolidinone J                                                                                     | C20H16O9  | 399.0712 | -0.9 | 4.46 | -H    | 8292 |
| 254 | Delphinidin-3-O- $\beta$ -D-(6-(E)-p-<br>coumaroyl)-galactoside                                         | C30H27O14 | 610.1346 | 1.8  | 4.45 | -H    | 8126 |
| 255 | Delphinidin-3-O- $\beta$ -D-(6-(E)-p-<br>coumaroyl)-glucoside                                           | C30H27O14 | 610.1346 | 1.8  | 4.45 | -H    | 8126 |
| 256 | 3,4,5-Trimethoxybenzaldehyde                                                                            | C21H20O4  | 495.0789 | 0.9  | 4    | -     | 7913 |
| 257 | Digallic acid                                                                                           | C21H20O4  | 495.0789 | 0.9  | 4    | -     | 7913 |
| 258 | Theaflavin 3,3'-digallate                                                                               | C21H24O11 | 451.1265 | 1.9  | 4.12 | -H    | 7898 |
| 259 | 3,4-Dimethoxybenzoic acid                                                                               | C21H24O11 | 451.1265 | 1.9  | 4.12 | -H    | 7898 |
| 260 | 3,5-dimethoxybenzoic acid                                                                               | C21H24O11 | 451.1265 | 1.9  | 4.12 | -H    | 7898 |
| 261 | Puerin VI                                                                                               | C38H32O16 | 743.1602 | -1.6 | 6.21 | -H    | 7559 |
| 262 | Quercetin 4'-O- $\alpha$ -L-Rha-3-O- $\alpha$ -L-Rha-(1<br>- $\rightarrow$ 6)-D-Galloyl)]               | C13H14O5  | 249.0776 | 0.8  | 4.45 | -H    | 7529 |
| 263 | Prodelphinidin B-2 3'-O-gallate                                                                         | C26H30O14 | 565.1559 | -0.4 | 4.62 | -H    | 7092 |
| 264 | (R)-6-oxo-4-((2R,3R)-3,5,7-<br>trihydroxyflavan-2-yl)-2,6-dihydroxy-<br>benzoic acid                    | C27H30O17 | 625.1387 | -2.3 | 4.81 | -H    | 6930 |
| 265 | Theaflavanside I                                                                                        | C26H30O14 | 565.1571 | 0.9  | 4.45 | -H    | 6884 |
| 266 | Fuzhuanin F                                                                                             | C20H24O6  | 359.1495 | -0.5 | 8.3  | -H    | 6822 |
| 267 | Theasinensin G                                                                                          | C20H20O13 | 513.0881 | -0.5 | 3.75 | +HCOO | 6752 |
| 268 | Puerin IV                                                                                               | C18H18O8  | 407.0984 | 0    | 4.61 | +HCOO | 6506 |
| 269 | Fuzhuanin B                                                                                             | C18H18O8  | 407.0984 | 0    | 4.61 | +HCOO | 6506 |
| 270 | (-)-EGC 3-O-p-coumaroate                                                                                | C22H18O12 | 473.0735 | 0.9  | 3.99 | -H    | 6482 |
| 271 | Phenylacetaldehyde                                                                                      | C21H16O10 | 473.0735 | 0.9  | 3.99 | +HCOO | 6482 |
| 272 | Syringic acid                                                                                           | C21H16O10 | 473.0735 | 0.9  | 3.99 | +HCOO | 6482 |
| 273 | Tiliroside                                                                                              | C30H26O14 | 655.1318 | 1.3  | 4.46 | +HCOO | 6358 |
| 274 | Myricetin-3-O-rutinoside                                                                                | C30H26O14 | 655.1318 | 1.3  | 4.46 | +HCOO | 6358 |



|     |                                         |           |          |      |      |       |      |
|-----|-----------------------------------------|-----------|----------|------|------|-------|------|
| 275 | Puerin VIII                             | C30H26O14 | 655.1318 | 1.3  | 4.46 | +HCOO | 6358 |
| 276 | (-)-EC 3-O-(3-O-Me)-gallate             | C30H26O14 | 655.1318 | 1.3  | 4.46 | +HCOO | 6358 |
| 277 | 3,5-dicaffeoyl-quinic acid              | C36H28O17 | 731.1267 | 1.3  | 6.23 | -H    | 6125 |
| 278 | Epitheaflagallin                        | C37H30O17 | 791.1494 | 2.9  | 5.32 | +HCOO | 6067 |
| 279 | Fuzhuanin C                             | C37H30O17 | 791.1494 | 2.9  | 5.32 | +HCOO | 6067 |
| 280 | Prodelphinidin B-4                      | C37H30O17 | 791.1494 | 2.9  | 5.32 | +HCOO | 6067 |
| 281 | Theacitrin A                            | C37H30O17 | 791.1494 | 2.9  | 5.32 | +HCOO | 6067 |
| 282 | Morin                                   | C20H20O13 | 467.0831 | 0    | 4.27 | -H    | 5724 |
| 283 | Myricitrin                              | C33H40O22 | 787.1936 | -0.3 | 4.97 | -H    | 5722 |
| 284 | 5"-R-ethylpyrrolidinonyl EGC-3-O-       | C37H28O18 | 759.1228 | 2.5  | 5.47 | -H    | 5601 |
| 285 | Ect-pyrrolidinone A                     | C37H28O18 | 759.1228 | 2.5  | 5.47 | -H    | 5601 |
| 286 | Dehydrotheasinensin H                   | C37H28O18 | 759.1228 | 2.5  | 5.47 | -H    | 5601 |
| 287 | 5"-R-ethylpyrrolidinonyl EC-3-O-gallate | C37H28O18 | 759.1228 | 2.5  | 5.47 | -H    | 5601 |
| 288 | Kaempferol 3-O-rutinoside               | C37H28O18 | 759.1228 | 2.5  | 5.47 | -H    | 5601 |
| 289 | (E)-2-Octenal                           | C37H30O16 | 775.1506 | -1   | 6.47 | +HCOO | 5248 |
| 290 | PuerinD                                 | C37H30O16 | 775.1506 | -1   | 6.47 | +HCOO | 5248 |
| 291 | Chakanoside II                          | C36H28O17 | 731.1277 | 2.3  | 5.1  | -H    | 5217 |
| 292 | 3',4'-Dihydroxyphenylalanine            | C19H28O10 | 461.1671 | 0.6  | 5.09 | +HCOO | 5213 |
| 293 | Kaempferol 3-O-β-D-galactoside          | C26H32O11 | 519.1864 | -0.8 | 6.66 | -H    | 5199 |
| 294 | 5"-S-ethylpyrrolidinonyl GC             | C17H16O8  | 393.0824 | -0.3 | 4.46 | +HCOO | 5189 |
| 295 | Puerin V                                | C17H16O8  | 393.0824 | -0.3 | 4.46 | +HCOO | 5189 |
| 296 | (-)-pinoresinol                         | C22H18O11 | 503.0851 | 2    | 4.44 | +HCOO | 5016 |
| 297 | Phenethylalcohol β-D-xylosyl (1→6)-β-D- | C22H18O11 | 503.0851 | 2    | 4.44 | +HCOO | 5016 |
| 298 | Ect-pyrrolidinone B                     | C18H26O10 | 401.1449 | -0.4 | 4.45 | -H    | 5008 |
| 299 | Procyanidin B-2 3,3'-di-O-gallate       | C15H14O8  | 367.0689 | 1.8  | 3.74 | +HCOO | 4861 |
| 300 | des-G theaflavonin                      | C36H32O20 | 783.1416 | 0.2  | 4.46 | -H    | 4828 |
| 301 | Afzelin                                 | C21H20O10 | 477.104  | 0.1  | 4.44 | +HCOO | 4625 |
| 302 | Vitexin                                 | C21H20O10 | 477.104  | 0.1  | 4.44 | +HCOO | 4625 |
| 303 | Theasinensin B                          | C21H20O10 | 477.104  | 0.1  | 4.44 | +HCOO | 4625 |
| 304 | Kaempferol-3-O-[α-L-Rha-(1→3)-α-L-      | C38H32O16 | 743.1591 | -2.6 | 4.3  | -H    | 4592 |
| 305 | Ellagic acid                            | C21H20O10 | 477.1034 | -0.4 | 6.95 | +HCOO | 4580 |
| 306 | 2-(4-OH-phenyl)ethyl β-D-glucoside      | C33H40O19 | 785.2123 | -2.3 | 6.25 | +HCOO | 4521 |
| 307 | Caffeic acid                            | C33H40O19 | 785.2123 | -2.3 | 6.25 | +HCOO | 4521 |
| 308 | m-Coumaric acid                         | C33H40O19 | 785.2123 | -2.3 | 6.25 | +HCOO | 4521 |
| 309 | Nicotiflorin                            | C33H40O19 | 739.21   | 0.9  | 5.49 | -H    | 4511 |
| 310 | 1-O-G-β-D-glu                           | C33H40O19 | 739.21   | 0.9  | 5.49 | -H    | 4511 |
| 311 | β-glucogallin                           | C33H40O19 | 739.21   | 0.9  | 5.49 | -H    | 4511 |
| 312 | Pinoresinol-4'-O-β-D-glucoside          | C22H24O8  | 415.1397 | -0.2 | 7.74 | -H    | 4392 |
| 313 | Vanillic acid                           | C29H22O14 | 639.1002 | 1    | 4.6  | +HCOO | 4380 |
| 314 | Cinchonain Ib                           | C37H30O16 | 775.1519 | 0.3  | 5.8  | +HCOO | 4364 |

|     |                                                                               |           |          |      |      |       |      |
|-----|-------------------------------------------------------------------------------|-----------|----------|------|------|-------|------|
| 315 | EC-[8,7-bc]-4β-(3,4-diOH-phenyl)-<br>dihydro-2(1H)-pyridinone                 | C37H30O16 | 775.1519 | 0.3  | 5.8  | +HCOO | 4364 |
| 316 | Icariside                                                                     | C20H24O6  | 405.1544 | -1.1 | 5.83 | +HCOO | 4361 |
| 317 | 6-carboxyl(-)-GC                                                              | C22H22O11 | 461.1102 | 1.3  | 6.2  | -H    | 4273 |
| 318 | 3α,5α-diOH-caffeoylquinic acid                                                | C27H24O18 | 635.089  | 0    | 4.3  | -H    | 4260 |
| 319 | p-coumaric acid                                                               | C27H24O18 | 635.089  | 0    | 4.3  | -H    | 4260 |
| 320 | 5"-R-ethylpyrrolidinonyl GC                                                   | C37H28O18 | 759.1218 | 1.5  | 4.6  | -H    | 4140 |
| 321 | 5"-S-ethylpyrrolidinonyl EGC                                                  | C37H28O18 | 759.1218 | 1.5  | 4.6  | -H    | 4140 |
| 322 | Epitheaflavic acid 3'-gallate                                                 | C37H28O18 | 759.1218 | 1.5  | 4.6  | -H    | 4140 |
| 323 | 4-p-coumaroyl-quinic acid                                                     | C37H28O18 | 759.1218 | 1.5  | 4.6  | -H    | 4140 |
| 324 | Epitheaflagallin 3-O-gallate                                                  | C37H28O18 | 759.1218 | 1.5  | 4.6  | -H    | 4140 |
| 325 | Talienbisflavan A                                                             | C36H28O17 | 731.1261 | 0.7  | 4.61 | -H    | 4120 |
| 326 | desG theasinensin F                                                           | C36H32O20 | 783.1441 | 2.7  | 3.83 | -H    | 4098 |
| 327 | Emodin                                                                        | C21H20O11 | 493.0996 | 0.8  | 3.71 | +HCOO | 3995 |
| 328 | Malic acid                                                                    | C21H20O11 | 493.0996 | 0.8  | 3.71 | +HCOO | 3995 |
| 329 | 3-Hydroxybenzoic acid                                                         | C21H20O11 | 493.0996 | 0.8  | 3.71 | +HCOO | 3995 |
| 330 | Salicylic acid                                                                | C21H20O11 | 493.0996 | 0.8  | 3.71 | +HCOO | 3995 |
| 331 | Teasperin                                                                     | C38H32O16 | 789.1652 | -2.1 | 5.06 | +HCOO | 3877 |
| 332 | Asiaticalin                                                                   | C20H20O13 | 467.0811 | -2   | 4.08 | -H    | 3835 |
| 333 | Prodelphinidin B                                                              | C16H16O8  | 335.0788 | 1.5  | 4.45 | -H    | 3824 |
| 334 | Benzene                                                                       | C15H14O6  | 335.0788 | 1.5  | 4.45 | +HCOO | 3824 |
| 335 | Hexanal                                                                       | C15H14O6  | 335.0788 | 1.5  | 4.45 | +HCOO | 3824 |
| 336 | Fuzhuanin D                                                                   | C36H28O17 | 777.133  | 2.1  | 5.33 | +HCOO | 3822 |
| 337 | Planchol A                                                                    | C21H16O10 | 427.0665 | -0.5 | 5.46 | -H    | 3666 |
| 338 | Teasperol                                                                     | C21H16O10 | 427.0665 | -0.5 | 5.46 | -H    | 3666 |
| 339 | Shikimic acid                                                                 | C43H32O19 | 897.1529 | 1    | 6.37 | +HCOO | 3662 |
| 340 | Pyrophaeophorbide A                                                           | C44H34O21 | 897.1529 | 1    | 6.37 | -H    | 3662 |
| 341 | Deoxythymidine                                                                | C44H34O21 | 897.1529 | 1    | 6.37 | -H    | 3662 |
| 342 | 4'-Hydroxyacetophenone                                                        | C44H34O21 | 897.1529 | 1    | 6.37 | -H    | 3662 |
| 343 | Gentisate aldehyde                                                            | C13H14O5  | 295.0842 | 1.9  | 4.96 | +HCOO | 3589 |
| 344 | Prodelphinidin A2 3'-gallate                                                  | C45H36O20 | 895.1757 | 3    | 5.1  | -H    | 3581 |
| 345 | Caffeine                                                                      | C31H28O13 | 653.1523 | 1.2  | 5.16 | +HCOO | 3547 |
| 346 | Kaempferol-3-O-[[β-D-glucopyranosyl]-<br>(1→3)-O-4-O-methylrhamnosyl-(1→6)-O- | C37H28O18 | 759.1219 | 1.6  | 4.81 | -H    | 3401 |
| 347 | Puerin III                                                                    | C37H28O18 | 759.1219 | 1.6  | 4.81 | -H    | 3401 |
| 348 | Theaflavate A                                                                 | C37H28O18 | 759.1219 | 1.6  | 4.81 | -H    | 3401 |
| 349 | Catechin                                                                      | C37H28O18 | 759.1219 | 1.6  | 4.81 | -H    | 3401 |
| 350 | p-OH-acetophenone                                                             | C37H28O18 | 759.1219 | 1.6  | 4.81 | -H    | 3401 |
| 351 | 6-Carboxymethyl(-)-gallocatechin                                              | C36H32O20 | 783.1436 | 2.2  | 4.94 | -H    | 3256 |
| 352 | (-)-EA 3-O-gallate                                                            | C20H20O13 | 513.0883 | -0.3 | 3.72 | +HCOO | 3212 |
| 353 | Uracil                                                                        | C44H34O19 | 911.1706 | 2.9  | 6.95 | +HCOO | 3205 |
| 354 | 3R,9R-oxido-5-megastigmene                                                    | C44H34O19 | 911.1706 | 2.9  | 6.95 | +HCOO | 3205 |

|     |                                                                    |           |          |      |      |       |      |
|-----|--------------------------------------------------------------------|-----------|----------|------|------|-------|------|
| 355 | Quercetin 3-arabinopyranoside                                      | C25H24O12 | 561.1244 | -0.6 | 4.96 | +HCOO | 3116 |
| 356 | (-)-EC 3-O-(4-O-Me)-gallate                                        | C30H26O13 | 639.1329 | -2.6 | 5.08 | +HCOO | 3022 |
| 357 | Salicylaldehyde                                                    | C30H26O13 | 639.1329 | -2.6 | 5.08 | +HCOO | 3022 |
| 358 | Piperitone                                                         | C30H26O13 | 639.1329 | -2.6 | 5.08 | +HCOO | 3022 |
| 359 | 2,5-Dimethylhexanal                                                | C30H26O13 | 639.1329 | -2.6 | 5.08 | +HCOO | 3022 |
| 360 | Fangchengbisflavan B                                               | C27H30O17 | 671.1478 | 1.3  | 4.6  | +HCOO | 3000 |
| 361 | Procyanidin B-5 3,3'-di-O-gallate                                  | C36H28O17 | 777.1325 | 1.7  | 5.94 | +HCOO | 2890 |
| 362 | (-)-EGC 3,5-di-O-gallate                                           | C18H18O8  | 361.0936 | 0.7  | 4.26 | -H    | 2834 |
| 363 | (±)-GC-3,5-di-O-gallate                                            | C18H18O8  | 361.0936 | 0.7  | 4.26 | -H    | 2834 |
| 364 | Quercetin                                                          | C16H20O7  | 323.1166 | 2.9  | 5.44 | -H    | 2801 |
| 365 | Hypoxanthine                                                       | C44H34O20 | 881.1579 | 0.8  | 7.33 | -H    | 2789 |
| 366 | Theasapogenol E                                                    | C36H28O15 | 699.1381 | 2.5  | 5.55 | -H    | 2693 |
| 367 | Fangchengbisflavan A                                               | C21H20O12 | 509.0961 | 2.5  | 4.61 | +HCOO | 2672 |
| 368 | gallic acid 3-O-(6'-O-G)-β-D-glucoside                             | C21H20O12 | 509.0961 | 2.5  | 4.61 | +HCOO | 2672 |
| 369 | 3,4-di-O-G-quinic acid                                             | C21H20O12 | 509.0961 | 2.5  | 4.61 | +HCOO | 2672 |
| 370 | (-)-Epicatechin 3-O-gallate                                        | C21H20O12 | 509.0961 | 2.5  | 4.61 | +HCOO | 2672 |
| 371 | Amelliaone E                                                       | C26H32O11 | 519.1875 | 0.3  | 7.45 | -H    | 2669 |
| 372 | 3-(4-Hydroxyphenyl)propionic acid                                  | C22H18O12 | 519.0777 | -0.3 | 4.08 | +HCOO | 2653 |
| 373 | Myricetin                                                          | C27H30O15 | 639.1561 | -0.6 | 5.01 | +HCOO | 2644 |
| 374 | EC-3-O-benzoate                                                    | C27H30O15 | 639.1561 | -0.6 | 5.01 | +HCOO | 2644 |
| 375 | Quinic acid                                                        | C27H30O15 | 639.1561 | -0.6 | 5.01 | +HCOO | 2644 |
| 376 | (-)-EC 3-O-p-coumaroate                                            | C27H30O15 | 639.1561 | -0.6 | 5.01 | +HCOO | 2644 |
| 377 | Puerin A                                                           | C27H30O15 | 639.1561 | -0.6 | 5.01 | +HCOO | 2644 |
| 378 | Lirioresinol A                                                     | C27H30O15 | 639.1561 | -0.6 | 5.01 | +HCOO | 2644 |
| 379 | Lactic acid                                                        | C27H30O15 | 639.1561 | -0.6 | 5.01 | +HCOO | 2644 |
| 380 | 2-Hexenal                                                          | C27H30O15 | 639.1561 | -0.6 | 5.01 | +HCOO | 2644 |
| 381 | Coumarin                                                           | C22H24O8  | 415.1403 | 0.5  | 6.98 | -H    | 2578 |
| 382 | Theanine                                                           | C14H14O6  | 323.0765 | -0.7 | 4.06 | +HCOO | 2560 |
| 383 | Me 3,4,5-triOH-benzoate                                            | C14H14O6  | 323.0765 | -0.7 | 4.06 | +HCOO | 2560 |
| 384 | Cinnamic acid                                                      | C21H20O14 | 495.0795 | 1.5  | 5.46 | -H    | 2228 |
| 385 | Ethyl 4-(sulfooxy)benzoate                                         | C21H20O14 | 495.0795 | 1.5  | 5.46 | -H    | 2228 |
| 386 | 6-carboxyMe-(+)-catechin                                           | C45H36O20 | 895.1741 | 1.3  | 5.34 | -H    | 2216 |
| 387 | Kaempferol-3-O-β-D-Glu-(1→3)-O-α-L-<br>Rha-(1→6)-O-C-D-Galactoside | C23H20O10 | 501.1039 | 0    | 4.46 | +HCOO | 2181 |
| 388 | Benzyl 2-neohesperidosyloxy-6-OH-<br>D-glucopyranoside             | C23H20O10 | 501.1039 | 0    | 4.46 | +HCOO | 2181 |
| 389 | 5-(3,8-diOH-1,5-diMe-6-<br>O-Me)-flavan-3-ol                       | C28H20O14 | 579.0803 | 2.3  | 8.28 | -H    | 2034 |
| 390 | Amelliaone D                                                       | C28H20O14 | 579.0803 | 2.3  | 8.28 | -H    | 2034 |
| 391 | Kaempferol 7-galactoside 3-rutinoside                              | C30H27O14 | 656.1376 | -0.7 | 3.98 | +HCOO | 1980 |
| 392 | Vitexin-2"-α-L-rhamnoside                                          | C30H27O14 | 656.1376 | -0.7 | 3.98 | +HCOO | 1980 |
| 393 | Assamicain A                                                       | C36H32O21 | 799.1381 | 1.8  | 5.2  | -H    | 1980 |
| 394 | Puerin VII                                                         | C42H46O22 | 947.2492 | 2.9  | 6.47 | +HCOO | 1921 |

|     |                                                |           |          |      |      |       |      |
|-----|------------------------------------------------|-----------|----------|------|------|-------|------|
| 395 | 1,3-di-O-G-4,6-(S)-HHDP-β-D-glu                | C24H20O10 | 513.1047 | 0.9  | 4.61 | +HCOO | 1856 |
| 396 | Chicoric acid                                  | C36H28O15 | 699.1366 | 1.1  | 6.07 | -H    | 1785 |
| 397 | 1,6-di-O-G-β-D-glu                             | C20H22O6  | 357.1363 | 1.9  | 5.83 | -H    | 1628 |
| 398 | Aminosalicyclic Acid                           | C20H22O6  | 357.1363 | 1.9  | 5.83 | -H    | 1628 |
| 399 | 2-Phenyl-2-butenal                             | C30H26O13 | 639.1372 | 1.6  | 8.63 | +HCOO | 1535 |
| 400 | Assamicain B                                   | C28H20O14 | 625.0848 | 1.3  | 5.81 | +HCOO | 1402 |
| 401 | 8-oxocaffeine                                  | C28H20O14 | 625.0848 | 1.3  | 5.81 | +HCOO | 1402 |
| 402 | 1,2-di-O-G-4,6-(S)-HHDP-β-D-glu                | C14H14O6  | 323.0766 | -0.6 | 3.76 | +HCOO | 1288 |
| 403 | Bis(8-epicatechiny)-methane                    | C14H14O6  | 323.0766 | -0.6 | 3.76 | +HCOO | 1288 |
| 404 | Benzylalcohol β-D-xyl-(1→6)-β-D-<br>-glucoside | C16H20O7  | 369.1218 | 2.7  | 4.46 | +HCOO | 1200 |
| 405 | Symplicosigenol                                | C15H14O8  | 367.0681 | 1    | 3.66 | +HCOO | 1152 |
| 406 | 1-(2-Hydroxy-5-<br>methoxymethyl)-methanone    | C16H18O8  | 383.096  | -2.4 | 4.84 | +HCOO | 1131 |
| 407 | N-(2-OH-phenyl)-2-pyrrolidinone                | C16H18O8  | 383.096  | -2.4 | 4.84 | +HCOO | 1131 |
| 408 | 5,7-diOH-coumarin                              | C16H18O8  | 383.096  | -2.4 | 4.84 | +HCOO | 1131 |
| 409 | Ethylbenzene                                   | C16H18O8  | 383.096  | -2.4 | 4.84 | +HCOO | 1131 |
| 410 | γ-Aminobutyric acid                            | C16H22O8  | 387.1323 | 2.6  | 4.09 | +HCOO | 958  |
| 411 | Ascorbic acid                                  | C26H32O11 | 565.1936 | 1    | 6.88 | +HCOO | 949  |
| 412 | Kaempferol-7-O-α-L-Rha-3-O-β-D-<br>-glucoside  | C19H28O10 | 461.1693 | 2.9  | 4.26 | +HCOO | 809  |
| 413 | 7-Me-xanthine                                  | C19H28O10 | 461.1693 | 2.9  | 4.26 | +HCOO | 809  |

**Supplementary Table 2. Primer sequences for qRT-PCR analysis, related to Figure 6, 8**

| Genes                           | Forward Primer Sequence   | Reverse Primer Sequence    |
|---------------------------------|---------------------------|----------------------------|
| <i>AhR</i>                      | ACCGGCTGAACACAGAGTTA      | CCATTCAGCGCCATCAAAGA       |
| <i>Cyp1a1</i>                   | CAGGCTGACTCTGAACTTGC      | AGACCAAGAGCTGATGCAGT       |
| <i>Pemt</i>                     | AGCAGAGAACTCGGAAGCTG      | CCAGGAAGTAGGTGGTGTGG       |
| <i>Fasn</i>                     | TCGGGTGTGGTGGGTTTGGT      | GCCGTGAGATGTGTTGCTGAGG     |
| <i>SREBP-1c</i>                 | AACCTCATCCGCCACCTGCT      | ATGGTAGACAACAGCCGCATCC     |
| <i>ACC-<math>\alpha</math></i>  | TTCACTGTGGCTTCTCCAGC      | GACCACCGACGGATAGATCG       |
| <i>PPAR-<math>\gamma</math></i> | AGCTCCAAGAATACCAAAGTGCGAT | AGGTTCTTCATGAGGCCTGTTGTAGA |
| <i>PPAR-<math>\alpha</math></i> | TTGAAGGAGCTTTGGGAAGA      | AGGAAGCCGTTCTGTGACAT       |
| <i>TNF-<math>\alpha</math></i>  | CGGGCAGGTCTACTTTGGAG      | CAGGTCACTGTCCCAGCATC       |
| <i>IL-6</i>                     | CTGCAAGTGCATCATCGTTGT     | CACTCACAAGTCGGAGGCT        |
| <i>IL-1<math>\beta</math></i>   | GGTGTGTGACGTTCCCATTA      | ATTGAGGTGGAGAGCTTTCAG      |
| <i><math>\beta</math>-actin</i> | GCTGTCCCTGTATGCCTCTG      | TGATGTCACGCACGATTTC        |

**Supplementary Table 3. Relative abundance of cecal microbiota in CD, HFD, and FBT groups**

| Microbiota                  | Relative abundance (%) |          |          |
|-----------------------------|------------------------|----------|----------|
|                             | CD                     | HFD      | FBT      |
|                             | <b>Phylum</b>          |          |          |
| Firmicutes                  | 0.594705               | 0.632083 | 0.594705 |
| Bacteroidetes               | 0.234763               | 0.185192 | 0.234763 |
| Deferribacteres             | 0.070418               | 0.084047 | 0.070418 |
| Actinobacteria              | 0.086591               | 0.043718 | 0.086591 |
| Ascomycota                  | 0.009706               | 0.032271 | 0.009706 |
| Proteobacteria              | 0.003181               | 0.021909 | 0.003181 |
| Basidiomycota               | 0.000197               | 0.000374 | main     |
| Spirochaetes                | 0.000232               | 0.000224 | 0.000232 |
| Synergistetes               | 7.76E-05               | 9.66E-05 | 7.76E-05 |
| unclassified                | 9.48E-05               | 3.27E-05 | 9.48E-05 |
| Deinococcus-Thermus         | 6.59E-06               | 2.31E-05 | 6.59E-06 |
| Verrucomicrobia             | 4.80E-06               | 7.68E-07 | 4.80E-06 |
| Cyanobacteria               | 8.73E-06               | 5.45E-06 | 8.73E-06 |
| Chloroflexi                 | 2.97E-06               | 9.77E-06 | 2.97E-06 |
| Candidatus_Saccharibacteria | 5.32E-06               | 2.88E-06 | 5.32E-06 |
| Fibrobacteres               | 1.84E-06               | 4.72E-06 | 1.84E-06 |
| Tenericutes                 | 1.03E-06               | 1.56E-06 | 1.03E-06 |
| Mucoromycota                | 7.55E-07               | 5.7E-07  | 7.55E-07 |
| Thermodesulfobacteria       | 1.48E-06               | 5.72E-07 | 1.48E-06 |
| Euryarchaeota               | 4.38E-07               | 1.14E-06 | 4.38E-07 |
| Fusobacteria                | 0                      | 0        | 0        |
| Planctomycetes              | 0                      | 0        | 0        |
| Chrysiogenetes              | 4.75E-07               | 0        | 4.75E-07 |

| Armatimonadetes | 0        | 5.04E-07 | 0        |
|-----------------|----------|----------|----------|
| <b>Genera</b>   |          |          |          |
| Dubosiella      | 0.263408 | 0.129452 | 0.013894 |
| Bacteroides     | 0.155345 | 0.14677  | 0.12413  |
| Lactobacillus   | 0.086526 | 0.049008 | 0.196164 |
| Mucispirillum   | 0.070418 | 0.084047 | 0.136883 |
| Eubacterium     | 0.065518 | 0.097616 | 0.100368 |
| Faecalibaculum  | 5.96E-06 | 0.119794 | 0.040603 |
| Parabacteroides | 0.066875 | 0.02953  | 0.04267  |
| unclassified    | 0.025436 | 0.039286 | 0.042033 |
| Lachnospirillum | 0.025505 | 0.040106 | 0.040575 |
| Acutalibacter   | 0.022676 | 0.035202 | 0.040127 |
| Corynebacterium | 0.064809 | 0.016345 | 0.004431 |
| Debaryomyces    | 0.008835 | 0.030771 | 0.047606 |
| Enterorhabdus   | 0.014326 | 0.023124 | 0.007646 |
| Staphylococcus  | 0.021779 | 0.003735 | 0.013367 |
| Blautia         | 0.008921 | 0.012723 | 0.012523 |
| Escherichia     | 0.002099 | 0.010946 | 0.016408 |
| Lactonifactor   | 0.004531 | 0.006982 | 0.007057 |
| Lactococcus     | 0.004506 | 0.006262 | 0.005999 |
| Clostridioides  | 0.003952 | 0.006899 | 0.005678 |
| Anaerotignum    | 0.003767 | 0.005547 | 0.006737 |
| Other           | 0.080763 | 0.105855 | 0.095102 |

|                                       |          |          |          |
|---------------------------------------|----------|----------|----------|
| <b>Species</b>                        |          |          |          |
| Dubosiella_newyorkensis               | 0.263408 | 0.129452 | 0.263408 |
| Mucispirillum_schaedleri              | 0.070418 | 0.084047 | 0.070418 |
| Bacteroides_thetaiotaomicron          | 0.098619 | 0.094354 | 0.098619 |
| Eubacterium_plexicaudatum             | 0.064362 | 0.096313 | 0.064362 |
| Lactobacillus_johnsonii               | 0.063908 | 0.018098 | 0.063908 |
| Faecalibaculum_rodentium              | 5.96E-06 | 0.119794 | 5.96E-06 |
| Parabacteroides_goldsteinii           | 0.06548  | 0.028824 | 0.06548  |
| Bacteroides_caecimuris                | 0.04431  | 0.032873 | 0.04431  |
| Acutalibacter_muris                   | 0.022676 | 0.035202 | 0.022676 |
| Debaryomyces_hansenii                 | 0.008291 | 0.029243 | 0.008291 |
| Lactobacillus_reuteri                 | 0.018535 | 0.006866 | 0.018535 |
| Corynebacterium_stationis             | 0.051764 | 0.007023 | 0.051764 |
| Hungateiclostridiaceae_bacterium_KB18 | 0.015079 | 0.025818 | 0.015079 |
| Lachnospirillum_sp._YL32              | 0.014096 | 0.021365 | 0.014096 |
| Lactobacillus_murinus                 | 0.002345 | 0.020169 | 0.002345 |
| Escherichia_coli                      | 0.002099 | 0.010933 | 0.002099 |
| Enterorhabdus_caecimuris              | 0.008702 | 0.014371 | 0.008702 |
| Corynebacterium_glutamicum            | 0.010749 | 0.008905 | 0.010749 |
| Staphylococcus_sciuri                 | 0.014896 | 0.001412 | 0.014896 |

|                             |          |          |          |
|-----------------------------|----------|----------|----------|
| Lactonifactor_longoviformis | 0.004531 | 0.006982 | 0.004531 |
| Other                       | 0.155726 | 0.207955 | 0.155726 |

Note: The microbiota in the cecum of mice were shown at the Phylum, Genera, and Species levels, respectively.

**Supplementary Table 4. Contents of Trp metabolites in cecal contents of mice showing differences between HFD and FBT groups**

| Metabolites                  | Contents (ng/g) |          |          | P value*   |             | Effect of FBT | HFD vs. CD |             | FBT vs. HFD |             |
|------------------------------|-----------------|----------|----------|------------|-------------|---------------|------------|-------------|-------------|-------------|
|                              | CD              | HFD      | FBT      | HFD vs. CD | FBT vs. HFD |               | Trend      | Fold change | Trend       | Fold change |
| 2-Aminobenzoicacid           | 294.00          | 491.40   | 238.80   | 0.023      | 0.006       | ★             | ↑*         | 1.67        | ↓**         | 0.49        |
| 5-Hydroxyindoleacetic acid   | 103.90          | 134.90   | 57.62    | 0.511      | 0.016       | ☆             | ↑          | 1.30        | ↓*          | 0.43        |
| 5-Hydroxytryptophol          | 33.43           | 22.88    | 30.46    | 0.179      | 0.418       |               | ↓          | 0.68        | ↑           | 1.33        |
| Indole-3-β-acrylic acid      | 10.30           | 5.11     | 8.67     | 0.059      | 0.004       | ☆             | ↓          | 0.50        | ↑**         | 1.70        |
| Indole-3-aceticacid          | 295.00          | 210.60   | 260.80   | 0.312      | 0.041       | ☆             | ↓          | 0.71        | ↑*          | 1.24        |
| Indole-3-carbaldehyde        | 571.50          | 229.80   | 225.00   | 0.004      | 0.998       |               | ↓**        | 0.40        | ↓           | 0.98        |
| Tryptophol                   | 21.10           | 12.90    | 8.64     | 0.030      | 0.346       |               | ↓*         | 0.61        | ↓           | 0.67        |
| Indole-3-lactic acid         | 41.52           | 18.06    | 14.27    | 0.366      | 0.974       |               | ↓          | 0.43        | ↓           | 0.79        |
| Indolylpropionic acid        | 372.83          | 173.80   | 271.60   | 0.001      | 0.009       | ★             | ↓**        | 0.47        | ↑*          | 1.56        |
| Kynurenic acid               | 119.93          | 62.96    | 77.28    | 0.032      | 0.028       | ★             | ↓*         | 0.52        | ↑*          | 1.23        |
| L-kynurenine                 | 57.85           | 56.68    | 22.26    | 0.996      | 0.004       |               | ↓          | 0.98        | ↓**         | 0.39        |
| L-tryptophan                 | 11765.00        | 12560.00 | 11840.00 | 0.828      | 0.868       |               | ↑          | 1.07        | ↓           | 0.94        |
| N-acetylserotonin(Melatonin) | 7.94            | 6.82     | 5.54     | 0.726      | 0.686       |               | ↓          | 0.86        | ↓           | 0.81        |
| N-formylkynurenine           | 107.73          | 116.64   | 120.72   | 0.845      | 0.032       |               | ↑          | 1.08        | ↑*          | 1.03        |
| Picolinic acid               | 781.50          | 335.40   | 217.96   | 0.340      | 0.928       |               | ↓          | 0.43        | ↓           | 0.65        |
| Xanthurenic acid             | 137.22          | 222.20   | 201.60   | 0.453      | 0.956       |               | ↑          | 1.62        | ↓           | 0.91        |
| 3-Hydroxyanthranilic acid    | 24.55           | 67.96    | 24.90    | 0.000      | 0.000       | ★             | ↑**        | 2.77        | ↓**         | 0.37        |

Note: Trend ↑, ↓ denote that the metabolite content increased and decreased, respectively. \* denotes that the difference is significant ( $p < 0.05$ ), \*\*denotes that the difference is highly significant ( $p < 0.01$ ), and \*\*\* denotes that the difference is highly significant ( $p < 0.001$ ).The metabolites significantly increased in group FBT or significantly decreased in group HFD, in which different changes of metabolites exist in FBT and CD groups compared with group HFD, are shown in red; On the contrary, the metabolites are shown in green; The metabolites significantly increased in group FBT while significantly decreased in group HFD are shown in red with "★". On the contrary, the metabolites are shown in green with "★". The metabolites shown in red or green towards or beyond the levels in group CD are signed

with "☆". Other metabolites that had no significant changes are shown in grey.

\*P values were calculated using Tukey's HSD test. Significant P values ( $< 0.05$ ) are shown in yellow.

**Supplementary Table 5. Differences in the abundance of KEGG Orthologs (KOs), KEGG Pathways, Enzymes, and microbial distribution of gut microbiota genes in different groups.**

| Pathway in KEGG | KO                                                     | A      | Distribution of microbes                                            | FBT              | HFD                                       | CD               |        |        |
|-----------------|--------------------------------------------------------|--------|---------------------------------------------------------------------|------------------|-------------------------------------------|------------------|--------|--------|
| K01696          | trpB                                                   |        |                                                                     | 31.815           | 47.177                                    | 52.173           |        |        |
|                 |                                                        |        | <i>g_Bacteroides.s_Bacteroides_thetaiotaomicron</i>                 | 6.0498           | 8.548                                     | 8.2338           |        |        |
|                 |                                                        |        | <i>g_Corynebacterium.s_Corynebacterium_glutamicum</i>               | 0.3372           | 0.9354                                    | 2.4737           |        |        |
|                 |                                                        |        | <i>g_Escherichia.s_Escherichia_coli</i>                             | 0.534            | 0.2566                                    | 0                |        |        |
|                 |                                                        |        | <i>g_Klebsiella.s_Klebsiella_pneumoniae</i>                         | 0                | 0.1626                                    | 0                |        |        |
|                 |                                                        |        | <i>g_Lactococcus.s_Lactococcus_lactis</i>                           | 0.5856           | 0.9806                                    | 1.1485           |        |        |
|                 |                                                        |        | <i>g_Parabacteroides.s_Parabacteroides_goldsteinii</i>              | 3.096            | 2.5282                                    | 6.1493           |        |        |
|                 |                                                        |        | <i>g_Proteus.s_Proteus_mirabilis</i>                                | 0.0286           | 0.0888                                    | 0                |        |        |
|                 |                                                        |        | <i>g_Staphylococcus.s_Staphylococcus_xylosum</i>                    | 0.6532           | 0.506                                     | 0.2772           |        |        |
|                 |                                                        |        | <i>g_Streptococcus.s_Streptococcus_thermophilus</i><br>unclassified | 0.4508<br>20.08  | 0.5542<br>32.617                          | 0.76<br>33.13    |        |        |
| K01626          | E2.5.1.54, aroF, aroG, aroH                            |        |                                                                     | 27.127           | 25.528                                    | 37.25            |        |        |
|                 |                                                        |        | <i>g_Aerococcus.s_Aerococcus_viridans</i>                           | 0                | 1.112                                     | 1.6147           |        |        |
|                 |                                                        |        | <i>g_Corynebacterium.s_Corynebacterium_glutamicum</i>               | 0.112            | 1.353                                     | 2.2442           |        |        |
|                 |                                                        |        | <i>g_Deбaryomyces.s_Deбaryomyces_hansenii</i>                       | 8.7804           | 6.2456                                    | 3.5137           |        |        |
|                 |                                                        |        | <i>g_Escherichia.s_Escherichia_coli</i>                             | 1.5134           | 1.4396                                    | 0.1195           |        |        |
|                 |                                                        |        | <i>g_Klebsiella.s_Klebsiella_pneumoniae</i>                         | 0                | 0.0692                                    | 0                |        |        |
|                 |                                                        |        | <i>g_Lactococcus.s_Lactococcus_lactis</i>                           | 1.3562           | 0.87                                      | 0.8307           |        |        |
|                 |                                                        |        | <i>g_Lactococcus.s_Lactococcus_raffinolactis</i>                    | 0.0434           | 0.1436                                    | 0.0907           |        |        |
|                 |                                                        |        | <i>g_Proteus.s_Proteus_mirabilis</i><br>unclassified                | 0.063<br>15.258  | 0.0944<br>14.201                          | 0<br>28.837      |        |        |
|                 |                                                        | K06001 | trpB                                                                |                  |                                           | 31.432           | 26.858 | 27.358 |
|                 | <i>g_Alistipes.s_Alistipes_shahii</i>                  |        |                                                                     | 0                | 0.5904                                    | 0.2633           |        |        |
|                 | <i>g_Parabacteroides.s_Parabacteroides_goldsteinii</i> |        |                                                                     | 3.3598           | 3.3782                                    | 6.2953           |        |        |
|                 | unclassified                                           |        |                                                                     | 28.073           | 22.889                                    | 20.799           |        |        |
| K00891          | E2.7.1.71, aroK, aroL                                  |        |                                                                     | 15.004           | 32.774                                    | 29.524           |        |        |
|                 |                                                        |        | <i>g_Alistipes.s_Alistipes_shahii</i>                               | 0                | 0.4958                                    | 0.0633           |        |        |
|                 |                                                        |        | <i>g_Bacteroides.s_Bacteroides_thetaiotaomicron</i>                 | 7.7996           | 11.57                                     | 11.47            |        |        |
|                 |                                                        |        | <i>g_Enterorhabdus.s_Enterorhabdus_caecimuris</i>                   | 3.4654           | 10.205                                    | 6.0993           |        |        |
|                 |                                                        |        | <i>g_Escherichia.s_Escherichia_coli</i>                             | 0.786            | 1.004                                     | 0.2067           |        |        |
|                 |                                                        |        | <i>g_Klebsiella.s_Klebsiella_pneumoniae</i>                         | 0                | 0.3844                                    | 0                |        |        |
|                 |                                                        |        | <i>g_Lactococcus.s_Lactococcus_lactis</i>                           | 0.5702           | 1.4076                                    | 0.9482           |        |        |
|                 |                                                        |        | <i>g_Streptococcus.s_Streptococcus_thermophilus</i><br>unclassified | 0.6622<br>1.7202 | 0.9092<br>6.7974                          | 0.3375<br>10.399 |        |        |
| K00014          | aroE                                                   |        |                                                                     | 15.523           | 24.639                                    | 31.492           |        |        |
|                 |                                                        |        | <i>g_Aerococcus.s_Aerococcus_viridans</i>                           | 0                | 0.8418                                    | 0.4803           |        |        |
|                 |                                                        |        | <i>g_Alistipes.s_Alistipes_shahii</i>                               | 0                | 0.5336                                    | 0.5717           |        |        |
|                 |                                                        |        | <i>g_Bacteroides.s_Bacteroides_thetaiotaomicron</i>                 | 6.9276           | 10.015                                    | 11.122           |        |        |
|                 |                                                        |        | <i>g_Corynebacterium.s_Corynebacterium_glutamicum</i>               | 0.2758           | 3.186                                     | 5.988            |        |        |
|                 |                                                        |        | <i>g_Escherichia.s_Escherichia_coli</i>                             | 1.1284           | 0.4262                                    | 0                |        |        |
|                 |                                                        |        | <i>g_Klebsiella.s_Klebsiella_pneumoniae</i>                         | 0                | 0.8528                                    | 0                |        |        |
|                 |                                                        |        | <i>g_Lactococcus.s_Lactococcus_lactis</i>                           | 0.7732           | 0.7414                                    | 0.7762           |        |        |
|                 |                                                        |        | <i>g_Lactococcus.s_Lactococcus_raffinolactis</i>                    | 0.1142           | 0                                         | 0                |        |        |
|                 |                                                        |        | <i>g_Proteus.s_Proteus_mirabilis</i>                                | 0.0882           | 0                                         | 0                |        |        |
|                 |                                                        |        | <i>g_Streptococcus.s_Streptococcus_thermophilus</i><br>unclassified | 0.489<br>5.7266  | 0.456<br>7.5854                           | 0.544<br>12.009  |        |        |
|                 |                                                        | K00817 | hisC                                                                |                  |                                           | 10.362           | 21.133 | 38.168 |
|                 |                                                        |        |                                                                     |                  | <i>g_Aerococcus.s_Aerococcus_viridans</i> | 0                | 0.6328 | 1.7332 |
|                 | <i>g_Bacteroides.s_Bacteroides_thetaiotaomicron</i>    |        |                                                                     | 5.15             | 9.6132                                    | 9.0522           |        |        |
|                 | <i>g_Corynebacterium.s_Corynebacterium_glutamicum</i>  |        |                                                                     | 0.239            | 2.5102                                    | 3.9158           |        |        |



|                    |                                                 |        |        |        |
|--------------------|-------------------------------------------------|--------|--------|--------|
|                    | g_Debaryomyces.s_Debaryomyces_hansenii          | 2.7528 | 2.2212 | 0.829  |
|                    | g_Escherichia.s_Escherichia_coli                | 0.4908 | 0.2128 | 0      |
|                    | g_Klebsiella.s_Klebsiella_pneumoniae            | 0      | 0.1496 | 0      |
|                    | g_Lactococcus.s_Lactococcus_lactis              | 0.2114 | 0.266  | 0.4857 |
|                    | g_Lactococcus.s_Lactococcus_raffinolactis       | 0.0314 | 0      | 0      |
|                    | g_Leuconostoc.s_Leuconostoc_mesenteroides       | 0.061  | 0.2146 | 0.1582 |
|                    | g_Proteus.s_Proteus_mirabilis                   | 0      | 0.091  | 0      |
|                    | g_Streptococcus.s_Streptococcus_thermophilus    | 0.033  | 0.425  | 0.3153 |
|                    | unclassified                                    | 1.3926 | 4.7966 | 21.678 |
| trpD               |                                                 | 14.494 | 25.95  | 30.123 |
|                    | g_Bacteroides.s_Bacteroides_thetaiotaomicron    | 5.449  | 8.8304 | 8.8435 |
|                    | g_Bacteroides.s_Bacteroides_uniformis           | 0      | 4.564  | 0      |
|                    | g_Corynebacterium.s_Corynebacterium_glutamicum  | 0.1188 | 0.891  | 2.1113 |
|                    | g_Debaryomyces.s_Debaryomyces_hansenii          | 2.9198 | 2.3314 | 0.7245 |
|                    | g_Lactococcus.s_Lactococcus_lactis              | 0.4876 | 1.126  | 0.7537 |
|                    | g_Lactococcus.s_Lactococcus_raffinolactis       | 0.033  | 0.075  | 0.1985 |
|                    | g_Leuconostoc.s_Leuconostoc_mesenteroides       | 0.1218 | 0      | 0.1763 |
|                    | g_Proteus.s_Proteus_mirabilis                   | 0.0702 | 0.035  | 0      |
|                    | g_Streptococcus.s_Streptococcus_thermophilus    | 0.6346 | 0.7968 | 0.5298 |
|                    | unclassified                                    | 4.6596 | 7.301  | 16.785 |
| aspB               |                                                 | 16.262 | 20.156 | 32.255 |
|                    | g_Bacteroides.s_Bacteroides_thetaiotaomicron    | 8.6694 | 10.529 | 12.25  |
|                    | g_Parabacteroides.s_Parabacteroides_goldsteinii | 3.3664 | 2.4702 | 6.2143 |
|                    | unclassified                                    | 4.226  | 7.1572 | 13.791 |
| trpE               |                                                 | 14.646 | 20.234 | 29.475 |
|                    | g_Aerococcus.s_Aerococcus_viridans              | 0.027  | 0.86   | 1.4242 |
|                    | g_Bacteroides.s_Bacteroides_thetaiotaomicron    | 5.1888 | 7.735  | 7.7562 |
|                    | g_Corynebacterium.s_Corynebacterium_glutamicum  | 0.0758 | 1.3506 | 2.1222 |
|                    | g_Debaryomyces.s_Debaryomyces_hansenii          | 3.039  | 2.2476 | 1.3235 |
|                    | g_Escherichia.s_Escherichia_coli                | 0.2474 | 0.2034 | 0.0188 |
|                    | g_Lactococcus.s_Lactococcus_lactis              | 0.6    | 0.3788 | 0.437  |
|                    | g_Lactococcus.s_Lactococcus_raffinolactis       | 0.023  | 0.0772 | 0.0695 |
|                    | g_Parabacteroides.s_Parabacteroides_goldsteinii | 2.6832 | 2.4706 | 5.8285 |
|                    | g_Streptococcus.s_Streptococcus_thermophilus    | 0.4648 | 0.4914 | 0.5732 |
|                    | unclassified                                    | 2.2968 | 4.4196 | 9.9212 |
| trpA               |                                                 | 11.536 | 16.922 | 26.959 |
|                    | g_Aerococcus.s_Aerococcus_viridans              | 0      | 0.2162 | 0.0855 |
|                    | g_Bacteroides.s_Bacteroides_thetaiotaomicron    | 6.5262 | 7.362  | 8.5285 |
|                    | g_Corynebacterium.s_Corynebacterium_glutamicum  | 0.209  | 1.8398 | 2.5397 |
|                    | g_Escherichia.s_Escherichia_coli                | 0.5918 | 0.4888 | 0.0808 |
|                    | g_Klebsiella.s_Klebsiella_pneumoniae            | 0      | 0.269  | 0      |
|                    | g_Lactococcus.s_Lactococcus_lactis              | 0.8568 | 0.8524 | 0.4255 |
|                    | g_Lactococcus.s_Lactococcus_raffinolactis       | 0.1064 | 0.0558 | 0.0975 |
|                    | g_Streptococcus.s_Streptococcus_thermophilus    | 0.264  | 0.5784 | 0.6127 |
|                    | unclassified                                    | 2.9816 | 5.2604 | 14.589 |
| K03856 AROA2, aroA |                                                 | 7.5588 | 20.011 | 20.643 |
|                    | g_Aerococcus.s_Aerococcus_viridans              | 0      | 0.9816 | 0.8027 |
|                    | g_Enterorhabdus.s_Enterorhabdus_caecimuris      | 2.8806 | 13.808 | 12.295 |
|                    | unclassified                                    | 4.6782 | 5.2212 | 7.5453 |
| aroB               |                                                 | 9.1962 | 14.598 | 21.387 |
|                    | g_Alistipes.s_Alistipes_shahii                  | 0      | 0.8806 | 0.1652 |
|                    | g_Bacteroides.s_Bacteroides_thetaiotaomicron    | 5.155  | 8.1184 | 9.5947 |
|                    | g_Corynebacterium.s_Corynebacterium_glutamicum  | 0.1186 | 1.0514 | 1.947  |
|                    | g_Enterococcus.s_Enterococcus_faecalis          | 0      | 0.0376 | 0.0573 |
|                    | g_Escherichia.s_Escherichia_coli                | 0.6352 | 0.6206 | 0.0283 |

|              |                                                  |        |        |        |
|--------------|--------------------------------------------------|--------|--------|--------|
|              | g_Klebsiella.s_Klebsiella_pneumoniae             | 0      | 0.415  | 0      |
|              | g_Lactococcus.s_Lactococcus_lactis               | 1.263  | 1.1992 | 0.6968 |
|              | g_Lactococcus.s_Lactococcus_raffinolactis        | 0      | 0.076  | 0.0318 |
|              | g_Leuconostoc.s_Leuconostoc_mesenteroides        | 0.1458 | 0.1414 | 0.1327 |
|              | g_Proteus.s_Proteus_mirabilis                    | 0.0946 | 0      | 0      |
|              | g_Streptococcus.s_Streptococcus_thermophilus     | 0.572  | 0.1738 | 0.821  |
|              | unclassified                                     | 1.212  | 1.8848 | 7.912  |
| E1.3.1.12    |                                                  | 8.8542 | 21.322 | 15.615 |
|              | g_Bacteroides.s_Bacteroides_thetaiotaomicron     | 6.0638 | 9.4488 | 9.6993 |
|              | g_Bacteroides.s_Bacteroides_uniformis            | 0      | 7.5008 | 0      |
|              | unclassified                                     | 2.7906 | 4.3728 | 5.9155 |
| trpC         |                                                  | 9.1382 | 13.945 | 17.925 |
|              | g_Aerococcus.s_Aerococcus_viridans               | 0      | 1.1548 | 0.6358 |
|              | g_Bacteroides.s_Bacteroides_thetaiotaomicron     | 7.163  | 8.2264 | 9.525  |
|              | g_Corynebacterium.s_Corynebacterium_glutamicum   | 0.1206 | 1.5994 | 2.5383 |
|              | g_Lactococcus.s_Lactococcus_lactis               | 0.8968 | 1.0024 | 0.3797 |
|              | g_Lactococcus.s_Lactococcus_raffinolactis        | 0      | 0      | 0.0472 |
|              | g_Leuconostoc.s_Leuconostoc_mesenteroides        | 0.1488 | 0.1452 | 0.0468 |
|              | g_Streptococcus.s_Streptococcus_thermophilus     | 0.4208 | 0.5076 | 0.6962 |
|              | unclassified                                     | 0.3884 | 1.3092 | 4.0555 |
| K01817 trpF  |                                                  | 9.1348 | 10.554 | 16.658 |
|              | g_Bacteroides.s_Bacteroides_thetaiotaomicron     | 5.2536 | 7.5238 | 9.2983 |
|              | g_Bifidobacterium.s_Bifidobacterium_pseudolongum | 0.1326 | 0.1436 | 0.7915 |
|              | g_Deбaryomyces.s_Deбaryomyces_hansenii           | 2.7146 | 1.964  | 0.9167 |
|              | g_Lactobacillus.s_Lactobacillus_helveticus       | 0.136  | 0      | 0      |
|              | g_Lactococcus.s_Lactococcus_lactis               | 0.4476 | 0.2736 | 0.7335 |
|              | g_Lactococcus.s_Lactococcus_raffinolactis        | 0.0816 | 0.0744 | 0.1248 |
|              | g_Leuconostoc.s_Leuconostoc_mesenteroides        | 0.306  | 0.07   | 0      |
|              | unclassified                                     | 0.0632 | 0.5046 | 4.7927 |
| K01736 aroC  |                                                  | 7.6754 | 8.8698 | 14.194 |
| map00400_    | g_Aerococcus.s_Aerococcus_viridans               | 0      | 0.6458 | 1.3542 |
| Phenylalani  | g_Alistipes.s_Alistipes_shahii                   | 0      | 0.3938 | 0.1445 |
| ne, tyrosine | g_Corynebacterium.s_Corynebacterium_glutamicum   | 0.1324 | 1.3988 | 2.105  |
| and          | g_Deбaryomyces.s_Deбaryomyces_hansenii           | 3.3638 | 2.1054 | 0.9215 |
| tryptophan   | g_Enterococcus.s_Enterococcus_faecalis           | 0      | 0      | 0.0262 |
| biosynthesis | g_Escherichia.s_Escherichia_coli                 | 0.3512 | 0.1898 | 0      |
|              | g_Klebsiella.s_Klebsiella_pneumoniae             | 0      | 0.3258 | 0      |
|              | g_Lactococcus.s_Lactococcus_lactis               | 0.5388 | 0.9412 | 0.9163 |
|              | g_Lactococcus.s_Lactococcus_raffinolactis        | 0.1108 | 0      | 0.056  |
|              | g_Leuconostoc.s_Leuconostoc_mesenteroides        | 0.1428 | 0.1596 | 0.2258 |
|              | g_Proteus.s_Proteus_mirabilis                    | 0.0318 | 0      | 0      |
|              | g_Staphylococcus.s_Staphylococcus_xylosus        | 0.8332 | 0.2028 | 0.175  |
|              | g_Streptococcus.s_Streptococcus_thermophilus     | 0.4592 | 0.46   | 0.5353 |
|              | unclassified                                     | 1.7116 | 2.0468 | 7.7342 |
| pheA2        |                                                  | 3.9556 | 4.8302 | 18.516 |
|              | g_Alistipes.s_Alistipes_shahii                   | 0      | 0.3216 | 0.296  |
|              | g_Corynebacterium.s_Corynebacterium_glutamicum   | 0.0446 | 1.0672 | 2.3065 |
|              | g_Deбaryomyces.s_Deбaryomyces_hansenii           | 3.114  | 2.0346 | 1.0438 |
|              | g_Enterococcus.s_Enterococcus_faecalis           | 0      | 0.0528 | 0      |
|              | g_Lactococcus.s_Lactococcus_lactis               | 0.7554 | 1.014  | 0.449  |
|              | g_Lactococcus.s_Lactococcus_raffinolactis        | 0.0416 | 0.0976 | 0      |
|              | unclassified                                     | 0      | 0.2424 | 14.421 |

|        |                                                  |        |        |        |        |
|--------|--------------------------------------------------|--------|--------|--------|--------|
|        | aroQ, qutE                                       |        | 4.6158 | 7.4694 | 9.6697 |
|        | g__Alistipes.s__Alistipes_shahii                 |        | 0      | 0.734  | 0.1898 |
|        | g__Corynebacterium.s__Corynebacterium_glutamicum |        | 0      | 0.9028 | 2.8365 |
|        | g__Debaryomyces.s__Debaryomyces_hansenii         |        | 2.8666 | 1.3988 | 1.3445 |
|        | g__Escherichia.s__Escherichia_coli               |        | 0      | 0.8452 | 0      |
|        | g__Klebsiella.s__Klebsiella_pneumoniae           |        | 0      | 0.098  | 0      |
|        | g__Proteus.s__Proteus_mirabilis                  |        | 0      | 0.1184 | 0      |
|        | unclassified                                     |        | 1.7494 | 3.3722 | 5.299  |
|        | aroA                                             |        | 2.614  | 4.825  | 11.958 |
|        | g__Aerococcus.s__Aerococcus_viridans             |        | 0.0626 | 0.9858 | 0.659  |
|        | g__Alistipes.s__Alistipes_shahii                 |        | 0      | 0.362  | 0.1883 |
|        | g__Corynebacterium.s__Corynebacterium_glutamicum |        | 0.11   | 1.3176 | 2.3    |
|        | g__Enterococcus.s__Enterococcus_faecalis         |        | 0      | 0      | 0.0235 |
|        | g__Escherichia.s__Escherichia_coli               |        | 0.5662 | 0.2878 | 0      |
|        | g__Klebsiella.s__Klebsiella_pneumoniae           |        | 0      | 0.1304 | 0      |
|        | g__Lactobacillus.s__Lactobacillus_delbrueckii    |        | 0.1806 | 0.174  | 0.3768 |
|        | g__Lactococcus.s__Lactococcus_lactis             |        | 0.649  | 0.8184 | 0.6213 |
|        | g__Lactococcus.s__Lactococcus_raffinolactis      |        | 0.025  | 0.0308 | 0.047  |
|        | g__Leuconostoc.s__Leuconostoc_mesenteroides      |        | 0.0332 | 0.0574 | 0.1488 |
|        | g__Proteus.s__Proteus_mirabilis                  |        | 0      | 0.0244 | 0      |
|        | g__Streptococcus.s__Streptococcus_thermophilus   |        | 0.3562 | 0.384  | 0.4647 |
|        | unclassified                                     |        | 0.6312 | 0.2524 | 7.1278 |
| K04516 | ARO1, aK04516                                    |        | 0.9422 | 11.055 | 3.1383 |
|        | g__Aerococcus.s__Aerococcus_viridans             |        | 0      | 0      | 0.5737 |
|        | g__Alistipes.s__Alistipes_shahii                 |        | 0      | 0.2144 | 0.1523 |
|        | g__Bacteroides.s__Bacteroides_uniformis          |        | 0      | 7.7084 | 0      |
|        | g__Lactococcus.s__Lactococcus_lactis             |        | 0      | 1.0724 | 0      |
|        | g__Streptococcus.s__Streptococcus_thermophilus   |        | 0      | 0.464  | 0.2362 |
|        | K04516unclassified                               |        | 0.9422 | 1.596  | 2.176  |
| K04517 | tyrA2                                            | K04517 | 2.181  | 2.8336 | 8.2035 |
|        | g__Alistipes.s__Alistipes_shahii                 |        | 0      | 0.7744 | 0.0863 |
|        | g__Enterococcus.s__Enterococcus_faecalis         |        | 0      | 0      | 0.0562 |
|        | g__Lactococcus.s__Lactococcus_lactis             |        | 0.97   | 0.4756 | 0.7765 |
|        | g__Lactococcus.s__Lactococcus_raffinolactis      |        | 0      | 0.0366 | 0.0917 |
|        | g__Leuconostoc.s__Leuconostoc_mesenteroides      |        | 0.1274 | 0.2388 | 0.1822 |
|        | g__Streptococcus.s__Streptococcus_thermophilus   |        | 0.7526 | 0.6024 | 0.5577 |
|        | K04517unclassified                               |        | 0.331  | 0.7058 | 6.453  |
| K13498 | trpCF                                            | K13498 | 0.7562 | 1.6804 | 8.952  |
|        | g__Corynebacterium.s__Corynebacterium_glutamicum |        | 0.116  | 1.3292 | 2.5003 |
|        | g__Escherichia.s__Escherichia_coli               |        | 0.6402 | 0.2772 | 0.0462 |
|        | g__Proteus.s__Proteus_mirabilis                  |        | 0      | 0.0738 | 0      |
|        | K13498unclassified                               |        | 0      | 0      | 6.4053 |
| K14454 | GOT1                                             | K14454 | 5.5876 | 4.6712 | 1.592  |
|        | g__Debaryomyces.s__Debaryomyces_hansenii         |        | 5.5876 | 4.6712 | 1.592  |
| K01658 | trpG                                             | K01658 | 0.6626 | 3.963  | 6.0403 |
|        | g__Aerococcus.s__Aerococcus_viridans             |        | 0      | 0.4232 | 0.5008 |
|        | g__Corynebacterium.s__Corynebacterium_glutamicum |        | 0      | 2.5478 | 2.0985 |
|        | g__Lactococcus.s__Lactococcus_lactis             |        | 0.4008 | 0.3558 | 0.5083 |
|        | g__Streptococcus.s__Streptococcus_thermophilus   |        | 0.2618 | 0.6362 | 0.3972 |
|        | K01658unclassified                               |        | 0      | 0      | 2.5353 |

|        |            |                                                |        |        |        |
|--------|------------|------------------------------------------------|--------|--------|--------|
| K03785 | aroD       | K03785                                         | 1.5392 | 3.657  | 2.254  |
|        |            | g__Aerococcus.s__Aerococcus_viridans           | 0      | 1.4014 | 1.0797 |
|        |            | g__Enterococcus.s__Enterococcus_faecalis       | 0      | 0.2008 | 0      |
|        |            | g__Escherichia.s__Escherichia_coli             | 0.7294 | 0.5978 | 0.0507 |
|        |            | g__Klebsiella.s__Klebsiella_pneumoniae         | 0      | 0.4318 | 0      |
|        |            | g__Lactococcus.s__Lactococcus_lactis           | 0.3698 | 0.2426 | 0.7055 |
|        |            | g__Streptococcus.s__Streptococcus_thermophilus | 0.4402 | 0.7824 | 0.4183 |
| K09484 | QUIB, qa-  | K09484                                         | 3.2946 | 2.6692 | 0.9063 |
|        |            | g__Debaryomyces.s__Debaryomyces_hansenii       | 3.2946 | 2.6692 | 0.9063 |
| K06209 | pheB       | K06209                                         | 1.5276 | 0.978  | 3.4633 |
|        |            | g__Lactobacillus.s__Lactobacillus_delbrueckii  | 0.0986 | 0.3692 | 0      |
|        |            | g__Staphylococcus.s__Staphylococcus_xylosus    | 0.46   | 0.6088 | 0.6692 |
|        |            | K06209unclassified                             | 0.969  | 0      | 2.7943 |
| K01656 | TRP3       | K01656                                         | 2.9892 | 2.1706 | 1.02   |
|        |            | g__Debaryomyces.s__Debaryomyces_hansenii       | 2.9892 | 2.1706 | 1.02   |
| K01850 | E5.4.99.5  | K01850                                         | 3.0248 | 1.8702 | 1.0093 |
|        |            | g__Debaryomyces.s__Debaryomyces_hansenii       | 3.0248 | 1.8702 | 1.0093 |
| K14455 | GOT2       | K14455                                         | 2.9728 | 1.7404 | 1.0493 |
|        |            | g__Debaryomyces.s__Debaryomyces_hansenii       | 2.9728 | 1.7404 | 1.0493 |
| K00838 | ARO8       | K00838                                         | 3.0582 | 1.7656 | 0.9483 |
|        |            | g__Debaryomyces.s__Debaryomyces_hansenii       | 3.0582 | 1.7656 | 0.9483 |
| K11358 | yhdR       | K11358                                         | 1.4092 | 2.0864 | 1.812  |
|        |            | K11358unclassified                             | 1.4092 | 2.0864 | 1.812  |
| K00211 | TYR1       | K00211                                         | 2.5762 | 1.9424 | 0.8172 |
|        |            | g__Debaryomyces.s__Debaryomyces_hansenii       | 2.5762 | 1.9424 | 0.8172 |
| K04093 | pheA1      | K04093                                         | 0      | 0.3    | 2.0758 |
|        |            | K04093unclassified                             | 0      | 0.3    | 2.0758 |
| K13853 | aroG, aroF | K13853                                         | 1.2188 | 0.4348 | 0.6207 |
|        |            | g__Staphylococcus.s__Staphylococcus_xylosus    | 0.9452 | 0.4348 | 0.444  |
|        |            | K13853unclassified                             | 0.2736 | 0      | 0.1765 |
| K14170 | pheA       | K14170                                         | 0.9188 | 1.0132 | 0      |
|        |            | g__Escherichia.s__Escherichia_coli             | 0.8894 | 0.4788 | 0      |
|        |            | g__Klebsiella.s__Klebsiella_pneumoniae         | 0      | 0.4162 | 0      |
|        |            | g__Proteus.s__Proteus_mirabilis                | 0.0296 | 0.118  | 0      |
| K00813 | aspC       | K00813                                         | 0.8554 | 0.7826 | 0      |
|        |            | g__Escherichia.s__Escherichia_coli             | 0.741  | 0.5322 | 0      |
|        |            | g__Klebsiella.s__Klebsiella_pneumoniae         | 0      | 0.1834 | 0      |
|        |            | g__Proteus.s__Proteus_mirabilis                | 0.1146 | 0.067  | 0      |
| K13497 | trpGD      | K13497                                         | 0.9528 | 0.2122 | 0.0763 |
|        |            | g__Escherichia.s__Escherichia_coli             | 0.4356 | 0.2122 | 0.0763 |
|        |            | K13497unclassified                             | 0.5172 | 0      | 0      |
| K00832 | tyrB       | K00832                                         | 0.3876 | 0.5968 | 0.1102 |
|        |            | g__Escherichia.s__Escherichia_coli             | 0.3876 | 0.2636 | 0.1102 |
|        |            | g__Klebsiella.s__Klebsiella_pneumoniae         | 0      | 0.3334 | 0      |

|        |                   |                                                |        |        |        |
|--------|-------------------|------------------------------------------------|--------|--------|--------|
| K05887 | ydiB              | K05887                                         | 0.5382 | 0.3806 | 0.1157 |
|        |                   | g_Escherichia.s_Escherichia_coli               | 0.5382 | 0.3806 | 0.1157 |
| K14187 | tyrA              | K14187                                         | 0.0596 | 0.5016 | 0      |
|        |                   | g_Escherichia.s_Escherichia_coli               | 0.0596 | 0.1046 | 0      |
|        |                   | g_Klebsiella.s_Klebsiella_pneumoniae           | 0      | 0.3664 | 0      |
|        |                   | g_Proteus.s_Proteus_mirabilis                  | 0      | 0.0306 | 0      |
| K01713 | pheC              | K01713                                         | 0      | 0.4388 | 0      |
|        |                   | g_Klebsiella.s_Klebsiella_pneumoniae           | 0      | 0.4388 | 0      |
| K00626 | E2.3.1.9, εK00626 | K00626                                         | 71.659 | 38.462 | 61.992 |
|        |                   | g_Aerococcus.s_Aerococcus_viridans             | 0      | 1.5938 | 2.1997 |
|        |                   | g_Corynebacterium.s_Corynebacterium_glutamicum | 0.2034 | 1.2244 | 2.2053 |
|        |                   | g_Debaryomyces.s_Debaryomyces_hansenii         | 2.8842 | 2.5722 | 1.175  |
|        |                   | g_Enterococcus.s_Enterococcus_faecalis         | 0      | 0.015  | 0      |
|        |                   | g_Escherichia.s_Escherichia_coli               | 0.9256 | 0.633  | 0      |
|        |                   | g_Klebsiella.s_Klebsiella_pneumoniae           | 0      | 0.3738 | 0      |
|        |                   | g_Lactobacillus.s_Lactobacillus_delbrueckii    | 0.2302 | 0.2006 | 0.0588 |
|        |                   | g_Lactobacillus.s_Lactobacillus_helveticus     | 0.0722 | 0.1626 | 0.0592 |
|        |                   | g_Lactobacillus.s_Lactobacillus_johnsonii      | 25.602 | 3.3042 | 16.588 |
|        |                   | g_Lactobacillus.s_Lactobacillus_reuteri        | 9.784  | 1.7638 | 6.3277 |
|        |                   | g_Lactococcus.s_Lactococcus_lactis             | 1.2286 | 1.3056 | 1.0962 |
|        |                   | K00626unclassified                             | 30.728 | 25.313 | 32.282 |
| K03781 | katE, CATK03781   | K03781                                         | 18.302 | 20.684 | 59.173 |
|        |                   | g_Alistipes.s_Alistipes_shahii                 | 0      | 0.361  | 0.2728 |
|        |                   | g_Bacteroides.s_Bacteroides_thetaiotaomicron   | 7.1974 | 9.6476 | 9.3595 |
|        |                   | g_Corynebacterium.s_Corynebacterium_glutamicum | 0.2342 | 1.5258 | 3.7257 |
|        |                   | g_Debaryomyces.s_Debaryomyces_hansenii         | 5.613  | 4.1308 | 2.1057 |
|        |                   | g_Enterococcus.s_Enterococcus_faecalis         | 0      | 0      | 0.0425 |
|        |                   | g_Proteus.s_Proteus_mirabilis                  | 0      | 0.0444 | 0      |
|        |                   | g_Staphylococcus.s_Staphylococcus_xylosum      | 1.8756 | 1.2384 | 0.7853 |
|        |                   | K03781unclassified                             | 3.3818 | 3.7354 | 42.882 |
| K00382 | DLD, lpd, K00382  | K00382                                         | 20.384 | 22.183 | 35.255 |
|        |                   | g_Aerococcus.s_Aerococcus_viridans             | 0.0282 | 1.1376 | 1.1237 |
|        |                   | g_Alistipes.s_Alistipes_shahii                 | 0      | 0.4702 | 0.1685 |
|        |                   | g_Bacteroides.s_Bacteroides_thetaiotaomicron   | 5.1822 | 7.1946 | 8.3845 |
|        |                   | g_Corynebacterium.s_Corynebacterium_glutamicum | 0.1736 | 1.419  | 2.1947 |
|        |                   | g_Debaryomyces.s_Debaryomyces_hansenii         | 3.4276 | 2.2896 | 1.013  |
|        |                   | g_Enterococcus.s_Enterococcus_faecalis         | 0      | 2.3126 | 0.0483 |
|        |                   | g_Escherichia.s_Escherichia_coli               | 0.9426 | 0.9026 | 0.0855 |
|        |                   | g_Klebsiella.s_Klebsiella_pneumoniae           | 0      | 0.2652 | 0      |
|        |                   | g_Lactobacillus.s_Lactobacillus_reuteri        | 6.6142 | 1.0754 | 3.6773 |
|        |                   | g_Lactococcus.s_Lactococcus_lactis             | 1.1106 | 0.8538 | 0.6305 |
|        |                   | g_Leuconostoc.s_Leuconostoc_mesenteroides      | 0.1454 | 0.1552 | 0.1507 |
|        |                   | g_Meyerozyma.s_Meyerozyma_guilliermondii       | 0.0224 | 0      | 0      |
|        |                   | g_Proteus.s_Proteus_mirabilis                  | 0      | 0.0206 | 0      |
|        |                   | g_Staphylococcus.s_Staphylococcus_xylosum      | 0.8618 | 0.5668 | 0.623  |
|        |                   | g_Streptococcus.s_Streptococcus_thermophilus   | 0.5502 | 0.3934 | 0.3417 |
|        |                   | K00382unclassified                             | 1.3252 | 3.126  | 16.813 |
| K01426 | E3.5.1.4, εK01426 | K01426                                         | 8.5404 | 18.224 | 20.424 |
|        |                   | g_Debaryomyces.s_Debaryomyces_hansenii         | 3.3212 | 2.1144 | 1.1428 |
|        |                   | g_Enterococcus.s_Enterococcus_faecalis         | 0.023  | 0.0268 | 0.061  |
|        |                   | g_Enterorhabdus.s_Enterorhabdus_caecimuris     | 4.3942 | 13.737 | 11.391 |

|                                      |           |                                                       |        |        |        |
|--------------------------------------|-----------|-------------------------------------------------------|--------|--------|--------|
|                                      |           | <i>g_Lactococcus.s_Lactococcus_lactis</i>             | 0.8028 | 0.7966 | 0.5038 |
|                                      |           | K01426unclassified                                    | 0      | 1.5484 | 7.3257 |
| K00128                               | ALDH      | K00128                                                | 12.097 | 10.635 | 16.006 |
|                                      |           | <i>g_Aerococcus.s_Aerococcus_viridans</i>             | 0.028  | 0.5772 | 1.2963 |
|                                      |           | <i>g_Alistipes.s_Alistipes_shahii</i>                 | 0      | 0.5984 | 0.0972 |
|                                      |           | <i>g_Deбaryomyces.s_Deбaryomyces_hansenii</i>         | 10.967 | 8.1784 | 3.5058 |
|                                      |           | <i>g_Meyerozyma.s_Meyerozyma_guilliermondii</i>       | 0.0394 | 0      | 0      |
|                                      |           | K00128unclassified                                    | 1.0616 | 1.2814 | 11.107 |
| K00658                               | DLST, suc | K00658                                                | 9.08   | 11.29  | 14.648 |
| map00380<br>Tryptophan<br>metabolism |           | <i>g_Bacteroides.s_Bacteroides_thetaiotaomicron</i>   | 4.4042 | 5.9994 | 8.263  |
|                                      |           | <i>g_Corynebacterium.s_Corynebacterium_glutamicum</i> | 0.0424 | 0.9532 | 1.6438 |
|                                      |           | <i>g_Deбaryomyces.s_Deбaryomyces_hansenii</i>         | 2.8102 | 2.486  | 1.03   |
|                                      |           | <i>g_Escherichia.s_Escherichia_coli</i>               | 0.8768 | 0.2882 | 0.0497 |
|                                      |           | <i>g_Klebsiella.s_Klebsiella_pneumoniae</i>           | 0      | 0.4956 | 0      |
|                                      |           | <i>g_Proteus.s_Proteus_mirabilis</i>                  | 0.0282 | 0.0524 | 0      |
|                                      |           | <i>g_Staphylococcus.s_Staphylococcus_xylosus</i>      | 0.7708 | 0.4642 | 0.3213 |
|                                      |           | K00658unclassified                                    | 0.1476 | 0.5502 | 3.3403 |
| K01667                               | tnaA      | K01667                                                | 9.4646 | 12.539 | 13.172 |
|                                      |           | <i>g_Alistipes.s_Alistipes_shahii</i>                 | 0      | 0.461  | 0.1218 |
|                                      |           | <i>g_Bacteroides.s_Bacteroides_thetaiotaomicron</i>   | 6.6412 | 8.6954 | 9.004  |
|                                      |           | <i>g_Escherichia.s_Escherichia_coli</i>               | 0.183  | 0.2142 | 0.0243 |
|                                      |           | K01667unclassified                                    | 2.6404 | 3.1686 | 4.0212 |
|                                      |           | K01668                                                | 0      | 0      | 0.2745 |
|                                      |           | K01668unclassified                                    | 0      | 0      | 0.2745 |
| K00252                               | GCDH, gc  | K00252                                                | 0      | 1.8814 | 4.1343 |
|                                      |           | <i>g_Corynebacterium.s_Corynebacterium_glutamicum</i> | 0      | 1.6702 | 2.4693 |
|                                      |           | K00252unclassified                                    | 0      | 0.2112 | 1.665  |
| K01501                               | E3.5.5.1  | K01501                                                | 3.0802 | 2.2116 | 1.0432 |
|                                      |           | <i>g_Deбaryomyces.s_Deбaryomyces_hansenii</i>         | 3.0802 | 2.2116 | 1.0432 |
| K01556                               | KYNU, ky  | K01556                                                | 2.7906 | 2.0804 | 1.301  |
|                                      |           | <i>g_Deбaryomyces.s_Deбaryomyces_hansenii</i>         | 2.7906 | 2.0804 | 1.301  |
| K00838                               | ARO8      | K00838                                                | 3.0582 | 1.7656 | 0.9483 |
|                                      |           | <i>g_Deбaryomyces.s_Deбaryomyces_hansenii</i>         | 3.0582 | 1.7656 | 0.9483 |
| K00486                               | KMO       | K00486                                                | 3.0524 | 1.7128 | 0.8245 |
|                                      |           | <i>g_Deбaryomyces.s_Deбaryomyces_hansenii</i>         | 3.0274 | 1.7128 | 0.8245 |
|                                      |           | <i>g_Meyerozyma.s_Meyerozyma_guilliermondii</i>       | 0.0248 | 0      | 0      |
| K14264                               | BNA3      | K14264                                                | 2.7138 | 1.5658 | 1.0593 |
|                                      |           | <i>g_Deбaryomyces.s_Deбaryomyces_hansenii</i>         | 2.6894 | 1.5658 | 1.0593 |
|                                      |           | <i>g_Meyerozyma.s_Meyerozyma_guilliermondii</i>       | 0.0244 | 0      | 0      |
| K04103                               | ipdC      | K04103                                                | 0.666  | 1.4318 | 2.8198 |
|                                      |           | <i>g_Escherichia.s_Escherichia_coli</i>               | 0      | 0.4156 | 0      |
|                                      |           | <i>g_Klebsiella.s_Klebsiella_pneumoniae</i>           | 0      | 0.3818 | 0      |
|                                      |           | <i>g_Lactococcus.s_Lactococcus_lactis</i>             | 0.666  | 0.3762 | 0.2273 |
|                                      |           | K04103unclassified                                    | 0      | 0.2584 | 2.5922 |
| K14263                               | BNA7      | K14263                                                | 2.3802 | 1.8398 | 0.9617 |
|                                      |           | <i>g_Deбaryomyces.s_Deбaryomyces_hansenii</i>         | 2.3802 | 1.8398 | 0.9617 |

|        |            |                                                |        |        |        |
|--------|------------|------------------------------------------------|--------|--------|--------|
| K00463 | IDO, IND   | K00463                                         | 2.7812 | 1.6016 | 0.7082 |
|        |            | g_Debaryomyces.s_Debaryomyces_hansenii         | 2.7812 | 1.6016 | 0.7082 |
| K00452 | HAAO       | K00452                                         | 1.869  | 1.9226 | 0.9922 |
|        |            | g_Debaryomyces.s_Debaryomyces_hansenii         | 1.869  | 1.9226 | 0.9922 |
| K01692 | paaF, echA | K01692                                         | 0.2932 | 0.1938 | 2.012  |
|        |            | g_Escherichia.s_Escherichia_coli               | 0.2932 | 0.1938 | 0.0903 |
|        |            | K01692unclassified                             | 0      | 0      | 1.9218 |
| K01782 | fadJ       | K01782                                         | 0.3478 | 0.1278 | 0      |
|        |            | g_Escherichia.s_Escherichia_coli               | 0.2892 | 0.0956 | 0      |
|        |            | g_Proteus.s_Proteus_mirabilis                  | 0.0586 | 0.032  | 0      |
| K06131 | clsA_B     | K06131                                         | 88.314 | 45.077 | 81.625 |
|        |            | g_Aerococcus.s_Aerococcus_viridans             | 0      | 0.663  | 0.8388 |
|        |            | g_Alistipes.s_Alistipes_finegoldii             | 0      | 0.0294 | 0      |
|        |            | g_Alistipes.s_Alistipes_shahii                 | 0      | 0.4566 | 0.1838 |
|        |            | g_Bacteroides.s_Bacteroides_thetaiotaomicron   | 13.196 | 19.634 | 18.844 |
|        |            | g_Enterococcus.s_Enterococcus_faecalis         | 0.0682 | 0.0634 | 0      |
|        |            | g_Escherichia.s_Escherichia_coli               | 0.67   | 0.827  | 0.1658 |
|        |            | g_Klebsiella.s_Klebsiella_pneumoniae           | 0      | 0.6758 | 0      |
|        |            | g_Lactobacillus.s_Lactobacillus_delbrueckii    | 0.508  | 0.2598 | 0.2557 |
|        |            | g_Lactobacillus.s_Lactobacillus_helveticus     | 0.117  | 0.0706 | 0.0228 |
|        |            | g_Lactobacillus.s_Lactobacillus_johnsonii      | 48.183 | 7.3442 | 33.599 |
|        |            | g_Lactobacillus.s_Lactobacillus_reuteri        | 17.341 | 2.913  | 10.297 |
|        |            | g_Lactococcus.s_Lactococcus_lactis             | 1.0076 | 1.1726 | 0.9195 |
|        |            | g_Proteus.s_Proteus_mirabilis                  | 0.0228 | 0      | 0      |
|        |            | g_Staphylococcus.s_Staphylococcus_xylosus      | 0.6412 | 0.5118 | 0.3603 |
|        |            | g_Streptococcus.s_Streptococcus_thermophilus   | 0.185  | 0.665  | 0.287  |
|        |            | K06131unclassified                             | 6.3734 | 9.7904 | 15.851 |
| K01126 | E3.1.4.46, | K01126                                         | 51.848 | 33.236 | 67.232 |
|        |            | g_Alistipes.s_Alistipes_shahii                 | 0      | 1.2402 | 0.5418 |
|        |            | g_Bacteroides.s_Bacteroides_thetaiotaomicron   | 6.2548 | 7.9858 | 8.3635 |
|        |            | g_Blautia.s_Ruminococcus_torques               | 0      | 0.2258 | 2.3923 |
|        |            | g_Clostridium.s_Clostridium_sp_ASF502          | 0      | 1.5158 | 0.6612 |
|        |            | g_Corynebacterium.s_Corynebacterium_glutamicum | 0.1896 | 2.4224 | 4.589  |
|        |            | g_Dorea.s_Dorea_sp_5_2                         | 0.0958 | 2.7052 | 3.2473 |
|        |            | g_Enterococcus.s_Enterococcus_faecalis         | 0.036  | 0.1108 | 0.016  |
|        |            | g_Escherichia.s_Escherichia_coli               | 1.1274 | 0.8394 | 0.0733 |
|        |            | g_Lactobacillus.s_Lactobacillus_delbrueckii    | 0.234  | 0.2802 | 0.1467 |
|        |            | g_Lactobacillus.s_Lactobacillus_helveticus     | 0.2286 | 0.0454 | 0      |
|        |            | g_Lactobacillus.s_Lactobacillus_johnsonii      | 28.182 | 4.2236 | 17.028 |
|        |            | g_Lactobacillus.s_Lactobacillus_reuteri        | 9.1068 | 1.4842 | 5.2615 |
|        |            | g_Lactococcus.s_Lactococcus_lactis             | 1.1026 | 1.291  | 0.9018 |
|        |            | g_Lactococcus.s_Lactococcus_raffinolactis      | 0      | 0.0452 | 0      |
|        |            | g_Leuconostoc.s_Leuconostoc_mesenteroides      | 0.1358 | 0.1506 | 0.261  |
|        |            | g_Proteus.s_Proteus_mirabilis                  | 0.0526 | 0.0376 | 0      |
|        |            | K01126unclassified                             | 5.102  | 8.6328 | 23.748 |
| K00995 | pgsA, PG   | K00995                                         | 54.604 | 28.481 | 59.986 |
|        |            | g_Aerococcus.s_Aerococcus_viridans             | 0      | 0.6474 | 1.0432 |
|        |            | g_Bacteroides.s_Bacteroides_thetaiotaomicron   | 5.1292 | 7.4632 | 9.5252 |
|        |            | g_Corynebacterium.s_Corynebacterium_glutamicum | 0.2088 | 0.7138 | 1.8492 |
|        |            | g_Debaryomyces.s_Debaryomyces_hansenii         | 2.352  | 1.6452 | 0.6413 |
|        |            | g_Escherichia.s_Escherichia_coli               | 0.5864 | 0.334  | 0.133  |
|        |            | g_Lactobacillus.s_Lactobacillus_delbrueckii    | 0.2116 | 0.2988 | 0.205  |
|        |            | g_Lactobacillus.s_Lactobacillus_johnsonii      | 21.08  | 3.65   | 17.066 |
|        |            | g_Lactobacillus.s_Lactobacillus_reuteri        | 5.8286 | 1.313  | 3.5797 |

|        |                   |                                                 |        |        |        |
|--------|-------------------|-------------------------------------------------|--------|--------|--------|
|        |                   | g_Lactococcus.s_Lactococcus_lactis              | 0.8592 | 0.591  | 0.7885 |
|        |                   | g_Lactococcus.s_Lactococcus_raffinolactis       | 0      | 0.0854 | 0      |
|        |                   | K00995unclassified                              | 18.348 | 11.74  | 25.155 |
| K01613 | psd, PISD K01613  |                                                 | 29.798 | 22.153 | 26.703 |
|        |                   | g_Alistipes.s_Alistipes_shahii                  | 0      | 0.5322 | 0.3233 |
|        |                   | g_Bacteroides.s_Bacteroides_thetaiotaomicron    | 5.8098 | 8.7684 | 10.218 |
|        |                   | g_Debaryomyces.s_Debaryomyces_hansenii          | 5.8826 | 3.9758 | 1.7333 |
|        |                   | g_Escherichia.s_Escherichia_coli                | 0.0344 | 0.0338 | 0      |
|        |                   | g_Klebsiella.s_Klebsiella_pneumoniae            | 0      | 0.506  | 0      |
|        |                   | g_Lactobacillus.s_Lactobacillus_helveticus      | 0.1946 | 0.4816 | 0      |
|        |                   | g_Lactobacillus.s_Lactobacillus_johnsonii       | 10.56  | 1.2434 | 0      |
|        |                   | g_Meyerozyma.s_Meyerozyma_guilliermondii        | 0.0178 | 0      | 0      |
|        |                   | g_Parabacteroides.s_Parabacteroides_goldsteinii | 3.7938 | 2.9352 | 7.8928 |
|        |                   | K01613unclassified                              | 3.5048 | 3.6756 | 6.536  |
| K00057 | gpsA K00057       |                                                 | 32.741 | 12.447 | 30.361 |
|        |                   | g_Aerococcus.s_Aerococcus_viridans              | 0      | 1.074  | 0.7863 |
|        |                   | g_Corynebacterium.s_Corynebacterium_glutamicum  | 0.0836 | 1.2054 | 2.3425 |
|        |                   | g_Enterococcus.s_Enterococcus_faecalis          | 0      | 0.1964 | 0      |
|        |                   | g_Klebsiella.s_Klebsiella_pneumoniae            | 0      | 0.4316 | 0      |
|        |                   | g_Lactobacillus.s_Lactobacillus_delbrueckii     | 0.5346 | 0.9898 | 0.4918 |
|        |                   | g_Lactobacillus.s_Lactobacillus_helveticus      | 0.044  | 0.085  | 0      |
|        |                   | g_Lactobacillus.s_Lactobacillus_johnsonii       | 20.604 | 3.8022 | 14.256 |
|        |                   | g_Lactobacillus.s_Lactobacillus_reuteri         | 8.0778 | 1.3408 | 5.244  |
|        |                   | g_Lactococcus.s_Lactococcus_lactis              | 0.6344 | 0.6876 | 0.7302 |
|        |                   | g_Lactococcus.s_Lactococcus_raffinolactis       | 0.0862 | 0      | 0.0298 |
|        |                   | g_Leuconostoc.s_Leuconostoc_mesenteroides       | 0.0764 | 0.0414 | 0.264  |
|        |                   | g_Proteus.s_Proteus_mirabilis                   | 0      | 0.032  | 0      |
|        |                   | g_Staphylococcus.s_Staphylococcus_xylosus       | 0.1938 | 0.2284 | 0.1402 |
|        |                   | g_Streptococcus.s_Streptococcus_thermophilus    | 0.3832 | 0.9912 | 0.5807 |
|        |                   | K00057unclassified                              | 2.0244 | 1.341  | 5.495  |
| K00981 | E2.7.7.41, K00981 |                                                 | 17.17  | 20.344 | 25.016 |
|        |                   | g_Aerococcus.s_Aerococcus_viridans              | 0      | 1.0966 | 0.2458 |
|        |                   | g_Alistipes.s_Alistipes_shahii                  | 0      | 0.8362 | 0.4265 |
|        |                   | g_Bacteroides.s_Bacteroides_thetaiotaomicron    | 6.2272 | 9.4034 | 9.9072 |
|        |                   | g_Corynebacterium.s_Corynebacterium_glutamicum  | 0.1508 | 1.459  | 1.6653 |
|        |                   | g_Debaryomyces.s_Debaryomyces_hansenii          | 2.2532 | 1.5398 | 1.1855 |
|        |                   | g_Escherichia.s_Escherichia_coli                | 0.7878 | 0.9512 | 0.2237 |
|        |                   | g_Klebsiella.s_Klebsiella_pneumoniae            | 0      | 0.7928 | 0      |
|        |                   | g_Lactobacillus.s_Lactobacillus_delbrueckii     | 0.0636 | 0.363  | 0.082  |
|        |                   | g_Lactobacillus.s_Lactobacillus_helveticus      | 0.0574 | 0.097  | 0.1195 |
|        |                   | g_Lactobacillus.s_Lactobacillus_reuteri         | 5.7068 | 0.8142 | 3.4018 |
|        |                   | g_Lactococcus.s_Lactococcus_lactis              | 0.564  | 0.9106 | 0.8793 |
|        |                   | g_Lactococcus.s_Lactococcus_raffinolactis       | 0.131  | 0      | 0      |
|        |                   | g_Proteus.s_Proteus_mirabilis                   | 0.0418 | 0.0416 | 0      |
|        |                   | g_Staphylococcus.s_Staphylococcus_xylosus       | 0.399  | 0.0988 | 0.1795 |
|        |                   | K00981unclassified                              | 0.7874 | 1.9396 | 6.7003 |
| K00980 | tagD K00980       |                                                 | 27.353 | 9.6912 | 22.276 |
|        |                   | g_Lactobacillus.s_Lactobacillus_johnsonii       | 19.603 | 4.0966 | 15.301 |
|        |                   | g_Lactococcus.s_Lactococcus_lactis              | 0.4604 | 0.872  | 1.1827 |
|        |                   | g_Staphylococcus.s_Staphylococcus_xylosus       | 0.682  | 0.868  | 0.239  |
|        |                   | K00980unclassified                              | 6.6072 | 3.8546 | 5.5532 |
| K08591 | plsY K08591       |                                                 | 25.861 | 8.264  | 21.157 |
|        |                   | g_Alistipes.s_Alistipes_shahii                  | 0      | 0.2476 | 0.1083 |
|        |                   | g_Escherichia.s_Escherichia_coli                | 0.7004 | 0.4512 | 0      |
|        |                   | g_Klebsiella.s_Klebsiella_pneumoniae            | 0      | 0.0742 | 0      |
|        |                   | g_Lactobacillus.s_Lactobacillus_delbrueckii     | 0.313  | 0.132  | 0.145  |
|        |                   | g_Lactobacillus.s_Lactobacillus_helveticus      | 0      | 0.4224 | 0      |
|        |                   | g_Lactobacillus.s_Lactobacillus_johnsonii       | 16.917 | 3.58   | 13.021 |



|             |            |           |                                              |        |        |        |
|-------------|------------|-----------|----------------------------------------------|--------|--------|--------|
|             |            |           | g_Lactobacillus.s_Lactobacillus_reuteri      | 5.7752 | 1.0254 | 3.088  |
|             |            |           | g_Lactococcus.s_Lactococcus_lactis           | 0.5676 | 0.7956 | 0.5643 |
|             |            |           | g_Proteus.s_Proteus_mirabilis                | 0.1174 | 0.2676 | 0      |
|             |            |           | g_Staphylococcus.s_Staphylococcus_xylosus    | 0.9912 | 0.5606 | 0.3687 |
|             |            |           | g_Streptococcus.s_Streptococcus_thermophilus | 0.277  | 0.2702 | 0.7405 |
|             |            |           | K08591unclassified                           | 0.2024 | 0.4366 | 3.1213 |
| K01114      | plc        |           | K01114                                       | 9.2028 | 11.2   | 10.524 |
|             |            |           | K01114unclassified                           | 9.2028 | 11.2   | 10.524 |
| K01095      | pgpA       |           | K01095                                       | 7.7636 | 10.376 | 7.7877 |
|             |            |           | g_Bacteroides.s_Bacteroides_thetaiotaomicron | 7.0472 | 9.804  | 7.7877 |
|             |            |           | g_Escherichia.s_Escherichia_coli             | 0.7164 | 0.5718 | 0      |
| K00655      | plsC       |           | K00655                                       | 9.0454 | 5.5046 | 8.4447 |
|             |            |           | g_Aerococcus.s_Aerococcus_viridans           | 0      | 0.7004 | 0.5685 |
|             |            |           | g_Escherichia.s_Escherichia_coli             | 1.1106 | 0.7832 | 0.1133 |
|             |            |           | g_Klebsiella.s_Klebsiella_pneumoniae         | 0      | 0.4046 | 0      |
|             |            |           | g_Lactobacillus.s_Lactobacillus_delbrueckii  | 0.0822 | 0.064  | 0      |
|             |            |           | g_Lactobacillus.s_Lactobacillus_helveticus   | 0.064  | 0.0794 | 0.1307 |
|             |            |           | g_Lactobacillus.s_Lactobacillus_reuteri      | 5.6006 | 0.4466 | 2.962  |
|             |            |           | g_Lactococcus.s_Lactococcus_raffinolactis    | 0      | 0      | 0.0452 |
|             |            |           | g_Leuconostoc.s_Leuconostoc_mesenteroides    | 0.1948 | 0.0736 | 0.1862 |
|             |            |           | g_Proteus.s_Proteus_mirabilis                | 0      | 0.1076 | 0      |
|             |            |           | g_Streptococcus.s_Streptococcus_thermophilus | 0.5224 | 0.6664 | 0.381  |
|             |            |           | K00655unclassified                           | 1.471  | 2.1788 | 4.058  |
| map00564_   | K17103     | CHO1, ps: | K17103                                       | 7.256  | 6.8294 | 8.4938 |
| Glycerophos |            |           | g_Alistipes.s_Alistipes_shahii               | 0      | 0.3564 | 0.2107 |
| pholipid    |            |           | g_Debaryomyces.s_Debaryomyces_hansenii       | 2.5182 | 2.433  | 1.4662 |
| metabolism  |            |           | K17103unclassified                           | 4.7376 | 4.0398 | 6.8168 |
|             | K07029     | dagK      | K07029                                       | 8.2816 | 2.887  | 5.9858 |
|             |            |           | g_Lactobacillus.s_Lactobacillus_helveticus   | 0.0366 | 0.141  | 0      |
|             |            |           | g_Lactobacillus.s_Lactobacillus_reuteri      | 6.9958 | 1.442  | 4.5962 |
|             |            |           | g_Lactococcus.s_Lactococcus_lactis           | 0.8436 | 0.608  | 0.7198 |
|             |            |           | g_Leuconostoc.s_Leuconostoc_mesenteroides    | 0.156  | 0.1506 | 0.1015 |
|             |            |           | g_Staphylococcus.s_Staphylococcus_xylosus    | 0.2496 | 0.5452 | 0.5682 |
| K13333      | PLB        |           | K13333                                       | 7.935  | 6.0332 | 2.5862 |
|             |            |           | g_Debaryomyces.s_Debaryomyces_hansenii       | 7.935  | 6.0332 | 2.5862 |
| K00111      | glpA, glpI |           | K00111                                       | 3.1708 | 3.929  | 6.297  |
|             |            |           | g_Escherichia.s_Escherichia_coli             | 1.2492 | 1.2856 | 0.155  |
|             |            |           | g_Klebsiella.s_Klebsiella_pneumoniae         | 0      | 0.8344 | 0      |
|             |            |           | g_Lactococcus.s_Lactococcus_lactis           | 0.5672 | 0.6464 | 0.67   |
|             |            |           | g_Meyerozyma.s_Meyerozyma_guilliermondii     | 0.0496 | 0      | 0      |
|             |            |           | g_Proteus.s_Proteus_mirabilis                | 0      | 0.0688 | 0      |
|             |            |           | g_Staphylococcus.s_Staphylococcus_xylosus    | 0.7594 | 0.4252 | 0.4198 |
|             |            |           | K00111unclassified                           | 0.5454 | 0.6686 | 5.0525 |
| K00006      | GPD1       |           | K00006                                       | 6.5314 | 5.0932 | 2.4342 |
|             |            |           | g_Debaryomyces.s_Debaryomyces_hansenii       | 6.5006 | 5.0932 | 2.4342 |
|             |            |           | g_Meyerozyma.s_Meyerozyma_guilliermondii     | 0.0308 | 0      | 0      |
| K13535      | CLD1       |           | K13535                                       | 5.8078 | 4.288  | 2.072  |
|             |            |           | g_Debaryomyces.s_Debaryomyces_hansenii       | 5.8078 | 4.288  | 2.072  |
| K13507      | GAT        |           | K13507                                       | 5.7308 | 4.5508 | 1.7133 |
|             |            |           | g_Debaryomyces.s_Debaryomyces_hansenii       | 5.7    | 4.5508 | 1.7133 |
|             |            |           | g_Meyerozyma.s_Meyerozyma_guilliermondii     | 0.0308 | 0      | 0      |
| K18693      | DPP1, DP   |           | K18693                                       | 6.2078 | 4.174  | 1.5298 |
|             |            |           | g_Debaryomyces.s_Debaryomyces_hansenii       | 6.2078 | 4.174  | 1.5298 |
| K03735      | eutB       |           | K03735                                       | 1.88   | 2.5192 | 2.7162 |
|             |            |           | g_Escherichia.s_Escherichia_coli             | 0.505  | 0.5666 | 0.0745 |
|             |            |           | g_Klebsiella.s_Klebsiella_pneumoniae         | 0      | 0.204  | 0      |
|             |            |           | K03735unclassified                           | 1.3746 | 1.7484 | 2.6417 |
| K13509      | AGPAT1_    |           | K13509                                       | 3.2258 | 2.6266 | 0.752  |

|        |          |                                           |        |        |        |
|--------|----------|-------------------------------------------|--------|--------|--------|
|        |          | g_Debaryomyces.s__Debaryomyces_hansenii   | 3.2258 | 2.6266 | 0.752  |
| K00993 | EPT1     | K00993                                    | 3.6154 | 2.0704 | 0.7713 |
|        |          | g_Debaryomyces.s__Debaryomyces_hansenii   | 3.6154 | 2.0704 | 0.7713 |
| K00967 | PCYT2    | K00967                                    | 2.6716 | 1.843  | 1.5295 |
|        |          | g_Debaryomyces.s__Debaryomyces_hansenii   | 2.6716 | 1.843  | 1.5295 |
| K16369 | CHO2     | K16369                                    | 2.7998 | 2.2526 | 1.0283 |
|        |          | g_Debaryomyces.s__Debaryomyces_hansenii   | 2.7998 | 2.2526 | 1.0283 |
| K00866 | CKI1     | K00866                                    | 2.9202 | 1.9302 | 1.0773 |
|        |          | g_Debaryomyces.s__Debaryomyces_hansenii   | 2.9202 | 1.9302 | 1.0773 |
| K00968 | PCYT1    | K00968                                    | 2.9208 | 2.2294 | 0.8008 |
|        |          | g_Debaryomyces.s__Debaryomyces_hansenii   | 2.9208 | 2.2294 | 0.8008 |
| K13511 | TAZ      | K13511                                    | 2.652  | 2.1168 | 1.1073 |
|        |          | g_Debaryomyces.s__Debaryomyces_hansenii   | 2.652  | 2.1168 | 1.1073 |
| K06123 | AYR1     | K06123                                    | 2.4698 | 2.7502 | 0.6747 |
|        |          | g_Debaryomyces.s__Debaryomyces_hansenii   | 2.4698 | 2.7502 | 0.6747 |
| K18694 | PGC1     | K18694                                    | 2.6474 | 1.9588 | 1.1157 |
|        |          | g_Debaryomyces.s__Debaryomyces_hansenii   | 2.6474 | 1.9588 | 1.1157 |
| K00894 | ETNK, Ek | K00894                                    | 2.8526 | 2.2496 | 0.7023 |
|        |          | g_Debaryomyces.s__Debaryomyces_hansenii   | 2.8526 | 2.2496 | 0.7023 |
| K14674 | TGL4     | K14674                                    | 2.9154 | 1.9414 | 0.877  |
|        |          | g_Debaryomyces.s__Debaryomyces_hansenii   | 2.9154 | 1.9414 | 0.877  |
| K01115 | PLD1_2   | K01115                                    | 3.0928 | 1.5218 | 1.0213 |
|        |          | g_Debaryomyces.s__Debaryomyces_hansenii   | 3.0928 | 1.5218 | 1.0213 |
| K22831 | LOA1     | K22831                                    | 3.045  | 1.874  | 0.5325 |
|        |          | g_Debaryomyces.s__Debaryomyces_hansenii   | 3.045  | 1.874  | 0.5325 |
| K13519 | LPT1, AL | K13519                                    | 2.151  | 2.2984 | 0.915  |
|        |          | g_Debaryomyces.s__Debaryomyces_hansenii   | 2.151  | 2.2984 | 0.915  |
| K14676 | NTE, NRE | K14676                                    | 2.747  | 1.756  | 0.8307 |
|        |          | g_Debaryomyces.s__Debaryomyces_hansenii   | 2.747  | 1.756  | 0.8307 |
| K15728 | LPIN     | K15728                                    | 2.8006 | 1.6334 | 0.8477 |
|        |          | g_Debaryomyces.s__Debaryomyces_hansenii   | 2.8006 | 1.6334 | 0.8477 |
| K00551 | PEMT     | K00551                                    | 2.7444 | 1.8248 | 0.5378 |
|        |          | g_Debaryomyces.s__Debaryomyces_hansenii   | 2.6924 | 1.8248 | 0.5378 |
|        |          | g_Meyerozyma.s__Meyerozyma_guilliermondii | 0.052  | 0      | 0      |
| K08744 | CRLS     | K08744                                    | 2.0202 | 1.6038 | 0.9912 |
|        |          | g_Debaryomyces.s__Debaryomyces_hansenii   | 2.0202 | 1.6038 | 0.9912 |
| K00999 | CDIPT    | K00999                                    | 3.0666 | 0.9238 | 0.6427 |
|        |          | g_Debaryomyces.s__Debaryomyces_hansenii   | 3.0666 | 0.9238 | 0.6427 |
| K16368 | DGK1     | K16368                                    | 2.2004 | 1.4356 | 0.6538 |
|        |          | g_Debaryomyces.s__Debaryomyces_hansenii   | 2.2004 | 1.4356 | 0.6538 |
| K01094 | GEP4     | K01094                                    | 2.0614 | 1.774  | 0.4752 |
|        |          | g_Debaryomyces.s__Debaryomyces_hansenii   | 2.0614 | 1.774  | 0.4752 |
| K00901 | dgkA, DG | K00901                                    | 0.8528 | 2.321  | 0.2417 |
|        |          | g_Escherichia.s__Escherichia_coli         | 0.7016 | 1.5414 | 0.2417 |
|        |          | g_Klebsiella.s__Klebsiella_pneumoniae     | 0      | 0.7798 | 0      |
|        |          | K00901unclassified                        | 0.1512 | 0      | 0      |
| K01058 | pIdA     | K01058                                    | 0.9808 | 1.3938 | 0.0737 |
|        |          | g_Escherichia.s__Escherichia_coli         | 0.8988 | 0.8032 | 0.0737 |
|        |          | g_Klebsiella.s__Klebsiella_pneumoniae     | 0      | 0.5908 | 0      |
|        |          | g_Proteus.s__Proteus_mirabilis            | 0.082  | 0      | 0      |
| K01521 | cdh      | K01521                                    | 1.3738 | 0.8938 | 0.137  |
|        |          | g_Escherichia.s__Escherichia_coli         | 1.3738 | 0.6776 | 0.137  |
|        |          | g_Klebsiella.s__Klebsiella_pneumoniae     | 0      | 0.2162 | 0      |
| K00998 | pssA     | K00998                                    | 0.7186 | 1.2066 | 0      |
|        |          | g_Escherichia.s__Escherichia_coli         | 0.6696 | 0.5762 | 0      |
|        |          | g_Klebsiella.s__Klebsiella_pneumoniae     | 0      | 0.6016 | 0      |
|        |          | g_Proteus.s__Proteus_mirabilis            | 0.0492 | 0.0288 | 0      |
| K01048 | pIdB     | K01048                                    | 0.8812 | 0.9402 | 0.0658 |

|        |           |                                                |        |        |        |
|--------|-----------|------------------------------------------------|--------|--------|--------|
|        |           | g_Escherichia.s_Escherichia_coli               | 0.8812 | 0.8238 | 0.0658 |
|        |           | g_Proteus.s_Proteus_mirabilis                  | 0      | 0.1164 | 0      |
| K18697 | pgpC      | K18697                                         | 0.63   | 1.1942 | 0.0547 |
|        |           | g_Escherichia.s_Escherichia_coli               | 0.63   | 0.5262 | 0.0547 |
|        |           | g_Klebsiella.s_Klebsiella_pneumoniae           | 0      | 0.668  | 0      |
| K00105 | E1.1.3.21 | K00105                                         | 0      | 0.9242 | 0.734  |
|        |           | g_Aerococcus.s_Aerococcus_viridans             | 0      | 0.667  | 0.4737 |
|        |           | g_Enterococcus.s_Enterococcus_faecalis         | 0      | 0.2572 | 0.0158 |
|        |           | g_Lactococcus.s_Lactococcus_raffinolactis      | 0      | 0      | 0.036  |
|        |           | K00105unclassified                             | 0      | 0      | 0.2085 |
| K00112 | glpB      | K00112                                         | 0.9324 | 0.7926 | 0.024  |
|        |           | g_Escherichia.s_Escherichia_coli               | 0.9324 | 0.7638 | 0.024  |
|        |           | g_Klebsiella.s_Klebsiella_pneumoniae           | 0      | 0.0288 | 0      |
| K01096 | pgpB      | K01096                                         | 0.5174 | 0.7154 | 0.0988 |
|        |           | g_Escherichia.s_Escherichia_coli               | 0.5174 | 0.3136 | 0.0988 |
|        |           | g_Klebsiella.s_Klebsiella_pneumoniae           | 0      | 0.2888 | 0      |
|        |           | g_Proteus.s_Proteus_mirabilis                  | 0      | 0.1132 | 0      |
| K00113 | glpC      | K00113                                         | 0.7676 | 0.4816 | 0      |
|        |           | g_Escherichia.s_Escherichia_coli               | 0.7126 | 0.4816 | 0      |
|        |           | g_Proteus.s_Proteus_mirabilis                  | 0.0548 | 0      | 0      |
| K04019 | eutA      | K04019                                         | 0.6856 | 0.4276 | 0.0212 |
|        |           | g_Escherichia.s_Escherichia_coli               | 0.6856 | 0.4276 | 0.0212 |
| K05939 | aas       | K05939                                         | 0.6284 | 0.4284 | 0.0528 |
|        |           | g_Escherichia.s_Escherichia_coli               | 0.6284 | 0.4284 | 0.0528 |
| K06132 | clsC      | K06132                                         | 0.3916 | 0.2854 | 0.0232 |
|        |           | g_Escherichia.s_Escherichia_coli               | 0.3916 | 0.2854 | 0.0232 |
| K03736 | eutC      | K03736                                         | 0.152  | 0.4524 | 0.0348 |
|        |           | g_Enterococcus.s_Enterococcus_faecalis         | 0      | 0.14   | 0.0348 |
|        |           | g_Escherichia.s_Escherichia_coli               | 0.152  | 0.1306 | 0      |
|        |           | g_Klebsiella.s_Klebsiella_pneumoniae           | 0      | 0.1816 | 0      |
| K00096 | araM, egs | K00096                                         | 0      | 0.4934 | 0.1197 |
|        |           | g_Alistipes.s_Alistipes_shahii                 | 0      | 0.4934 | 0.1197 |
| K00631 | plsB      | K00631                                         | 0      | 0.2778 | 0      |
|        |           | g_Klebsiella.s_Klebsiella_pneumoniae           | 0      | 0.2778 | 0      |
| K13621 | BTA1      | K13621                                         | 0.014  | 0      | 0      |
|        |           | g_Meyerozyma.s_Meyerozyma_guilliermondii       | 0.014  | 0      | 0      |
| K14188 | dltC      | K14188                                         | 53.031 | 12.745 | 35.809 |
|        |           | g_Lactobacillus.s_Lactobacillus_delbrueckii    | 0      | 1.331  | 0.2828 |
|        |           | g_Lactobacillus.s_Lactobacillus_helveticus     | 0      | 0      | 0.2922 |
|        |           | g_Lactobacillus.s_Lactobacillus_johnsonii      | 37.906 | 3.127  | 24.022 |
|        |           | g_Lactobacillus.s_Lactobacillus_reuteri        | 10.207 | 1.0162 | 6.321  |
|        |           | g_Lactococcus.s_Lactococcus_lactis             | 0.4206 | 0.7304 | 0      |
|        |           | g_Staphylococcus.s_Staphylococcus_xylosum      | 1.564  | 2.0076 | 0.3328 |
|        |           | g_Streptococcus.s_Streptococcus_thermophilus   | 0.31   | 0.61   | 0.2922 |
|        |           | K14188unclassified                             | 2.6238 | 3.923  | 4.2653 |
| K01921 | ddl       | K01921                                         | 39.256 | 16.472 | 37.154 |
|        |           | g_Aerococcus.s_Aerococcus_viridans             | 0.0394 | 1.0786 | 0.5873 |
|        |           | g_Corynebacterium.s_Corynebacterium_glutamicum | 0.0822 | 1.3244 | 2.2092 |
|        |           | g_Enterococcus.s_Enterococcus_faecalis         | 0      | 0.098  | 0.0865 |
|        |           | g_Escherichia.s_Escherichia_coli               | 1.451  | 1.3016 | 0.2102 |
|        |           | g_Klebsiella.s_Klebsiella_pneumoniae           | 0      | 0.0586 | 0      |
|        |           | g_Lactobacillus.s_Lactobacillus_delbrueckii    | 0.1846 | 0.3526 | 0.063  |
|        |           | g_Lactobacillus.s_Lactobacillus_helveticus     | 0.1552 | 0.1766 | 0.1458 |
|        |           | g_Lactobacillus.s_Lactobacillus_johnsonii      | 26.745 | 4.9166 | 19.436 |
|        |           | g_Lactobacillus.s_Lactobacillus_reuteri        | 6.6286 | 1.3504 | 3.9418 |
|        |           | g_Lactococcus.s_Lactococcus_lactis             | 0.528  | 0.951  | 0.7572 |
|        |           | g_Leuconostoc.s_Leuconostoc_mesenteroides      | 0.241  | 0.2522 | 0.2887 |
|        |           | g_Proteus.s_Proteus_mirabilis                  | 0      | 0.0312 | 0      |

|            |                 |                                                 |        |        |        |
|------------|-----------------|-------------------------------------------------|--------|--------|--------|
| map00473_  |                 | g_Staphylococcus.s_Staphylococcus_xylosus       | 0.9038 | 0.7454 | 0.3925 |
| D-Alanine  |                 | g_Streptococcus.s_Streptococcus_thermophilus    | 0.5442 | 0.5436 | 0.5578 |
| metabolism |                 | K01921unclassified                              | 1.7534 | 3.2918 | 8.4768 |
|            | K01775 alr      | K01775                                          | 36.561 | 16.879 | 36.182 |
|            |                 | g_Aerococcus.s_Aerococcus_viridans              | 0      | 1.023  | 0.3475 |
|            |                 | g_Corynebacterium.s_Corynebacterium_glutamicum  | 0.2746 | 1.1114 | 2.0788 |
|            |                 | g_Escherichia.s_Escherichia_coli                | 1.107  | 0.7234 | 0.0908 |
|            |                 | g_Klebsiella.s_Klebsiella_pneumoniae            | 0      | 0.2484 | 0      |
|            |                 | g_Lactobacillus.s_Lactobacillus_delbrueckii     | 0.3858 | 0.4652 | 0.2903 |
|            |                 | g_Lactobacillus.s_Lactobacillus_helveticus      | 0.0608 | 0.066  | 0.062  |
|            |                 | g_Lactobacillus.s_Lactobacillus_johnsonii       | 24.35  | 4.5388 | 18.04  |
|            |                 | g_Lactobacillus.s_Lactobacillus_reuteri         | 8.2018 | 1.7258 | 4.6538 |
|            |                 | g_Lactococcus.s_Lactococcus_lactis              | 0.7384 | 0.812  | 0.5067 |
|            |                 | g_Proteus.s_Proteus_mirabilis                   | 0.0594 | 0.3248 | 0      |
|            |                 | g_Streptococcus.s_Streptococcus_thermophilus    | 0.3492 | 1.0196 | 0.6135 |
|            |                 | K01775unclassified                              | 1.0346 | 4.8202 | 9.4978 |
|            | K03367 dltA     | K03367                                          | 9.315  | 2.754  | 5.6628 |
|            |                 | g_Lactobacillus.s_Lactobacillus_delbrueckii     | 0.2808 | 0.559  | 0.137  |
|            |                 | g_Lactobacillus.s_Lactobacillus_helveticus      | 0.2118 | 0.177  | 0.061  |
|            |                 | g_Lactobacillus.s_Lactobacillus_reuteri         | 7.7388 | 1.189  | 4.7258 |
|            |                 | g_Lactococcus.s_Lactococcus_lactis              | 0.6882 | 0.491  | 0.4943 |
|            |                 | g_Staphylococcus.s_Staphylococcus_xylosus       | 0.3954 | 0.3384 | 0.2448 |
|            | K00824 dat      | K00824                                          | 0.4312 | 0.2696 | 0.169  |
|            |                 | g_Staphylococcus.s_Staphylococcus_xylosus       | 0.2304 | 0.2696 | 0.169  |
|            |                 | K00824unclassified                              | 0.2008 | 0      | 0      |
|            | K07024 SPP      | K07024                                          | 245.55 | 62.987 | 175.18 |
|            |                 | g_Bacteroides.s_Bacteroides_thetaiotaomicron    | 7.1126 | 7.6286 | 8.7385 |
|            |                 | g_Corynebacterium.s_Corynebacterium_glutamicum  | 0.2168 | 3.3532 | 5.1182 |
|            |                 | g_Enterococcus.s_Enterococcus_faecalis          | 0      | 0.1048 | 0.1208 |
|            |                 | g_Escherichia.s_Escherichia_coli                | 2.829  | 1.6788 | 0.0868 |
|            |                 | g_Klebsiella.s_Klebsiella_pneumoniae            | 0      | 0.42   | 0      |
|            |                 | g_Lactobacillus.s_Lactobacillus_delbrueckii     | 1.5832 | 1.0712 | 0.4928 |
|            |                 | g_Lactobacillus.s_Lactobacillus_helveticus      | 0.1976 | 0.288  | 0.0863 |
|            |                 | g_Lactobacillus.s_Lactobacillus_johnsonii       | 195.95 | 32.011 | 130.43 |
|            |                 | g_Lactobacillus.s_Lactobacillus_reuteri         | 27.151 | 3.7476 | 15.723 |
|            |                 | g_Lactococcus.s_Lactococcus_lactis              | 5.9084 | 8.5188 | 7.325  |
|            |                 | g_Leuconostoc.s_Leuconostoc_mesenteroides       | 0.7368 | 0.6066 | 0.19   |
|            |                 | g_Proteus.s_Proteus_mirabilis                   | 0      | 0.1876 | 0      |
|            |                 | g_Staphylococcus.s_Staphylococcus_xylosus       | 0.6948 | 0.3742 | 0.3682 |
|            |                 | K07024unclassified                              | 3.1744 | 2.9976 | 6.4937 |
|            | K01810 GPI, pgi | K01810                                          | 63.816 | 54.236 | 86.045 |
|            |                 | g_Alistipes.s_Alistipes_shahii                  | 0      | 0.6618 | 0.2498 |
|            |                 | g_Bacteroides.s_Bacteroides_thetaiotaomicron    | 7.5468 | 11.099 | 12.073 |
|            |                 | g_Bacteroides.s_Bacteroides_uniformis           | 0      | 5.4874 | 0      |
|            |                 | g_Corynebacterium.s_Corynebacterium_glutamicum  | 0.0242 | 1.2746 | 1.868  |
|            |                 | g_Deбaryomyces.s_Deбaryomyces_hansenii          | 3.253  | 2.2362 | 0.632  |
|            |                 | g_Enterococcus.s_Enterococcus_faecalis          | 0      | 0.0308 | 0.0222 |
|            |                 | g_Escherichia.s_Escherichia_coli                | 0.7812 | 0.595  | 0.0783 |
|            |                 | g_Lactobacillus.s_Lactobacillus_delbrueckii     | 0.1404 | 0.1488 | 0.1422 |
|            |                 | g_Lactobacillus.s_Lactobacillus_helveticus      | 0.0796 | 0      | 0.0252 |
|            |                 | g_Lactobacillus.s_Lactobacillus_johnsonii       | 21.924 | 3.9686 | 14.671 |
|            |                 | g_Lactobacillus.s_Lactobacillus_reuteri         | 7.2986 | 0.8022 | 4.671  |
|            |                 | g_Lactococcus.s_Lactococcus_lactis              | 0.7638 | 0.5616 | 0.8135 |
|            |                 | g_Leuconostoc.s_Leuconostoc_mesenteroides       | 0.1478 | 0.1178 | 0.3165 |
|            |                 | g_Meyerozyma.s_Meyerozyma_guilliermondii        | 0.0198 | 0      | 0      |
|            |                 | g_Parabacteroides.s_Parabacteroides_goldsteinii | 2.869  | 2.7772 | 6.0492 |
|            |                 | g_Proteus.s_Proteus_mirabilis                   | 0      | 0.0418 | 0      |
|            |                 | g_Staphylococcus.s_Staphylococcus_lentus        | 1.001  | 0.2066 | 0.939  |

|        |                   |                                                         |        |        |        |
|--------|-------------------|---------------------------------------------------------|--------|--------|--------|
|        |                   | <i>g_Staphylococcus.s_Staphylococcus_xylosus</i>        | 0.717  | 0.7224 | 0.3798 |
|        |                   | <i>g_Streptococcus.s_Streptococcus_thermophilus</i>     | 0.3926 | 0.2696 | 0.74   |
|        |                   | K01810unclassified                                      | 16.857 | 23.235 | 42.375 |
| K00845 | glk               | K00845                                                  | 59.62  | 48.079 | 62.107 |
|        |                   | <i>g_Aerococcus.s_Aerococcus_viridans</i>               | 0      | 0.8894 | 0.8808 |
|        |                   | <i>g_Alistipes.s_Alistipes_shahii</i>                   | 0      | 0.554  | 0.2103 |
|        |                   | <i>g_Bacteroides.s_Bacteroides_thetaiotaomicron</i>     | 15.202 | 20.472 | 23.535 |
|        |                   | <i>g_Bacteroides.s_Bacteroides_uniformis</i>            | 0      | 6.519  | 0      |
|        |                   | <i>g_Enterococcus.s_Enterococcus_faecalis</i>           | 0      | 0.0338 | 0      |
|        |                   | <i>g_Escherichia.s_Escherichia_coli</i>                 | 0.4974 | 0.4102 | 0.0325 |
|        |                   | <i>g_Klebsiella.s_Klebsiella_pneumoniae</i>             | 0      | 0.2464 | 0      |
|        |                   | <i>g_Lactobacillus.s_Lactobacillus_delbrueckii</i>      | 0.5394 | 0.3014 | 0.1493 |
|        |                   | <i>g_Lactobacillus.s_Lactobacillus_johnsonii</i>        | 29.805 | 6.1234 | 18.176 |
|        |                   | <i>g_Lactobacillus.s_Lactobacillus_reuteri</i>          | 5.794  | 1.4972 | 3.626  |
|        |                   | <i>g_Lactococcus.s_Lactococcus_lactis</i>               | 0.7542 | 0.3936 | 0.9335 |
|        |                   | <i>g_Lactococcus.s_Lactococcus_raffinolactis</i>        | 0      | 0      | 0.073  |
|        |                   | <i>g_Staphylococcus.s_Staphylococcus_xylosus</i>        | 0.1962 | 0.4384 | 0.0423 |
|        |                   | K00845unclassified                                      | 6.8318 | 10.201 | 14.448 |
| K01835 | pgm               | K01835                                                  | 42.661 | 45.206 | 52.53  |
|        |                   | <i>g_Aerococcus.s_Aerococcus_viridans</i>               | 0.0226 | 1.2674 | 0.8535 |
|        |                   | <i>g_Alistipes.s_Alistipes_shahii</i>                   | 0      | 0.5396 | 0.2572 |
|        |                   | <i>g_Bacteroides.s_Bacteroides_thetaiotaomicron</i>     | 6.4688 | 9.7104 | 9.8247 |
|        |                   | <i>g_Bacteroides.s_Bacteroides_uniformis</i>            | 0      | 4.455  | 0      |
|        |                   | <i>g_Bifidobacterium.s_Bifidobacterium_pseudolongum</i> | 0.1722 | 0.0666 | 1.1363 |
|        |                   | <i>g_Corynebacterium.s_Corynebacterium_glutamicum</i>   | 0.1462 | 1.3018 | 1.773  |
|        |                   | <i>g_Deбaryomyces.s_Deбaryomyces_hansenii</i>           | 5.6148 | 3.717  | 1.8298 |
|        |                   | <i>g_Enterococcus.s_Enterococcus_faecalis</i>           | 0.019  | 0      | 0.0168 |
|        |                   | <i>g_Escherichia.s_Escherichia_coli</i>                 | 0.3926 | 0.2796 | 0      |
|        |                   | <i>g_Klebsiella.s_Klebsiella_pneumoniae</i>             | 0      | 0.4152 | 0      |
|        |                   | <i>g_Lactobacillus.s_Lactobacillus_delbrueckii</i>      | 0.3086 | 0.4444 | 0.2442 |
|        |                   | <i>g_Lactobacillus.s_Lactobacillus_reuteri</i>          | 7.9652 | 1.576  | 4.6575 |
|        |                   | <i>g_Meyerozyma.s_Meyerozyma_guilliermondii</i>         | 0.0356 | 0      | 0      |
|        |                   | <i>g_Proteus.s_Proteus_mirabilis</i>                    | 0.0798 | 0.0866 | 0      |
|        |                   | <i>g_Staphylococcus.s_Staphylococcus_xylosus</i>        | 0.4054 | 0.072  | 0.1727 |
|        |                   | K01835unclassified                                      | 21.031 | 21.274 | 31.764 |
| K00975 | glgC              | K00975                                                  | 42.754 | 37.974 | 57.771 |
|        |                   | <i>g_Aerococcus.s_Aerococcus_viridans</i>               | 0.0676 | 0.6684 | 0.7265 |
|        |                   | <i>g_Corynebacterium.s_Corynebacterium_glutamicum</i>   | 0.1678 | 1.1488 | 2.2093 |
|        |                   | <i>g_Escherichia.s_Escherichia_coli</i>                 | 0.6796 | 0.4406 | 0.0232 |
|        |                   | <i>g_Klebsiella.s_Klebsiella_pneumoniae</i>             | 0      | 0.4318 | 0      |
|        |                   | <i>g_Lactobacillus.s_Lactobacillus_helveticus</i>       | 0.0816 | 0.0298 | 0.1268 |
|        |                   | <i>g_Lactococcus.s_Lactococcus_lactis</i>               | 1.5684 | 1.3722 | 1.1092 |
|        |                   | K00975unclassified                                      | 40.188 | 33.882 | 53.576 |
| K01223 | E3.2.1.86IK01223  | K01223                                                  | 57.945 | 23.996 | 50.551 |
|        |                   | <i>g_Corynebacterium.s_Corynebacterium_glutamicum</i>   | 0.093  | 1.2366 | 1.7353 |
|        |                   | <i>g_Enterococcus.s_Enterococcus_faecalis</i>           | 0.0226 | 0.3232 | 0.101  |
|        |                   | <i>g_Escherichia.s_Escherichia_coli</i>                 | 2.2252 | 2.1374 | 0.2917 |
|        |                   | <i>g_Klebsiella.s_Klebsiella_pneumoniae</i>             | 0      | 0.8758 | 0      |
|        |                   | <i>g_Lactobacillus.s_Lactobacillus_delbrueckii</i>      | 0.2138 | 0.1334 | 0.0247 |
|        |                   | <i>g_Lactobacillus.s_Lactobacillus_helveticus</i>       | 0.3086 | 0.2046 | 0.0643 |
|        |                   | <i>g_Lactobacillus.s_Lactobacillus_johnsonii</i>        | 43.483 | 8.041  | 36.255 |
|        |                   | <i>g_Lactococcus.s_Lactococcus_lactis</i>               | 3.5512 | 4.3946 | 3.5988 |
|        |                   | <i>g_Lactococcus.s_Lactococcus_raffinolactis</i>        | 0      | 0      | 0.0233 |
|        |                   | <i>g_Leuconostoc.s_Leuconostoc_mesenteroides</i>        | 0      | 0      | 0.1423 |
|        |                   | K01223unclassified                                      | 8.0472 | 6.649  | 8.3145 |
| K00847 | E2.7.1.4, sK00847 | K00847                                                  | 47.98  | 24.682 | 45.554 |
|        |                   | <i>g_Aerococcus.s_Aerococcus_viridans</i>               | 0      | 0.4564 | 1.322  |
|        |                   | <i>g_Alistipes.s_Alistipes_shahii</i>                   | 0      | 0.574  | 0.107  |

|        |                 |                                                |        |        |        |
|--------|-----------------|------------------------------------------------|--------|--------|--------|
|        |                 | g_Bacteroides.s_Bacteroides_thetaiotaomicron   | 7.1248 | 9.8452 | 8.024  |
|        |                 | g_Enterococcus.s_Enterococcus_faecalis         | 0.0818 | 0      | 0      |
|        |                 | g_Escherichia.s_Escherichia_coli               | 0.1978 | 0.1086 | 0      |
|        |                 | g_Klebsiella.s_Klebsiella_pneumoniae           | 0      | 1.0366 | 0      |
|        |                 | g_Lactobacillus.s_Lactobacillus_helveticus     | 0.0592 | 0.0924 | 0.0498 |
|        |                 | g_Lactobacillus.s_Lactobacillus_johnsonii      | 29.705 | 4.6992 | 21.923 |
|        |                 | g_Lactobacillus.s_Lactobacillus_reuteri        | 5.2674 | 0.81   | 3.5913 |
|        |                 | g_Lactococcus.s_Lactococcus_lactis             | 0.6066 | 0.443  | 0.4747 |
|        |                 | K00847unclassified                             | 4.9366 | 6.6158 | 10.062 |
| K01187 | malZ            | K01187                                         | 39.611 | 24.659 | 39.706 |
|        |                 | g_Alistipes.s_Alistipes_finegoldii             | 0      | 0.0594 | 0      |
|        |                 | g_Alistipes.s_Alistipes_shahii                 | 0      | 0.7892 | 0.1747 |
|        |                 | g_Bacteroides.s_Bacteroides_thetaiotaomicron   | 6.704  | 9.8148 | 10.925 |
|        |                 | g_Enterococcus.s_Enterococcus_faecalis         | 0.061  | 0.019  | 0.0182 |
|        |                 | g_Escherichia.s_Escherichia_coli               | 0.3728 | 0.2966 | 0.0725 |
|        |                 | g_Lactobacillus.s_Lactobacillus_delbrueckii    | 0      | 0.1554 | 0      |
|        |                 | g_Lactobacillus.s_Lactobacillus_helveticus     | 0.0758 | 0.0832 | 0      |
|        |                 | g_Lactobacillus.s_Lactobacillus_johnsonii      | 24.931 | 3.5944 | 16.033 |
|        |                 | g_Lactococcus.s_Lactococcus_lactis             | 0.5992 | 0.8882 | 0.4815 |
|        |                 | g_Meyerozyma.s_Meyerozyma_guilliermondii       | 0.0186 | 0      | 0      |
|        |                 | g_Staphylococcus.s_Staphylococcus_xylosus      | 0.2818 | 0.2476 | 0.1427 |
|        |                 | K01187unclassified                             | 6.5674 | 8.7104 | 11.858 |
| K02761 | PTS-Cel-EK02761 |                                                | 55.27  | 15.361 | 29.063 |
|        |                 | g_Enterococcus.s_Enterococcus_faecalis         | 0      | 0.4672 | 0.089  |
|        |                 | g_Escherichia.s_Escherichia_coli               | 0.4312 | 0.466  | 0.068  |
|        |                 | g_Klebsiella.s_Klebsiella_pneumoniae           | 0      | 1.9118 | 0      |
|        |                 | g_Lactobacillus.s_Lactobacillus_delbrueckii    | 0.632  | 1.0996 | 0.202  |
|        |                 | g_Lactobacillus.s_Lactobacillus_helveticus     | 0.1714 | 0.3296 | 0.0727 |
|        |                 | g_Lactobacillus.s_Lactobacillus_johnsonii      | 41.495 | 6.212  | 18.649 |
|        |                 | g_Lactobacillus.s_Lactobacillus_reuteri        | 9.5702 | 1.2558 | 4.867  |
|        |                 | g_Lactococcus.s_Lactococcus_lactis             | 2.038  | 2.4566 | 2.2125 |
|        |                 | g_Lactococcus.s_Lactococcus_raffinolactis      | 0.1026 | 0.2738 | 0.091  |
|        |                 | g_Leuconostoc.s_Leuconostoc_mesenteroides      | 0      | 0.029  | 0      |
|        |                 | g_Streptococcus.s_Streptococcus_thermophilus   | 0.412  | 0.8596 | 0.4682 |
|        |                 | K02761unclassified                             | 0.4182 | 0      | 2.3433 |
| K01176 | AMY, am         | K01176                                         | 16.123 | 27.119 | 29.746 |
|        |                 | g_Aerococcus.s_Aerococcus_viridans             | 0.0246 | 0.87   | 1.5868 |
|        |                 | g_Alistipes.s_Alistipes_finegoldii             | 0      | 0.2334 | 0.1102 |
|        |                 | g_Alistipes.s_Alistipes_shahii                 | 0      | 0.231  | 0.1225 |
|        |                 | g_Bacteroides.s_Bacteroides_thetaiotaomicron   | 13.144 | 22.755 | 25.327 |
|        |                 | g_Escherichia.s_Escherichia_coli               | 1.3512 | 0.9794 | 0      |
|        |                 | g_Klebsiella.s_Klebsiella_pneumoniae           | 0      | 0.3982 | 0      |
|        |                 | g_Lactococcus.s_Lactococcus_lactis             | 0.941  | 0.6554 | 1.4795 |
|        |                 | K01176unclassified                             | 0.6618 | 0.9958 | 1.1203 |
| K00688 | PYG, glg        | K00688                                         | 21.101 | 22.538 | 25.563 |
|        |                 | g_Aerococcus.s_Aerococcus_viridans             | 0      | 0.7646 | 1.3062 |
|        |                 | g_Klebsiella.s_Klebsiella_pneumoniae           | 0      | 0.4118 | 0      |
|        |                 | g_Lactococcus.s_Lactococcus_raffinolactis      | 0.0182 | 0      | 0.0127 |
|        |                 | K00688unclassified                             | 21.083 | 21.361 | 24.244 |
| K00963 | UGP2, gal       | K00963                                         | 19.395 | 18.531 | 25.396 |
|        |                 | g_Aerococcus.s_Aerococcus_viridans             | 0      | 0.3502 | 0.5685 |
|        |                 | g_Corynebacterium.s_Corynebacterium_glutamicum | 0      | 1.1496 | 2.3145 |
|        |                 | g_Deбaryomyces.s_Deбaryomyces_hansenii         | 3.214  | 2.1506 | 0.9083 |
|        |                 | g_Enterorhabdus.s_Enterorhabdus_caecimuris     | 1.226  | 2.3838 | 2.052  |
|        |                 | g_Escherichia.s_Escherichia_coli               | 0.4598 | 0.2868 | 0.07   |
|        |                 | g_Lactobacillus.s_Lactobacillus_delbrueckii    | 0.2996 | 0.4516 | 0.1802 |
|        |                 | g_Lactobacillus.s_Lactobacillus_helveticus     | 0.2954 | 0.3322 | 0      |
|        |                 | g_Lactobacillus.s_Lactobacillus_murinus        | 2.9982 | 2.9178 | 0.6737 |

|            |                    |                                                |        |        |        |
|------------|--------------------|------------------------------------------------|--------|--------|--------|
|            |                    | g_Lactobacillus.s_Lactobacillus_reuteri        | 9.3656 | 0.9732 | 5.0935 |
|            |                    | g_Lactococcus.s_Lactococcus_lactis             | 0.449  | 0.4236 | 0.3322 |
|            |                    | K00963unclassified                             | 1.0878 | 7.1124 | 13.204 |
| K02759     | PTS-Cel-EK02759    |                                                | 31.753 | 7.4898 | 23.151 |
|            |                    | g_Enterococcus.s_Enterococcus_faecalis         | 0      | 0.1918 | 0      |
|            |                    | g_Escherichia.s_Escherichia_coli               | 1.1328 | 0.697  | 0      |
|            |                    | g_Klebsiella.s_Klebsiella_pneumoniae           | 0      | 1.7028 | 0      |
|            |                    | g_Lactobacillus.s_Lactobacillus_johnsonii      | 29.856 | 3.98   | 20.064 |
|            |                    | g_Lactococcus.s_Lactococcus_lactis             | 0.7642 | 0.9184 | 1.524  |
|            |                    | K02759unclassified                             | 0      | 0      | 1.5632 |
| K00700     | GBE1, glgK00700    |                                                | 18.415 | 15.723 | 26.791 |
|            |                    | g_Debaryomyces.s_Debaryomyces_hansenii         | 3.1444 | 1.437  | 0.8888 |
|            |                    | g_Klebsiella.s_Klebsiella_pneumoniae           | 0      | 0.2646 | 0      |
|            |                    | g_Lactobacillus.s_Lactobacillus_helveticus     | 0.016  | 0.0178 | 0      |
|            |                    | g_Lactococcus.s_Lactococcus_lactis             | 0.77   | 0.663  | 0.7522 |
|            |                    | K00700unclassified                             | 14.485 | 13.341 | 25.15  |
| K00703     | glgA K00703        |                                                | 16.581 | 16.896 | 25.572 |
|            |                    | g_Aerococcus.s_Aerococcus_viridans             | 0      | 0.5596 | 0.5852 |
|            |                    | g_Alistipes.s_Alistipes_shahii                 | 0      | 0.543  | 0.3187 |
|            |                    | g_Blautia.s_Ruminococcus_torques               | 0.0202 | 0      | 0      |
|            |                    | g_Escherichia.s_Escherichia_coli               | 0.956  | 0.9152 | 0.0207 |
|            |                    | g_Klebsiella.s_Klebsiella_pneumoniae           | 0      | 0.2798 | 0      |
|            |                    | g_Lactobacillus.s_Lactobacillus_helveticus     | 0.053  | 0      | 0      |
|            |                    | g_Lactococcus.s_Lactococcus_lactis             | 0.7024 | 0.893  | 0.611  |
|            |                    | K00703unclassified                             | 14.849 | 13.705 | 24.036 |
| K05349     | bgIX K05349        |                                                | 16.222 | 19.616 | 22.407 |
|            |                    | g_Alistipes.s_Alistipes_finegoldii             | 0      | 0.209  | 0      |
|            |                    | g_Alistipes.s_Alistipes_shahii                 | 0      | 0.8862 | 0.4578 |
|            |                    | g_Escherichia.s_Escherichia_coli               | 1.1766 | 0.1876 | 0      |
|            |                    | g_Klebsiella.s_Klebsiella_pneumoniae           | 0      | 0.2882 | 0      |
|            |                    | g_Lactococcus.s_Lactococcus_lactis             | 0.073  | 0.066  | 0.0598 |
|            |                    | g_Meyerozyma.s_Meyerozyma_guilliermondii       | 0.0694 | 0      | 0      |
|            |                    | K05349unclassified                             | 14.903 | 17.98  | 21.889 |
| map00500_  | K01838 pgmB K01838 |                                                | 27.69  | 6.017  | 19.348 |
| Starch and |                    | g_Alistipes.s_Alistipes_shahii                 | 0      | 0.216  | 0.3887 |
| sucrose    |                    | g_Enterococcus.s_Enterococcus_faecalis         | 0.1188 | 0      | 0.053  |
| metabolism |                    | g_Escherichia.s_Escherichia_coli               | 0.8424 | 0.203  | 0      |
|            |                    | g_Lactobacillus.s_Lactobacillus_delbrueckii    | 0      | 0.0716 | 0      |
|            |                    | g_Lactobacillus.s_Lactobacillus_johnsonii      | 26.234 | 5.2132 | 18.27  |
|            |                    | g_Lactococcus.s_Lactococcus_lactis             | 0.3806 | 0.1898 | 0.3997 |
|            |                    | g_Leuconostoc.s_Leuconostoc_mesenteroides      | 0.114  | 0.1236 | 0.2375 |
| K01208     | cd, ma, np K01208  |                                                | 26.197 | 6.205  | 20.028 |
|            |                    | g_Corynebacterium.s_Corynebacterium_glutamicum | 0.1406 | 1.3686 | 2.0522 |
|            |                    | g_Enterococcus.s_Enterococcus_faecalis         | 0      | 0.0686 | 0.0657 |
|            |                    | g_Lactobacillus.s_Lactobacillus_johnsonii      | 25.537 | 4.2282 | 17.394 |
|            |                    | g_Lactococcus.s_Lactococcus_lactis             | 0.5202 | 0.5396 | 0.516  |
| K02760     | PTS-Cel-EK02760    |                                                | 28.363 | 6.943  | 15.96  |
|            |                    | g_Escherichia.s_Escherichia_coli               | 0      | 0.1732 | 0      |
|            |                    | g_Klebsiella.s_Klebsiella_pneumoniae           | 0      | 2.1464 | 0      |
|            |                    | g_Lactobacillus.s_Lactobacillus_johnsonii      | 26.52  | 3.4746 | 14.475 |
|            |                    | g_Lactococcus.s_Lactococcus_lactis             | 1.6748 | 0.8532 | 0.171  |
|            |                    | g_Lactococcus.s_Lactococcus_raffinolactis      | 0      | 0.296  | 0.258  |
|            |                    | g_Leuconostoc.s_Leuconostoc_mesenteroides      | 0      | 0      | 0.194  |
|            |                    | g_Proteus.s_Proteus_mirabilis                  | 0.1676 | 0      | 0      |
|            |                    | K02760unclassified                             | 0      | 0      | 0.8618 |
| K02810     | PTS-Scr-EK02810    |                                                | 15.928 | 5.8756 | 26.946 |
|            |                    | g_Enterococcus.s_Enterococcus_faecalis         | 0      | 0.0156 | 0.0147 |
|            |                    | g_Escherichia.s_Escherichia_coli               | 0      | 0.2962 | 0      |

|        |                 |                                                |        |        |        |
|--------|-----------------|------------------------------------------------|--------|--------|--------|
|        |                 | g_Klebsiella.s_Klebsiella_pneumoniae           | 0      | 0.6578 | 0      |
|        |                 | g_Lactobacillus.s_Lactobacillus_helveticus     | 0.0788 | 0      | 0      |
|        |                 | g_Lactobacillus.s_Lactobacillus_johnsonii      | 13.799 | 2.9594 | 21.033 |
|        |                 | g_Lactococcus.s_Lactococcus_lactis             | 0.554  | 0.6178 | 0.441  |
|        |                 | g_Proteus.s_Proteus_mirabilis                  | 0      | 0.0574 | 0      |
|        |                 | g_Staphylococcus.s_Staphylococcus_xylosus      | 1.0178 | 0.6238 | 0.7283 |
|        |                 | g_Streptococcus.s_Streptococcus_thermophilus   | 0.4776 | 0.4468 | 0.4438 |
|        |                 | K02810unclassified                             | 0      | 0.201  | 4.2857 |
| K01193 | INV, sacAK01193 |                                                | 13.745 | 14.588 | 17.423 |
|        |                 | g_Aerococcus.s_Aerococcus_viridans             | 0.027  | 0.7196 | 0.7047 |
|        |                 | g_Bacteroides.s_Bacteroides_thetaiotaomicron   | 6.1138 | 8.2352 | 8.238  |
|        |                 | g_Corynebacterium.s_Corynebacterium_glutamicum | 0.0852 | 0.7514 | 1.868  |
|        |                 | g_Debaryomyces.s_Debaryomyces_hansenii         | 0.4486 | 0.4294 | 0.1975 |
|        |                 | g_Enterococcus.s_Enterococcus_faecalis         | 0      | 0.1108 | 0.02   |
|        |                 | g_Escherichia.s_Escherichia_coli               | 0.7864 | 0.7726 | 0      |
|        |                 | g_Klebsiella.s_Klebsiella_pneumoniae           | 0      | 0.5106 | 0      |
|        |                 | g_Lactobacillus.s_Lactobacillus_delbrueckii    | 0.0502 | 0.0918 | 0      |
|        |                 | g_Lactobacillus.s_Lactobacillus_helveticus     | 0.0592 | 0.1344 | 0.0193 |
|        |                 | g_Lactococcus.s_Lactococcus_lactis             | 0.0222 | 0.1512 | 0.1625 |
|        |                 | g_Leuconostoc.s_Leuconostoc_mesenteroides      | 0.1008 | 0.1532 | 0.1358 |
|        |                 | g_Proteus.s_Proteus_mirabilis                  | 0.0906 | 0.0678 | 0      |
|        |                 | g_Staphylococcus.s_Staphylococcus_xylosus      | 0.5534 | 0.1698 | 0.2255 |
|        |                 | K01193unclassified                             | 5.4074 | 2.2892 | 5.8517 |
| K00844 | HK              | K00844                                         | 14.981 | 16.244 | 12.087 |
|        |                 | g_Bacteroides.s_Bacteroides_thetaiotaomicron   | 6.6494 | 9.8578 | 9.5063 |
|        |                 | g_Debaryomyces.s_Debaryomyces_hansenii         | 8.331  | 6.3866 | 2.58   |
| K01214 | ISA, treX       | K01214                                         | 13.276 | 15.566 | 8.1825 |
|        |                 | K01214unclassified                             | 13.276 | 15.566 | 8.1825 |
| K00690 | E2.4.1.7        | K00690                                         | 20.909 | 3.783  | 4.3398 |
|        |                 | g_Lactobacillus.s_Lactobacillus_delbrueckii    | 0.128  | 0.5076 | 0.1153 |
|        |                 | g_Lactobacillus.s_Lactobacillus_johnsonii      | 13.094 | 1.607  | 0      |
|        |                 | g_Lactobacillus.s_Lactobacillus_reuteri        | 7.4422 | 1.1026 | 3.6953 |
|        |                 | g_Lactococcus.s_Lactococcus_lactis             | 0      | 0.186  | 0.2158 |
|        |                 | g_Leuconostoc.s_Leuconostoc_lactis             | 0.0456 | 0.0682 | 0.064  |
|        |                 | g_Leuconostoc.s_Leuconostoc_mesenteroides      | 0.1992 | 0.311  | 0.2495 |
| K01210 | E3.2.1.58       | K01210                                         | 11.516 | 8.372  | 3.7188 |
|        |                 | g_Debaryomyces.s_Debaryomyces_hansenii         | 11.516 | 8.372  | 3.7188 |
| K01182 | IMA, mall       | K01182                                         | 11.901 | 3.1816 | 5.1797 |
|        |                 | g_Debaryomyces.s_Debaryomyces_hansenii         | 2.4914 | 1.6984 | 0.8813 |
|        |                 | g_Lactobacillus.s_Lactobacillus_reuteri        | 9.2698 | 1.4044 | 4.2787 |
|        |                 | g_Leuconostoc.s_Leuconostoc_mesenteroides      | 0.1402 | 0.0792 | 0.02   |
| K21574 | susB            | K21574                                         | 3.815  | 6.7806 | 8.3252 |
|        |                 | g_Alistipes.s_Alistipes_finegoldii             | 0      | 0.2926 | 0.0147 |
|        |                 | K21574unclassified                             | 3.815  | 6.4882 | 8.3105 |
| K00697 | otsA            | K00697                                         | 3.7358 | 4.17   | 9.3768 |
|        |                 | g_Debaryomyces.s_Debaryomyces_hansenii         | 3.271  | 2.2794 | 0.9578 |
|        |                 | g_Escherichia.s_Escherichia_coli               | 0.4646 | 0.5378 | 0      |
|        |                 | g_Klebsiella.s_Klebsiella_pneumoniae           | 0      | 0.1884 | 0      |
|        |                 | K00697unclassified                             | 0      | 1.1646 | 8.4188 |
| K00705 | malQ            | K00705                                         | 2.382  | 4.3486 | 9.8012 |
|        |                 | g_Aerococcus.s_Aerococcus_viridans             | 0.025  | 1.0422 | 2.0245 |
|        |                 | g_Alistipes.s_Alistipes_finegoldii             | 0      | 0.085  | 0.0488 |
|        |                 | g_Corynebacterium.s_Corynebacterium_glutamicum | 0.147  | 1.4624 | 2.2767 |
|        |                 | g_Escherichia.s_Escherichia_coli               | 0.1534 | 0.069  | 0      |
|        |                 | g_Lactococcus.s_Lactococcus_lactis             | 0.5714 | 0.6192 | 0.426  |
|        |                 | K00705unclassified                             | 1.485  | 1.0708 | 5.0252 |
| K00978 | rfbF            | K00978                                         | 2.365  | 3.334  | 9.832  |
|        |                 | K00978unclassified                             | 2.365  | 3.334  | 9.832  |



|        |                  |                                                |        |        |        |
|--------|------------------|------------------------------------------------|--------|--------|--------|
| K01232 | glvA             | K01232                                         | 2.0286 | 2.7466 | 6.0313 |
|        |                  | g_Aerococcus.s_Aerococcus_viridans             | 0      | 0      | 0.0222 |
|        |                  | g_Escherichia.s_Escherichia_coli               | 0.688  | 0.648  | 0.1155 |
|        |                  | g_Klebsiella.s_Klebsiella_pneumoniae           | 0      | 0.4042 | 0      |
|        |                  | g_Lactobacillus.s_Lactobacillus_delbrueckii    | 0.2298 | 0.298  | 0.0673 |
|        |                  | K01232unclassified                             | 1.1108 | 1.3966 | 5.8265 |
| K02819 | PTS-Tre-EK02819  | K02819                                         | 3.4224 | 3.548  | 2.754  |
|        |                  | g_Escherichia.s_Escherichia_coli               | 0.9036 | 1.3136 | 0.0865 |
|        |                  | g_Klebsiella.s_Klebsiella_pneumoniae           | 0      | 0.3632 | 0      |
|        |                  | g_Proteus.s_Proteus_mirabilis                  | 0.0234 | 0.0218 | 0      |
|        |                  | g_Staphylococcus.s_Staphylococcus_xylosus      | 0.6844 | 0.576  | 0.3537 |
|        |                  | K02819unclassified                             | 1.8106 | 1.2734 | 2.3137 |
| K05343 | treS             | K05343                                         | 0      | 0.6304 | 7.0582 |
|        |                  | g_Escherichia.s_Escherichia_coli               | 0      | 0.2268 | 0.018  |
|        |                  | g_Klebsiella.s_Klebsiella_pneumoniae           | 0      | 0.1184 | 0      |
|        |                  | K05343unclassified                             | 0      | 0.2856 | 7.0402 |
| K16147 | glgE             | K16147                                         | 0.2126 | 1.6636 | 5.5505 |
|        |                  | g_Corynebacterium.s_Corynebacterium_glutamicum | 0.2126 | 1.4076 | 1.9112 |
|        |                  | K16147unclassified                             | 0      | 0.2558 | 3.6392 |
| K16148 | glgM             | K16148                                         | 0.1934 | 0.9744 | 5.91   |
|        |                  | K16148unclassified                             | 0.1934 | 0.9744 | 5.91   |
| K01179 | E3.2.1.4         | K01179                                         | 0.2278 | 6.454  | 0.782  |
|        |                  | g_Alistipes.s_Alistipes_finegoldii             | 0      | 0.0876 | 0      |
|        |                  | g_Alistipes.s_Alistipes_shahii                 | 0      | 0.12   | 0      |
|        |                  | g_Bacteroides.s_Bacteroides_uniformis          | 0      | 4.2448 | 0      |
|        |                  | K01179unclassified                             | 0.2278 | 2.0014 | 0.782  |
| K01200 | pulA             | K01200                                         | 0.7958 | 3.2074 | 2.3443 |
|        |                  | g_Aerococcus.s_Aerococcus_viridans             | 0      | 1.18   | 0.5962 |
|        |                  | g_Enterococcus.s_Enterococcus_faecalis         | 0      | 0.0198 | 0      |
|        |                  | g_Klebsiella.s_Klebsiella_pneumoniae           | 0      | 0.2942 | 0      |
|        |                  | g_Lactococcus.s_Lactococcus_lactis             | 0.191  | 0.3782 | 0.2238 |
|        |                  | K01200unclassified                             | 0.6048 | 1.3354 | 1.5243 |
| K01226 | treC             | K01226                                         | 1.3404 | 2.766  | 1.9843 |
|        |                  | g_Aerococcus.s_Aerococcus_viridans             | 0      | 1.2588 | 1.433  |
|        |                  | g_Enterococcus.s_Enterococcus_faecalis         | 0      | 0.023  | 0      |
|        |                  | g_Escherichia.s_Escherichia_coli               | 1.0674 | 0.8    | 0.0775 |
|        |                  | g_Lactobacillus.s_Lactobacillus_delbrueckii    | 0.0474 | 0      | 0      |
|        |                  | g_Lactobacillus.s_Lactobacillus_helveticus     | 0.0502 | 0.0632 | 0      |
|        |                  | g_Lactococcus.s_Lactococcus_raffinolactis      | 0.0718 | 0.021  | 0.1383 |
|        |                  | g_Streptococcus.s_Streptococcus_thermophilus   | 0.1034 | 0.6    | 0.3355 |
| K00750 | GYG1, G`K00750   | K00750                                         | 3.1078 | 2.1748 | 0.7948 |
|        |                  | g_Debaryomyces.s_Debaryomyces_hansenii         | 3.0786 | 2.1748 | 0.7948 |
|        |                  | g_Meyerozyma.s_Meyerozyma_guilliermondii       | 0.0292 | 0      | 0      |
| K22337 | TSL1, TP;K22337  | K22337                                         | 2.625  | 2.2206 | 1.1315 |
|        |                  | g_Debaryomyces.s_Debaryomyces_hansenii         | 2.625  | 2.2206 | 1.1315 |
|        |                  | K22337                                         | 2.6618 | 1.5984 | 0.7108 |
|        |                  | g_Debaryomyces.s_Debaryomyces_hansenii         | 2.6364 | 1.5984 | 0.7108 |
|        |                  | g_Meyerozyma.s_Meyerozyma_guilliermondii       | 0.0254 | 0      | 0      |
| K01178 | SGA1             | K01178                                         | 2.5376 | 2.1346 | 0.9135 |
|        |                  | g_Debaryomyces.s_Debaryomyces_hansenii         | 2.5376 | 2.1346 | 0.9135 |
| K01087 | otsB             | K01087                                         | 0.4954 | 2.1422 | 2.5307 |
|        |                  | g_Corynebacterium.s_Corynebacterium_glutamicum | 0.1802 | 1.3776 | 2.4358 |
|        |                  | g_Escherichia.s_Escherichia_coli               | 0.3152 | 0.5558 | 0.0948 |
|        |                  | g_Klebsiella.s_Klebsiella_pneumoniae           | 0      | 0.2086 | 0      |
| K01222 | E3.2.1.86;K01222 | K01222                                         | 0.5118 | 2.964  | 1.1765 |
|        |                  | g_Aerococcus.s_Aerococcus_viridans             | 0      | 0.5556 | 0.8328 |
|        |                  | g_Escherichia.s_Escherichia_coli               | 0.5118 | 0.3456 | 0.047  |
|        |                  | g_Klebsiella.s_Klebsiella_pneumoniae           | 0      | 1.725  | 0      |

|        |            |                                                  |        |        |        |
|--------|------------|--------------------------------------------------|--------|--------|--------|
|        |            | K01222unclassified                               | 0      | 0.3376 | 0.2967 |
| K01236 | treZ, glgZ | K01236                                           | 0.0938 | 1.3026 | 1.9333 |
|        |            | g_Corynebacterium.s_Corynebacterium_glutamicum   | 0.0938 | 1.3026 | 1.9333 |
| K06896 | mapP       | K06896                                           | 0      | 1.086  | 1.82   |
|        |            | g_Aerococcus.s_Aerococcus_viridans               | 0      | 0.8124 | 1.82   |
|        |            | g_Enterococcus.s_Enterococcus_faecalis           | 0      | 0.2736 | 0      |
| K02777 | PTS-Glc-IK | K02777                                           | 1.1544 | 1.135  | 0.7515 |
|        |            | g_Enterococcus.s_Enterococcus_faecalis           | 0      | 0.107  | 0      |
|        |            | g_Escherichia.s_Escherichia_coli                 | 0      | 0.3902 | 0.1473 |
|        |            | g_Klebsiella.s_Klebsiella_pneumoniae             | 0      | 0.1794 | 0      |
|        |            | g_Lactobacillus.s_Lactobacillus_delbrueckii      | 0.3666 | 0.1904 | 0.1717 |
|        |            | g_Staphylococcus.s_Staphylococcus_xylosum        | 0.698  | 0.2684 | 0.4325 |
|        |            | K02777unclassified                               | 0.0898 | 0      | 0      |
| K01194 | TREH, tre  | K01194                                           | 1.5494 | 1.5526 | 0.0355 |
|        |            | g_Escherichia.s_Escherichia_coli                 | 1.5494 | 1.0866 | 0.0355 |
|        |            | g_Klebsiella.s_Klebsiella_pneumoniae             | 0      | 0.4664 | 0      |
| K02750 | PTS-Glv-IK | K02750                                           | 1.1638 | 1.4206 | 0.3275 |
|        |            | g_Enterococcus.s_Enterococcus_faecalis           | 0      | 0      | 0.0183 |
|        |            | g_Klebsiella.s_Klebsiella_pneumoniae             | 0      | 0.8046 | 0      |
|        |            | g_Staphylococcus.s_Staphylococcus_xylosum        | 1.1638 | 0.616  | 0.3092 |
| K05350 | bgIB       | K05350                                           | 0.1732 | 0.1468 | 1.4308 |
|        |            | g_Bifidobacterium.s_Bifidobacterium_pseudolongum | 0.1198 | 0.0806 | 1.4308 |
|        |            | g_Lactococcus.s_Lactococcus_lactis               | 0.0534 | 0.066  | 0      |
| K02791 | PTS-MalC   | K02791                                           | 0.7214 | 1.2302 | 0.0375 |
|        |            | g_Enterococcus.s_Enterococcus_faecalis           | 0.042  | 0.126  | 0.0375 |
|        |            | g_Escherichia.s_Escherichia_coli                 | 0.6164 | 0.5428 | 0      |
|        |            | g_Klebsiella.s_Klebsiella_pneumoniae             | 0      | 0.4972 | 0      |
|        |            | g_Proteus.s_Proteus_mirabilis                    | 0.063  | 0.0642 | 0      |
| K02438 | glgX       | K02438                                           | 0.8418 | 0.4108 | 0.0775 |
|        |            | g_Escherichia.s_Escherichia_coli                 | 0.8418 | 0.4108 | 0.0775 |
| K00702 | E2.4.1.20  | K00702                                           | 0      | 0.698  | 0.4837 |
|        |            | K00702unclassified                               | 0      | 0.698  | 0.4837 |
| K07405 | E3.2.1.1A  | K07405                                           | 0      | 0.518  | 0.3293 |
|        |            | g_Alistipes.s_Alistipes_shahii                   | 0      | 0.518  | 0.212  |
|        |            | K07405unclassified                               | 0      | 0      | 0.1173 |
| K00693 | GYS        | K00693                                           | 0      | 0      | 0.5423 |
|        |            | K00693unclassified                               | 0      | 0      | 0.5423 |
| K00706 | E2.4.1.34  | K00706                                           | 0      | 0.1664 | 0.2178 |
|        |            | K00706unclassified                               | 0      | 0.1664 | 0.2178 |
| K02808 | PTS-Scr-EK | K02808                                           | 0      | 0.302  | 0      |
|        |            | g_Lactobacillus.s_Lactobacillus_delbrueckii      | 0      | 0.302  | 0      |
| K00691 | mapA       | K00691                                           | 0.0556 | 0.1016 | 0      |
|        |            | g_Enterococcus.s_Enterococcus_faecalis           | 0.0556 | 0.1016 | 0      |
| K16055 | TPS        | K16055                                           | 0.013  | 0      | 0      |
|        |            | g_Meyerozyma.s_Meyerozyma_guilliermondii         | 0.013  | 0      | 0      |
| K01442 | E3.5.1.24  | K01442                                           | 92.359 | 32.142 | 73.575 |
|        |            | g_Alistipes.s_Alistipes_shahii                   | 0      | 0.5498 | 0.1523 |
|        |            | g_Bacteroides.s_Bacteroides_thetaiotaomicron     | 11.885 | 16.106 | 17.883 |
|        |            | g_Enterococcus.s_Enterococcus_faecalis           | 0      | 0.0412 | 0      |
|        |            | g_Lactobacillus.s_Lactobacillus_delbrueckii      | 0      | 0.335  | 0.1437 |
|        |            | g_Lactobacillus.s_Lactobacillus_helveticus       | 0      | 0.0962 | 0      |
|        |            | g_Lactobacillus.s_Lactobacillus_johnsonii        | 72.553 | 12.908 | 50.213 |
|        |            | g_Lactobacillus.s_Lactobacillus_reuteri          | 6.0394 | 1.3452 | 3.697  |
|        |            | g_Lactococcus.s_Lactococcus_lactis               | 1.8818 | 0.7618 | 1.486  |
| K01442 | E3.5.1.24  | K01442                                           | 92.359 | 32.142 | 73.575 |
|        |            | g_Alistipes.s_Alistipes_shahii                   | 0      | 0.5498 | 0.1523 |
|        |            | g_Bacteroides.s_Bacteroides_thetaiotaomicron     | 11.885 | 16.106 | 17.883 |
|        |            | g_Enterococcus.s_Enterococcus_faecalis           | 0      | 0.0412 | 0      |

map00120  
Primary bile  
acid  
biosynthesis

|                                                     |             |                                                  |                                             |                                              |        |        |        |
|-----------------------------------------------------|-------------|--------------------------------------------------|---------------------------------------------|----------------------------------------------|--------|--------|--------|
| map00121_<br>Secondary<br>bile acid<br>biosynthesis | K07007      | baiN                                             | g_Lactobacillus.s_Lactobacillus_delbrueckii | 0                                            | 0.335  | 0.1437 |        |
|                                                     |             |                                                  | g_Lactobacillus.s_Lactobacillus_helveticus  | 0                                            | 0.0962 | 0      |        |
|                                                     |             |                                                  | g_Lactobacillus.s_Lactobacillus_johnsonii   | 72.553                                       | 12.908 | 50.213 |        |
|                                                     |             |                                                  | g_Lactobacillus.s_Lactobacillus_reuteri     | 6.0394                                       | 1.3452 | 3.697  |        |
|                                                     |             |                                                  | g_Lactococcus.s_Lactococcus_lactis          | 1.8818                                       | 0.7618 | 1.486  |        |
|                                                     |             |                                                  | K07007                                      | 1.4174                                       | 1.77   | 1.1667 |        |
|                                                     |             |                                                  | g_Alistipes.s_Alistipes_shahii              | 0                                            | 0.3112 | 0.151  |        |
|                                                     |             |                                                  | g_Enterococcus.s_Enterococcus_faecalis      | 0                                            | 0.0306 | 0.0495 |        |
|                                                     |             |                                                  | g_Escherichia.s_Escherichia_coli            | 0.6864                                       | 0.519  | 0.1653 |        |
|                                                     |             |                                                  | g_Lactococcus.s_Lactococcus_lactis          | 0.7312                                       | 0.9092 | 0.8008 |        |
| K00076                                              | hdhA        | K00076                                           | 1.8044                                      | 0.2756                                       | 0.0473 |        |        |
|                                                     |             | g_Escherichia.s_Escherichia_coli                 | 0.0964                                      | 0.2756                                       | 0.0473 |        |        |
|                                                     |             | K00076unclassified                               | 1.708                                       | 0                                            | 0      |        |        |
| K00016                                              | LDH, ldh    | K00016                                           | 112.93                                      | 29.277                                       | 95.643 |        |        |
|                                                     |             | g_Bifidobacterium.s_Bifidobacterium_pseudolongum | 0.0978                                      | 0.1072                                       | 0.7808 |        |        |
|                                                     |             | g_Corynebacterium.s_Corynebacterium_glutamicum   | 0.1856                                      | 1.5554                                       | 2.5247 |        |        |
|                                                     |             | g_Enterococcus.s_Enterococcus_faecalis           | 0                                           | 0.175                                        | 0.033  |        |        |
|                                                     |             | g_Klebsiella.s_Klebsiella_pneumoniae             | 0                                           | 0.6078                                       | 0      |        |        |
|                                                     |             | g_Lactobacillus.s_Lactobacillus_delbrueckii      | 0.9606                                      | 0.9334                                       | 0.2585 |        |        |
|                                                     |             | g_Lactobacillus.s_Lactobacillus_helveticus       | 0.5816                                      | 0.326                                        | 0.2458 |        |        |
|                                                     |             | g_Lactobacillus.s_Lactobacillus_johnsonii        | 64.978                                      | 12.267                                       | 49.18  |        |        |
|                                                     |             | g_Lactobacillus.s_Lactobacillus_reuteri          | 40.309                                      | 7.153                                        | 24.038 |        |        |
|                                                     |             | g_Lactococcus.s_Lactococcus_lactis               | 3.4188                                      | 3.0038                                       | 2.2945 |        |        |
|                                                     |             | g_Staphylococcus.s_Staphylococcus_xylosus        | 0.3018                                      | 0.2656                                       | 0.1492 |        |        |
|                                                     |             | g_Streptococcus.s_Streptococcus_thermophilus     | 0.6424                                      | 0.6768                                       | 0.4148 |        |        |
|                                                     |             | K00016unclassified                               | 1.453                                       | 2.2064                                       | 15.723 |        |        |
|                                                     |             | K01572                                           | oadB                                        | K01572                                       | 57.507 | 58.759 | 88.151 |
|                                                     |             |                                                  |                                             | g_Bacteroides.s_Bacteroides_thetaiotaomicron | 12.589 | 14.922 | 20.416 |
|                                                     |             |                                                  |                                             | g_Bacteroides.s_Bacteroides_uniformis        | 0      | 0.4174 | 0      |
| g_Klebsiella.s_Klebsiella_pneumoniae                | 0           |                                                  |                                             | 0.4322                                       | 0      |        |        |
| g_Parabacteroides.s_Parabacteroides_goldsteinii     | 3.2876      |                                                  |                                             | 2.6116                                       | 7.5237 |        |        |
| K01572unclassified                                  | 41.631      |                                                  |                                             | 40.376                                       | 60.211 |        |        |
| K00925                                              | 72.172      |                                                  |                                             | 45.05                                        | 72.987 |        |        |
| K00925                                              | ackA        | g_Aerococcus.s_Aerococcus_viridans               | 0                                           | 0.9598                                       | 1.3587 |        |        |
|                                                     |             | g_Alistipes.s_Alistipes_shahii                   | 0                                           | 0.7486                                       | 0.283  |        |        |
|                                                     |             | g_Bacteroides.s_Bacteroides_thetaiotaomicron     | 7.033                                       | 10.814                                       | 10.997 |        |        |
|                                                     |             | g_Corynebacterium.s_Corynebacterium_glutamicum   | 0.1072                                      | 0.821                                        | 1.947  |        |        |
|                                                     |             | g_Enterococcus.s_Enterococcus_faecalis           | 0.0574                                      | 0.203                                        | 0.0257 |        |        |
|                                                     |             | g_Enterorhabdus.s_Enterorhabdus_caecimuris       | 2.6516                                      | 7.7116                                       | 7.2655 |        |        |
|                                                     |             | g_Escherichia.s_Escherichia_coli                 | 0.4126                                      | 0.5178                                       | 0.0587 |        |        |
|                                                     |             | g_Klebsiella.s_Klebsiella_pneumoniae             | 0                                           | 0.4258                                       | 0      |        |        |
|                                                     |             | g_Lactobacillus.s_Lactobacillus_delbrueckii      | 0.2416                                      | 0.2746                                       | 0.057  |        |        |
|                                                     |             | g_Lactobacillus.s_Lactobacillus_helveticus       | 0.3942                                      | 0.4226                                       | 0.0547 |        |        |
|                                                     |             | g_Lactobacillus.s_Lactobacillus_johnsonii        | 44.822                                      | 6.6294                                       | 27.367 |        |        |
|                                                     |             | g_Lactobacillus.s_Lactobacillus_reuteri          | 5.7598                                      | 1.112                                        | 4.5765 |        |        |
|                                                     |             | g_Lactococcus.s_Lactococcus_lactis               | 1.6906                                      | 1.7906                                       | 1.335  |        |        |
|                                                     |             | g_Lactococcus.s_Lactococcus_raffinolactis        | 0.1098                                      | 0                                            | 0.028  |        |        |
|                                                     |             | g_Leuconostoc.s_Leuconostoc_lactis               | 0.0272                                      | 0                                            | 0      |        |        |
|                                                     |             | g_Leuconostoc.s_Leuconostoc_mesenteroides        | 0.151                                       | 0.3996                                       | 0.2243 |        |        |
|                                                     |             | g_Proteus.s_Proteus_mirabilis                    | 0.0284                                      | 0.0878                                       | 0      |        |        |
|                                                     |             | g_Staphylococcus.s_Staphylococcus_xylosus        | 0.7296                                      | 0.5602                                       | 0.2367 |        |        |
|                                                     |             | g_Streptococcus.s_Streptococcus_thermophilus     | 0.4976                                      | 0.528                                        | 0.862  |        |        |
| K00925unclassified                                  | 7.4588      | 11.044                                           | 16.31                                       |                                              |        |        |        |
| K00626                                              | E2.3.1.9, ε | K00626                                           | 71.659                                      | 38.462                                       | 61.992 |        |        |
|                                                     |             | g_Aerococcus.s_Aerococcus_viridans               | 0                                           | 1.5938                                       | 2.1997 |        |        |
|                                                     |             | g_Corynebacterium.s_Corynebacterium_glutamicum   | 0.2034                                      | 1.2244                                       | 2.2053 |        |        |
|                                                     |             | g_Debaryomyces.s_Debaryomyces_hansenii           | 2.8842                                      | 2.5722                                       | 1.175  |        |        |
|                                                     |             | g_Enterococcus.s_Enterococcus_faecalis           | 0                                           | 0.015                                        | 0      |        |        |

|        |             |                                                        |        |        |        |
|--------|-------------|--------------------------------------------------------|--------|--------|--------|
|        |             | <i>g_Escherichia.s_Escherichia_coli</i>                | 0.9256 | 0.633  | 0      |
|        |             | <i>g_Klebsiella.s_Klebsiella_pneumoniae</i>            | 0      | 0.3738 | 0      |
|        |             | <i>g_Lactobacillus.s_Lactobacillus_delbrueckii</i>     | 0.2302 | 0.2006 | 0.0588 |
|        |             | <i>g_Lactobacillus.s_Lactobacillus_helveticus</i>      | 0.0722 | 0.1626 | 0.0592 |
|        |             | <i>g_Lactobacillus.s_Lactobacillus_johnsonii</i>       | 25.602 | 3.3042 | 16.588 |
|        |             | <i>g_Lactobacillus.s_Lactobacillus_reuteri</i>         | 9.784  | 1.7638 | 6.3277 |
|        |             | <i>g_Lactococcus.s_Lactococcus_lactis</i>              | 1.2286 | 1.3056 | 1.0962 |
|        |             | K00626unclassified                                     | 30.728 | 25.313 | 32.282 |
| K01610 | E4.1.1.49,  | K01610                                                 | 47.831 | 52.05  | 62.892 |
|        |             | <i>g_Bacteroides.s_Bacteroides_thetaiotaomicron</i>    | 10.069 | 13.441 | 15.012 |
|        |             | <i>g_Bacteroides.s_Bacteroides_uniformis</i>           | 0      | 6.1084 | 0      |
|        |             | <i>g_Debaryomyces.s_Debaryomyces_hansenii</i>          | 3.6914 | 2.1228 | 0.85   |
|        |             | <i>g_Enterococcus.s_Enterococcus_faecalis</i>          | 0      | 0      | 0.0352 |
|        |             | <i>g_Escherichia.s_Escherichia_coli</i>                | 0.6424 | 0.4978 | 0.0773 |
|        |             | <i>g_Klebsiella.s_Klebsiella_pneumoniae</i>            | 0      | 0.4936 | 0      |
|        |             | <i>g_Lactobacillus.s_Lactobacillus_helveticus</i>      | 0.109  | 0.243  | 0.0352 |
|        |             | <i>g_Parabacteroides.s_Parabacteroides_goldsteinii</i> | 5.9018 | 7.3852 | 12.762 |
|        |             | <i>g_Proteus.s_Proteus_mirabilis</i>                   | 0.0406 | 0.0238 | 0      |
|        |             | <i>g_Staphylococcus.s_Staphylococcus_xylosus</i>       | 0.734  | 0.6802 | 0.2692 |
|        |             | K01610unclassified                                     | 26.643 | 21.054 | 33.851 |
| K01006 | ppdK        | K01006                                                 | 47.397 | 36.995 | 50.118 |
|        |             | <i>g_Enterococcus.s_Enterococcus_faecalis</i>          | 0.012  | 0      | 0      |
|        |             | K01006unclassified                                     | 47.385 | 36.995 | 50.118 |
| K01649 | leuA, IMSK  | K01649                                                 | 30.5   | 46.937 | 53.246 |
|        |             | <i>g_Alistipes.s_Alistipes_finegoldii</i>              | 0      | 0.0764 | 0      |
|        |             | <i>g_Bacteroides.s_Bacteroides_thetaiotaomicron</i>    | 6.3634 | 9.223  | 9.5927 |
|        |             | <i>g_Corynebacterium.s_Corynebacterium_glutamicum</i>  | 0.1704 | 1.0372 | 2.4268 |
|        |             | <i>g_Debaryomyces.s_Debaryomyces_hansenii</i>          | 6.0628 | 4.3044 | 1.988  |
|        |             | <i>g_Enterorhabdus.s_Enterorhabdus_caecimuris</i>      | 4.9134 | 17.064 | 13.502 |
|        |             | <i>g_Escherichia.s_Escherichia_coli</i>                | 1.0062 | 0.9238 | 0.0217 |
|        |             | <i>g_Klebsiella.s_Klebsiella_pneumoniae</i>            | 0      | 1.0372 | 0      |
|        |             | <i>g_Lactococcus.s_Lactococcus_lactis</i>              | 0.0766 | 0.1468 | 1.4947 |
|        |             | <i>g_Lactococcus.s_Lactococcus_raffinolactis</i>       | 0.0598 | 0.0938 | 0.1798 |
|        |             | <i>g_Proteus.s_Proteus_mirabilis</i>                   | 0.0634 | 0.0494 | 0      |
|        |             | <i>g_Staphylococcus.s_Staphylococcus_xylosus</i>       | 0.6354 | 0.4582 | 0.4455 |
|        |             | <i>g_Streptococcus.s_Streptococcus_thermophilus</i>    | 0.4302 | 0.8502 | 0.3107 |
|        |             | K01649unclassified                                     | 10.718 | 11.672 | 23.283 |
| K00625 | E2.3.1.8, r | K00625                                                 | 33.307 | 44.19  | 52.443 |
|        |             | <i>g_Aerococcus.s_Aerococcus_viridans</i>              | 0      | 0.7184 | 1.7502 |
|        |             | <i>g_Bacteroides.s_Bacteroides_thetaiotaomicron</i>    | 6.4412 | 9.7586 | 9.3955 |
|        |             | <i>g_Enterococcus.s_Enterococcus_faecalis</i>          | 0.0358 | 0.0418 | 0.0637 |
|        |             | <i>g_Lactobacillus.s_Lactobacillus_delbrueckii</i>     | 0.2648 | 0.2    | 0.1705 |
|        |             | <i>g_Lactobacillus.s_Lactobacillus_reuteri</i>         | 8.0492 | 1.6578 | 4.2793 |
|        |             | <i>g_Lactococcus.s_Lactococcus_lactis</i>              | 0.8836 | 1.0004 | 0.5597 |
|        |             | <i>g_Parabacteroides.s_Parabacteroides_goldsteinii</i> | 3.1954 | 3.0042 | 6.3298 |
|        |             | <i>g_Staphylococcus.s_Staphylococcus_xylosus</i>       | 0.7976 | 0.8544 | 0.5297 |
|        |             | K00625unclassified                                     | 13.639 | 26.954 | 29.364 |
| K03737 | por, nifJ   | K03737                                                 | 50.752 | 35.958 | 42.417 |
|        |             | <i>g_Escherichia.s_Escherichia_coli</i>                | 0.1124 | 0.055  | 0      |
|        |             | <i>g_Klebsiella.s_Klebsiella_pneumoniae</i>            | 0      | 0.2408 | 0      |
|        |             | K03737unclassified                                     | 50.64  | 35.662 | 42.417 |
| K00175 | korB, oor   | K00175                                                 | 33.585 | 40.981 | 44.244 |
|        |             | <i>g_Bacteroides.s_Bacteroides_thetaiotaomicron</i>    | 14.626 | 18.831 | 18.709 |
|        |             | <i>g_Enterorhabdus.s_Enterorhabdus_caecimuris</i>      | 0.677  | 1.9052 | 1.3792 |
|        |             | <i>g_Parabacteroides.s_Parabacteroides_goldsteinii</i> | 3.824  | 3.7356 | 6.9213 |
|        |             | K00175unclassified                                     | 14.458 | 16.509 | 17.235 |
| K03778 | ldhA        | K03778                                                 | 60.728 | 14.28  | 39.553 |
|        |             | <i>g_Alistipes.s_Alistipes_shahii</i>                  | 0      | 0.7892 | 0.1942 |

|        |            |                                                         |        |        |        |
|--------|------------|---------------------------------------------------------|--------|--------|--------|
|        |            | <i>g_Escherichia.s_Escherichia_coli</i>                 | 0.3074 | 0.4334 | 0.0672 |
|        |            | <i>g_Klebsiella.s_Klebsiella_pneumoniae</i>             | 0      | 0.1736 | 0      |
|        |            | <i>g_Lactobacillus.s_Lactobacillus_delbrueckii</i>      | 1.222  | 1.8764 | 1.0257 |
|        |            | <i>g_Lactobacillus.s_Lactobacillus_helveticus</i>       | 0.5058 | 0.0658 | 0.2313 |
|        |            | <i>g_Lactobacillus.s_Lactobacillus_johnsonii</i>        | 30.266 | 5.4094 | 19.918 |
|        |            | <i>g_Lactobacillus.s_Lactobacillus_reuteri</i>          | 27.893 | 5.2142 | 17.843 |
|        |            | <i>g_Leuconostoc.s_Leuconostoc_lactis</i>               | 0      | 0      | 0.0625 |
|        |            | <i>g_Leuconostoc.s_Leuconostoc_mesenteroides</i>        | 0.254  | 0.318  | 0.2117 |
|        |            | K03778unclassified                                      | 0.2782 | 0      | 0      |
| K01961 | accC       | K01961                                                  | 30.76  | 38.892 | 40.803 |
|        |            | <i>g_Aerococcus.s_Aerococcus_viridans</i>               | 0      | 1.1372 | 0.69   |
|        |            | <i>g_Bacteroides.s_Bacteroides_thetaiotaomicron</i>     | 7.45   | 9.3336 | 9.442  |
|        |            | <i>g_Enterorhabdus.s_Enterorhabdus_caecimuris</i>       | 2.4898 | 7.5372 | 5.5873 |
|        |            | <i>g_Escherichia.s_Escherichia_coli</i>                 | 0.924  | 0.6108 | 0.0663 |
|        |            | <i>g_Klebsiella.s_Klebsiella_pneumoniae</i>             | 0      | 0.8394 | 0      |
|        |            | <i>g_Lactobacillus.s_Lactobacillus_delbrueckii</i>      | 0.3604 | 0.4654 | 0.1655 |
|        |            | <i>g_Lactobacillus.s_Lactobacillus_helveticus</i>       | 0.0854 | 0.1266 | 0.0712 |
|        |            | <i>g_Lactobacillus.s_Lactobacillus_reuteri</i>          | 5.7874 | 0.798  | 3.5358 |
|        |            | <i>g_Lactococcus.s_Lactococcus_lactis</i>               | 0.7044 | 1.0254 | 0.4613 |
|        |            | <i>g_Leuconostoc.s_Leuconostoc_lactis</i>               | 0      | 0      | 0.0433 |
|        |            | <i>g_Leuconostoc.s_Leuconostoc_mesenteroides</i>        | 0.025  | 0      | 0.0298 |
|        |            | <i>g_Proteus.s_Proteus_mirabilis</i>                    | 0      | 0.0744 | 0      |
|        |            | <i>g_Staphylococcus.s_Staphylococcus_xylosum</i>        | 0.7374 | 0.5824 | 0.2248 |
|        |            | <i>g_Streptococcus.s_Streptococcus_thermophilus</i>     | 0.4502 | 0.4794 | 0.5307 |
|        |            | K01961unclassified                                      | 11.745 | 15.882 | 19.955 |
| K01571 | oadA       | K01571                                                  | 28.132 | 33.076 | 31.046 |
|        |            | <i>g_Enterorhabdus.s_Enterorhabdus_caecimuris</i>       | 3.0136 | 9.5106 | 7.532  |
|        |            | <i>g_Eubacterium.s_Eubacterium_plexicaudatum</i>        | 0.028  | 0.0242 | 0      |
|        |            | <i>g_Klebsiella.s_Klebsiella_pneumoniae</i>             | 0      | 0.5656 | 0      |
|        |            | K01571unclassified                                      | 25.09  | 22.976 | 23.514 |
| K00873 | PK, pyk    | K00873                                                  | 27.381 | 29.173 | 34.432 |
|        |            | <i>g_Aerococcus.s_Aerococcus_viridans</i>               | 0.0504 | 1.5808 | 2.5435 |
|        |            | <i>g_Alistipes.s_Alistipes_shahii</i>                   | 0      | 0.3264 | 0.264  |
|        |            | <i>g_Bacteroides.s_Bacteroides_thetaiotaomicron</i>     | 8.0242 | 10.642 | 10.76  |
|        |            | <i>g_Bifidobacterium.s_Bifidobacterium_pseudolongum</i> | 0.1276 | 0.1358 | 0.6548 |
|        |            | <i>g_Corynebacterium.s_Corynebacterium_glutamicum</i>   | 0.1882 | 2.5728 | 4.0065 |
|        |            | <i>g_Debaryomyces.s_Debaryomyces_hansenii</i>           | 3.9572 | 2.1684 | 1.0065 |
|        |            | <i>g_Escherichia.s_Escherichia_coli</i>                 | 1.027  | 1.2106 | 0.0657 |
|        |            | <i>g_Klebsiella.s_Klebsiella_pneumoniae</i>             | 0      | 0.2628 | 0      |
|        |            | <i>g_Lactobacillus.s_Lactobacillus_delbrueckii</i>      | 0.1984 | 0.2148 | 0.0698 |
|        |            | <i>g_Lactobacillus.s_Lactobacillus_helveticus</i>       | 0.196  | 0.1222 | 0.0368 |
|        |            | <i>g_Lactobacillus.s_Lactobacillus_murinus</i>          | 2.0392 | 2.0868 | 0.4272 |
|        |            | <i>g_Lactobacillus.s_Lactobacillus_reuteri</i>          | 6.1448 | 1.2    | 3.222  |
|        |            | <i>g_Lactococcus.s_Lactococcus_lactis</i>               | 0.854  | 0.8276 | 0.3952 |
|        |            | <i>g_Meyerozyma.s_Meyerozyma_guilliermondii</i>         | 0.0436 | 0      | 0      |
|        |            | <i>g_Proteus.s_Proteus_mirabilis</i>                    | 0.108  | 0.0636 | 0      |
|        |            | <i>g_Staphylococcus.s_Staphylococcus_xylosum</i>        | 0.7648 | 0.6506 | 0.392  |
|        |            | K00873unclassified                                      | 3.6574 | 5.1072 | 10.588 |
| K00027 | ME2, sfcAK | K00027                                                  | 27.924 | 22.54  | 37.752 |
|        |            | <i>g_Debaryomyces.s_Debaryomyces_hansenii</i>           | 3.0468 | 3.0122 | 0.841  |
|        |            | <i>g_Enterococcus.s_Enterococcus_faecalis</i>           | 0.0292 | 0.0616 | 0.0513 |
|        |            | <i>g_Escherichia.s_Escherichia_coli</i>                 | 0.4324 | 1.0612 | 0.1395 |
|        |            | <i>g_Klebsiella.s_Klebsiella_pneumoniae</i>             | 0      | 0.1854 | 0      |
|        |            | <i>g_Lactobacillus.s_Lactobacillus_reuteri</i>          | 4.9204 | 1.0866 | 2.9497 |
|        |            | <i>g_Proteus.s_Proteus_mirabilis</i>                    | 0      | 0.0192 | 0      |
|        |            | <i>g_Staphylococcus.s_Staphylococcus_xylosum</i>        | 0.6254 | 0.413  | 0.1017 |
|        |            | K00027unclassified                                      | 18.87  | 16.701 | 33.669 |
| K00024 | mdh        | K00024                                                  | 18.022 | 26.657 | 38.973 |

|        |                                                 |        |        |        |
|--------|-------------------------------------------------|--------|--------|--------|
|        | g_Alistipes.s_Alistipes_shahii                  | 0      | 1.22   | 0.5095 |
|        | g_Bacteroides.s_Bacteroides_thetaiotaomicron    | 12.719 | 12.416 | 17.867 |
|        | g_Bacteroides.s_Bacteroides_uniformis           | 0      | 5.8926 | 0      |
|        | g_Corynebacterium.s_Corynebacterium_glutamicum  | 0      | 1.064  | 1.7278 |
|        | g_Escherichia.s_Escherichia_coli                | 1.057  | 0.4512 | 0      |
|        | g_Klebsiella.s_Klebsiella_pneumoniae            | 0      | 0.8196 | 0      |
|        | g_Parabacteroides.s_Parabacteroides_goldsteinii | 2.378  | 2.295  | 6.7952 |
|        | g_Staphylococcus.s_Staphylococcus_lentus        | 0.7094 | 0      | 1.1085 |
|        | K00024unclassified                              | 1.1586 | 2.4986 | 10.965 |
| K00382 | DLD, lpd, K00382                                | 20.384 | 22.183 | 35.255 |
|        | g_Aerococcus.s_Aerococcus_viridans              | 0.0282 | 1.1376 | 1.1237 |
|        | g_Alistipes.s_Alistipes_shahii                  | 0      | 0.4702 | 0.1685 |
|        | g_Bacteroides.s_Bacteroides_thetaiotaomicron    | 5.1822 | 7.1946 | 8.3845 |
|        | g_Corynebacterium.s_Corynebacterium_glutamicum  | 0.1736 | 1.419  | 2.1947 |
|        | g_Debaryomyces.s_Debaryomyces_hansenii          | 3.4276 | 2.2896 | 1.013  |
|        | g_Enterococcus.s_Enterococcus_faecalis          | 0      | 2.3126 | 0.0483 |
|        | g_Escherichia.s_Escherichia_coli                | 0.9426 | 0.9026 | 0.0855 |
|        | g_Klebsiella.s_Klebsiella_pneumoniae            | 0      | 0.2652 | 0      |
|        | g_Lactobacillus.s_Lactobacillus_reuteri         | 6.6142 | 1.0754 | 3.6773 |
|        | g_Lactococcus.s_Lactococcus_lactis              | 1.1106 | 0.8538 | 0.6305 |
|        | g_Leuconostoc.s_Leuconostoc_mesenteroides       | 0.1454 | 0.1552 | 0.1507 |
|        | g_Meyerozyma.s_Meyerozyma_guilliermondii        | 0.0224 | 0      | 0      |
|        | g_Proteus.s_Proteus_mirabilis                   | 0      | 0.0206 | 0      |
|        | g_Staphylococcus.s_Staphylococcus_xylosus       | 0.8618 | 0.5668 | 0.623  |
|        | g_Streptococcus.s_Streptococcus_thermophilus    | 0.5502 | 0.3934 | 0.3417 |
|        | K00382unclassified                              | 1.3252 | 3.126  | 16.813 |
| K01679 | E4.2.1.2B, K01679                               | 33.325 | 11.528 | 28.487 |
|        | g_Corynebacterium.s_Corynebacterium_glutamicum  | 0.0958 | 1.3188 | 2.2597 |
|        | g_Debaryomyces.s_Debaryomyces_hansenii          | 3.5058 | 2.0074 | 1.1263 |
|        | g_Escherichia.s_Escherichia_coli                | 0.443  | 0.2964 | 0      |
|        | g_Lactobacillus.s_Lactobacillus_delbrueckii     | 0.3838 | 0.609  | 0.0697 |
|        | g_Lactobacillus.s_Lactobacillus_helveticus      | 0.0462 | 0.1866 | 0.0717 |
|        | g_Lactobacillus.s_Lactobacillus_johnsonii       | 17.71  | 3.4362 | 13.447 |
|        | g_Lactobacillus.s_Lactobacillus_reuteri         | 7.8402 | 1.169  | 4.6663 |
|        | g_Proteus.s_Proteus_mirabilis                   | 0.0238 | 0.028  | 0      |
|        | K01679unclassified                              | 3.2772 | 2.4768 | 6.8458 |
| K01512 | acyP, K01512                                    | 37.121 | 10.135 | 23.003 |
|        | g_Corynebacterium.s_Corynebacterium_glutamicum  | 0      | 0.7326 | 1.4322 |
|        | g_Escherichia.s_Escherichia_coli                | 0.9246 | 0.5946 | 0      |
|        | g_Klebsiella.s_Klebsiella_pneumoniae            | 0      | 0.2626 | 0      |
|        | g_Lactobacillus.s_Lactobacillus_delbrueckii     | 1.0014 | 0      | 0      |
|        | g_Lactobacillus.s_Lactobacillus_johnsonii       | 24.204 | 6.2818 | 15.637 |
|        | g_Lactobacillus.s_Lactobacillus_reuteri         | 7.7238 | 1.311  | 1.8035 |
|        | g_Lactococcus.s_Lactococcus_lactis              | 0.6568 | 0.4606 | 0.202  |
|        | g_Leuconostoc.s_Leuconostoc_mesenteroides       | 0.4812 | 0      | 0.4288 |
|        | g_Streptococcus.s_Streptococcus_thermophilus    | 0.459  | 0.4494 | 0.4647 |
|        | K01512unclassified                              | 1.6702 | 0.0428 | 3.0352 |
| K00244 | frdA, K00244                                    | 28.686 | 11.35  | 23.372 |
|        | g_Enterorhabdus.s_Enterorhabdus_caecimuris      | 0.0288 | 0      | 0      |
|        | g_Escherichia.s_Escherichia_coli                | 0.569  | 0.6034 | 0.0718 |
|        | g_Klebsiella.s_Klebsiella_pneumoniae            | 0      | 0.3346 | 0      |
|        | g_Lactobacillus.s_Lactobacillus_delbrueckii     | 0.7546 | 0.7106 | 0.0718 |
|        | g_Lactobacillus.s_Lactobacillus_helveticus      | 0.041  | 0.226  | 0.0488 |
|        | g_Lactobacillus.s_Lactobacillus_johnsonii       | 17.859 | 3.7252 | 12.137 |
|        | g_Lactobacillus.s_Lactobacillus_reuteri         | 5.6926 | 1.197  | 3.7872 |
|        | g_Lactococcus.s_Lactococcus_lactis              | 0.6842 | 0.4684 | 0.4605 |
|        | g_Leuconostoc.s_Leuconostoc_mesenteroides       | 0.0794 | 0.1248 | 0.3245 |
|        | g_Proteus.s_Proteus_mirabilis                   | 0      | 0.038  | 0      |

|            |             |                                                 |        |        |        |
|------------|-------------|-------------------------------------------------|--------|--------|--------|
|            |             | K00244unclassified                              | 2.9772 | 3.9218 | 6.4703 |
| K00156     | poxB        | K00156                                          | 10.982 | 18.673 | 27.716 |
|            |             | g_Bacteroides.s_Bacteroides_thetaiotaomicron    | 9.945  | 16.695 | 17.628 |
|            |             | g_Escherichia.s_Escherichia_coli                | 0.5634 | 0.5936 | 0.0528 |
|            |             | g_Klebsiella.s_Klebsiella_pneumoniae            | 0      | 0.2722 | 0      |
|            |             | g_Proteus.s_Proteus_mirabilis                   | 0.0758 | 0.0782 | 0      |
|            |             | K00156unclassified                              | 0.3974 | 1.0332 | 10.035 |
| K01759     | GLO1, glc   | K01759                                          | 11.325 | 17.715 | 24.633 |
|            |             | g_Aerococcus.s_Aerococcus_viridans              | 0      | 2.2608 | 1.9843 |
|            |             | g_Alistipes.s_Alistipes_shahii                  | 0      | 0.4872 | 0.3873 |
|            |             | g_Bacteroides.s_Bacteroides_thetaiotaomicron    | 4.0842 | 4.3482 | 5.447  |
|            |             | g_Debaryomyces.s_Debaryomyces_hansenii          | 2.8768 | 2.2754 | 0.624  |
|            |             | g_Escherichia.s_Escherichia_coli                | 0      | 0.5634 | 0      |
|            |             | g_Klebsiella.s_Klebsiella_pneumoniae            | 0      | 0.1486 | 0      |
|            |             | g_Lactococcus.s_Lactococcus_lactis              | 0.5952 | 0      | 0.5873 |
|            |             | g_Streptococcus.s_Streptococcus_thermophilus    | 0.8374 | 0.886  | 0.7652 |
|            |             | K01759unclassified                              | 2.9316 | 6.7454 | 14.838 |
| K00158     | E1.2.3.3, r | K00158                                          | 22.902 | 7.9566 | 20.81  |
| map00620_  |             | g_Aerococcus.s_Aerococcus_viridans              | 0      | 0.9874 | 1.1643 |
| Pyruvate   |             | g_Enterococcus.s_Enterococcus_faecalis          | 0      | 0.022  | 0      |
| metabolism |             | g_Lactobacillus.s_Lactobacillus_delbrueckii     | 0.767  | 1.304  | 0.254  |
|            |             | g_Lactobacillus.s_Lactobacillus_johnsonii       | 20.052 | 4.0294 | 17.608 |
|            |             | g_Lactococcus.s_Lactococcus_lactis              | 1.1656 | 0.9688 | 1.087  |
|            |             | g_Lactococcus.s_Lactococcus_raffinolactis       | 0.0234 | 0      | 0.0185 |
|            |             | g_Staphylococcus.s_Staphylococcus_xylosus       | 0.8932 | 0.6452 | 0.678  |
| K01573     | oadG        | K01573                                          | 13.692 | 12.136 | 21.995 |
|            |             | g_Bacteroides.s_Bacteroides_thetaiotaomicron    | 6.7562 | 6.5928 | 13.381 |
|            |             | K01573unclassified                              | 6.9356 | 5.543  | 8.614  |
| K00174     | korA, oor   | K00174                                          | 10.876 | 14.79  | 19.439 |
|            |             | g_Alistipes.s_Alistipes_shahii                  | 0      | 0.4878 | 0.239  |
|            |             | g_Bacteroides.s_Bacteroides_uniformis           | 0      | 0.4094 | 0      |
|            |             | g_Enterorhabdus.s_Enterorhabdus_caecimuris      | 1.0782 | 3.0664 | 2.6482 |
|            |             | g_Parabacteroides.s_Parabacteroides_goldsteinii | 2.827  | 2.3198 | 5.6347 |
|            |             | K00174unclassified                              | 6.971  | 8.5066 | 10.917 |
| K01963     | accD        | K01963                                          | 18.376 | 14.13  | 11.767 |
|            |             | g_Aerococcus.s_Aerococcus_viridans              | 0      | 0.856  | 0.5132 |
|            |             | g_Corynebacterium.s_Corynebacterium_glutamicum  | 0.0544 | 1.4522 | 2.1853 |
|            |             | g_Enterococcus.s_Enterococcus_faecalis          | 0.0832 | 0.0486 | 0.1112 |
|            |             | g_Escherichia.s_Escherichia_coli                | 0.6276 | 0.7632 | 0.0347 |
|            |             | g_Klebsiella.s_Klebsiella_pneumoniae            | 0      | 0.1344 | 0      |
|            |             | g_Lactobacillus.s_Lactobacillus_delbrueckii     | 0.2654 | 0.3056 | 0.038  |
|            |             | g_Lactobacillus.s_Lactobacillus_helveticus      | 0.0512 | 0.5064 | 0.0438 |
|            |             | g_Lactobacillus.s_Lactobacillus_reuteri         | 4.0608 | 1.0862 | 3.0622 |
|            |             | g_Lactococcus.s_Lactococcus_lactis              | 0.6636 | 0.5402 | 0.8495 |
|            |             | g_Lactococcus.s_Lactococcus_raffinolactis       | 0      | 0.043  | 0      |
|            |             | g_Leuconostoc.s_Leuconostoc_mesenteroides       | 0.0412 | 0.1848 | 0.204  |
|            |             | g_Staphylococcus.s_Staphylococcus_xylosus       | 0.956  | 0.2976 | 0.3282 |
|            |             | g_Streptococcus.s_Streptococcus_thermophilus    | 0.5716 | 0.389  | 0.4928 |
|            |             | K01963unclassified                              | 11.001 | 7.5222 | 3.9045 |
| K23257     | yvgN        | K23257                                          | 20.561 | 6.2842 | 14.394 |
|            |             | g_Aerococcus.s_Aerococcus_viridans              | 0.0536 | 0.5638 | 1.8145 |
|            |             | g_Lactobacillus.s_Lactobacillus_reuteri         | 20.271 | 4.7222 | 12.045 |
|            |             | g_Lactococcus.s_Lactococcus_lactis              | 0.2374 | 0.9982 | 0.5337 |
| K00656     | E2.3.1.54,  | K00656                                          | 13.29  | 14.204 | 13.106 |
|            |             | g_Escherichia.s_Escherichia_coli                | 1.9594 | 1.3866 | 0.0265 |
|            |             | g_Klebsiella.s_Klebsiella_pneumoniae            | 0      | 0.4656 | 0      |
|            |             | g_Lactococcus.s_Lactococcus_lactis              | 0.6034 | 0.8386 | 0.6592 |
|            |             | K00656unclassified                              | 10.727 | 11.514 | 12.42  |

|        |                  |                                                |        |        |        |
|--------|------------------|------------------------------------------------|--------|--------|--------|
| K00128 | ALDH             | K00128                                         | 12.097 | 10.635 | 16.006 |
|        |                  | g_Aerococcus.s_Aerococcus_viridans             | 0.028  | 0.5772 | 1.2963 |
|        |                  | g_Alistipes.s_Alistipes_shahii                 | 0      | 0.5984 | 0.0972 |
|        |                  | g_Debaryomyces.s_Debaryomyces_hansenii         | 10.967 | 8.1784 | 3.5058 |
|        |                  | g_Meyerozyma.s_Meyerozyma_guilliermondii       | 0.0394 | 0      | 0      |
|        |                  | K00128unclassified                             | 1.0616 | 1.2814 | 11.107 |
| K22211 | GLX3, HSK22211   |                                                | 19.31  | 14.72  | 5.5475 |
|        |                  | g_Debaryomyces.s_Debaryomyces_hansenii         | 19.31  | 14.72  | 5.5475 |
| K01960 | pycB             | K01960                                         | 8.4934 | 14.117 | 13.43  |
|        |                  | g_Bacteroides.s_Bacteroides_thetaiotaomicron   | 5.2834 | 7.4298 | 9.1633 |
|        |                  | g_Bacteroides.s_Bacteroides_uniformis          | 0      | 3.6428 | 0      |
|        |                  | K01960unclassified                             | 3.21   | 3.044  | 4.2663 |
| K01895 | ACSS, acsK01895  |                                                | 5.473  | 14.73  | 15.043 |
|        |                  | g_Alistipes.s_Alistipes_shahii                 | 0      | 0.4782 | 0.2313 |
|        |                  | g_Enterorhabdus.s_Enterorhabdus_caecimuris     | 2.8864 | 9.2162 | 7.1207 |
|        |                  | g_Escherichia.s_Escherichia_coli               | 0      | 0.033  | 0      |
|        |                  | g_Klebsiella.s_Klebsiella_pneumoniae           | 0      | 0.3264 | 0      |
|        |                  | g_Staphylococcus.s_Staphylococcus_xylosum      | 0.8274 | 0.3712 | 0.4298 |
|        |                  | K01895unclassified                             | 1.7588 | 4.3048 | 7.261  |
| K01677 | E4.2.1.2A        | K01677                                         | 11.935 | 11.915 | 10.218 |
|        |                  | K01677unclassified                             | 11.935 | 11.915 | 10.218 |
| K01678 | E4.2.1.2A        | K01678                                         | 12.219 | 9.0446 | 12.176 |
|        |                  | K01678unclassified                             | 12.219 | 9.0446 | 12.176 |
| K01595 | ppc              | K01595                                         | 13.179 | 2.2488 | 14.862 |
|        |                  | g_Lactobacillus.s_Lactobacillus_johnsonii      | 12.966 | 2.0688 | 11.397 |
|        |                  | g_Leuconostoc.s_Leuconostoc_mesenteroides      | 0.2124 | 0.1802 | 0.2887 |
|        |                  | K01595unclassified                             | 0      | 0      | 3.1763 |
| K00627 | DLAT, acK00627   |                                                | 11.558 | 7.6654 | 7.9968 |
|        |                  | g_Aerococcus.s_Aerococcus_viridans             | 0.0236 | 1.24   | 1.0133 |
|        |                  | g_Debaryomyces.s_Debaryomyces_hansenii         | 2.9364 | 2.8058 | 1.2058 |
|        |                  | g_Escherichia.s_Escherichia_coli               | 0.2836 | 0.1904 | 0.0152 |
|        |                  | g_Klebsiella.s_Klebsiella_pneumoniae           | 0      | 0.2664 | 0      |
|        |                  | g_Lactobacillus.s_Lactobacillus_reuteri        | 5.876  | 1.5222 | 3.6615 |
|        |                  | g_Lactococcus.s_Lactococcus_lactis             | 0.8062 | 0.6622 | 0.5928 |
|        |                  | g_Leuconostoc.s_Leuconostoc_mesenteroides      | 0.1508 | 0.058  | 0.244  |
|        |                  | g_Meyerozyma.s_Meyerozyma_guilliermondii       | 0.0234 | 0      | 0      |
|        |                  | g_Staphylococcus.s_Staphylococcus_xylosum      | 1.4576 | 0.9206 | 1.068  |
|        |                  | K00627unclassified                             | 0      | 0      | 0.196  |
| K00170 | porB             | K00170                                         | 9.322  | 7.7956 | 8.5498 |
|        |                  | K00170unclassified                             | 9.322  | 7.7956 | 8.5498 |
| K00162 | PDHB, pdK00162   |                                                | 10.545 | 6.0772 | 6.5642 |
|        |                  | g_Aerococcus.s_Aerococcus_viridans             | 0      | 1.5022 | 1.1098 |
|        |                  | g_Debaryomyces.s_Debaryomyces_hansenii         | 3.1704 | 2.3084 | 1.2042 |
|        |                  | g_Lactobacillus.s_Lactobacillus_reuteri        | 6.4646 | 1.1136 | 3.1885 |
|        |                  | g_Lactococcus.s_Lactococcus_lactis             | 0.664  | 0.8478 | 0.833  |
|        |                  | g_Leuconostoc.s_Leuconostoc_mesenteroides      | 0.0956 | 0.305  | 0.2283 |
|        |                  | K00162unclassified                             | 0.1506 | 0      | 0      |
| K01069 | gloB, gloCK01069 |                                                | 4.7976 | 6.9878 | 10.131 |
|        |                  | g_Aerococcus.s_Aerococcus_viridans             | 0      | 1.7908 | 2.2963 |
|        |                  | g_Alistipes.s_Alistipes_shahii                 | 0      | 0.427  | 0.1663 |
|        |                  | g_Corynebacterium.s_Corynebacterium_glutamicum | 0.3078 | 2.2012 | 6.1145 |
|        |                  | g_Debaryomyces.s_Debaryomyces_hansenii         | 3.0964 | 1.504  | 0.954  |
|        |                  | g_Escherichia.s_Escherichia_coli               | 1.0194 | 0.3342 | 0.1895 |
|        |                  | g_Klebsiella.s_Klebsiella_pneumoniae           | 0      | 0.2204 | 0      |
|        |                  | g_Lactococcus.s_Lactococcus_lactis             | 0.1198 | 0.3902 | 0.2712 |
|        |                  | g_Meyerozyma.s_Meyerozyma_guilliermondii       | 0.0418 | 0      | 0      |
|        |                  | g_Staphylococcus.s_Staphylococcus_xylosum      | 0.2126 | 0.1194 | 0.139  |
| K00161 | PDHA, pdK00161   |                                                | 10.77  | 4.42   | 5.9217 |



|        |                   |                                                |        |        |        |
|--------|-------------------|------------------------------------------------|--------|--------|--------|
|        |                   | g_Deбaryomyces.s_Deбaryomyces_hansenii         | 3.5882 | 1.7386 | 1.1207 |
|        |                   | g_Lactobacillus.s_Lactobacillus_reuteri        | 6.3764 | 1.3214 | 3.7093 |
|        |                   | g_Lactococcus.s_Lactococcus_lactis             | 0.6122 | 0.926  | 0.8008 |
|        |                   | g_Leuconostoc.s_Leuconostoc_mesenteroides      | 0.1928 | 0.434  | 0.1817 |
|        |                   | K00161unclassified                             | 0      | 0      | 0.1092 |
| K00116 | mgo               | K00116                                         | 3.2716 | 4.1998 | 12.078 |
|        |                   | g_Corynebacterium.s_Corynebacterium_glutamicum | 0.2796 | 1.445  | 2.1508 |
|        |                   | g_Escherichia.s_Escherichia_coli               | 0.531  | 0.4746 | 0.0532 |
|        |                   | g_Proteus.s_Proteus_mirabilis                  | 0.0664 | 0.0662 | 0      |
|        |                   | g_Staphylococcus.s_Staphylococcus_xylosum      | 1.8702 | 1.4422 | 0.7372 |
|        |                   | K00116unclassified                             | 0.5242 | 0.7716 | 9.1363 |
| K00026 | MDH2              | K00026                                         | 9.3308 | 7.1556 | 3.4865 |
|        |                   | g_Deбaryomyces.s_Deбaryomyces_hansenii         | 9.2962 | 6.8238 | 3.234  |
|        |                   | g_Meyerozyma.s_Meyerozyma_guilliermondii       | 0.0346 | 0      | 0      |
|        |                   | K00026unclassified                             | 0      | 0.3318 | 0.2525 |
| K01596 | E4.1.1.32, K01596 |                                                | 0.5712 | 2.2956 | 12.637 |
|        |                   | g_Corynebacterium.s_Corynebacterium_glutamicum | 0.19   | 1.2624 | 2.4665 |
|        |                   | K01596unclassified                             | 0.3812 | 1.0332 | 10.17  |
| K11263 | bccA, pcc.K11263  |                                                | 0      | 1.6778 | 12.671 |
|        |                   | K11263unclassified                             | 0      | 1.6778 | 12.671 |
| K22212 | mleA, mleK22212   |                                                | 6.8572 | 2.1456 | 4.811  |
|        |                   | g_Lactobacillus.s_Lactobacillus_reuteri        | 6.2882 | 1.4606 | 3.8043 |
|        |                   | g_Lactococcus.s_Lactococcus_lactis             | 0.569  | 0.685  | 0.9887 |
|        |                   | g_Leuconostoc.s_Leuconostoc_mesenteroides      | 0      | 0      | 0.018  |
| K02160 | accB, bccIK02160  |                                                | 7.0372 | 1.871  | 4.847  |
|        |                   | g_Escherichia.s_Escherichia_coli               | 0.7362 | 0.4022 | 0.0825 |
|        |                   | g_Lactobacillus.s_Lactobacillus_delbrueckii    | 0.3104 | 0      | 0      |
|        |                   | g_Lactobacillus.s_Lactobacillus_reuteri        | 4.3404 | 0.4174 | 3.1802 |
|        |                   | g_Lactococcus.s_Lactococcus_lactis             | 0.7604 | 0.7734 | 0.8972 |
|        |                   | g_Proteus.s_Proteus_mirabilis                  | 0.1852 | 0      | 0      |
|        |                   | g_Streptococcus.s_Streptococcus_thermophilus   | 0.7046 | 0.278  | 0.687  |
| K01655 | LYS21, L'K01655   |                                                | 6.0732 | 4.552  | 3.3823 |
|        |                   | g_Deбaryomyces.s_Deбaryomyces_hansenii         | 5.639  | 3.2392 | 1.837  |
|        |                   | K01655unclassified                             | 0.4342 | 1.3128 | 1.5453 |
| K00138 | aldB              | K00138                                         | 0.9774 | 1.7876 | 9.8015 |
|        |                   | g_Escherichia.s_Escherichia_coli               | 0.566  | 0.7036 | 0.0383 |
|        |                   | K00138unclassified                             | 0.4114 | 1.084  | 9.7633 |
| K00163 | aceE              | K00163                                         | 0.1566 | 2.3746 | 9.8505 |
|        |                   | g_Corynebacterium.s_Corynebacterium_glutamicum | 0.1566 | 1.1216 | 2.1127 |
|        |                   | g_Klebsiella.s_Klebsiella_pneumoniae           | 0      | 0.2932 | 0      |
|        |                   | K00163unclassified                             | 0      | 0.9594 | 7.7377 |
| K00101 | lldD              | K00101                                         | 6.0482 | 5.8926 | 1.7568 |
|        |                   | g_Deбaryomyces.s_Deбaryomyces_hansenii         | 5.3274 | 3.9024 | 1.6382 |
|        |                   | g_Escherichia.s_Escherichia_coli               | 0.7208 | 1.1814 | 0.1187 |
|        |                   | g_Klebsiella.s_Klebsiella_pneumoniae           | 0      | 0.8088 | 0      |
| K18118 | aarC, cat1 K18118 |                                                | 0.1046 | 1.864  | 9.927  |
|        |                   | g_Corynebacterium.s_Corynebacterium_glutamicum | 0.1046 | 0.9124 | 1.9715 |
|        |                   | K18118unclassified                             | 0      | 0.9518 | 7.9553 |
| K00102 | LDHD, dlK00102    |                                                | 6.311  | 4.5478 | 2.087  |
|        |                   | g_Deбaryomyces.s_Deбaryomyces_hansenii         | 6.2484 | 4.5478 | 2.087  |
|        |                   | g_Meyerozyma.s_Meyerozyma_guilliermondii       | 0.0624 | 0      | 0      |
| K00172 | porG              | K00172                                         | 5.0798 | 1.4052 | 4.376  |
|        |                   | K00172unclassified                             | 5.0798 | 1.4052 | 4.376  |
| K01962 | accA              | K01962                                         | 4.0258 | 4.6616 | 2.4557 |
|        |                   | g_Aerococcus.s_Aerococcus_viridans             | 0      | 0.971  | 0.5823 |
|        |                   | g_Enterococcus.s_Enterococcus_faecalis         | 0      | 0.1524 | 0.0415 |
|        |                   | g_Escherichia.s_Escherichia_coli               | 0.6068 | 0.6828 | 0      |
|        |                   | g_Klebsiella.s_Klebsiella_pneumoniae           | 0      | 0.5892 | 0      |

|        |             |                                                     |        |        |        |
|--------|-------------|-----------------------------------------------------|--------|--------|--------|
|        |             | <i>g_Lactobacillus.s_Lactobacillus_helveticus</i>   | 0.107  | 0.206  | 0      |
|        |             | <i>g_Lactococcus.s_Lactococcus_lactis</i>           | 0.4616 | 1.0996 | 0.3595 |
|        |             | <i>g_Leuconostoc.s_Leuconostoc_lactis</i>           | 0      | 0.062  | 0.2335 |
|        |             | <i>g_Proteus.s_Proteus_mirabilis</i>                | 0.1076 | 0.0862 | 0      |
|        |             | <i>g_Staphylococcus.s_Staphylococcus_xylosus</i>    | 0.839  | 0.2724 | 0.4453 |
|        |             | <i>g_Streptococcus.s_Streptococcus_thermophilus</i> | 0.5074 | 0.5402 | 0.5253 |
|        |             | K01962unclassified                                  | 1.3968 | 0      | 0.2682 |
| K01958 | PC, pyc     | K01958                                              | 0.5212 | 0.8734 | 8.1855 |
|        |             | K01958unclassified                                  | 0.5212 | 0.8734 | 8.1855 |
| K04072 | adhE        | K04072                                              | 2.8668 | 2.2428 | 4.4042 |
|        |             | <i>g_Klebsiella.s_Klebsiella_pneumoniae</i>         | 0      | 0.3986 | 0      |
|        |             | K04072unclassified                                  | 2.8668 | 1.8442 | 4.4042 |
| K01638 | aceB, glcE  | K01638                                              | 4.8416 | 2.9046 | 1.4615 |
|        |             | <i>g_Debaryomyces.s_Debaryomyces_hansenii</i>       | 2.9632 | 2.0312 | 1.2013 |
|        |             | <i>g_Escherichia.s_Escherichia_coli</i>             | 1.8378 | 0.8736 | 0.2603 |
|        |             | <i>g_Meyerozyma.s_Meyerozyma_guilliermondii</i>     | 0.0198 | 0      | 0      |
|        |             | <i>g_Proteus.s_Proteus_mirabilis</i>                | 0.0206 | 0      | 0      |
| K01007 | pps, ppsA   | K01007                                              | 3.4482 | 1.7026 | 1.0538 |
|        |             | <i>g_Klebsiella.s_Klebsiella_pneumoniae</i>         | 0      | 0.2156 | 0      |
|        |             | <i>g_Lactobacillus.s_Lactobacillus_delbrueckii</i>  | 0.3192 | 1.133  | 0.3047 |
|        |             | <i>g_Lactobacillus.s_Lactobacillus_reuteri</i>      | 1.5766 | 0.257  | 0.6752 |
|        |             | <i>g_Lactococcus.s_Lactococcus_raffinolactis</i>    | 0      | 0.0968 | 0.0737 |
|        |             | K01007unclassified                                  | 1.5522 | 0      | 0      |
| K21618 | DLD3        | K21618                                              | 3.1934 | 2.1958 | 0.8328 |
|        |             | <i>g_Debaryomyces.s_Debaryomyces_hansenii</i>       | 3.1934 | 2.1958 | 0.8328 |
| K01067 | E3.1.2.1, / | K01067                                              | 2.9306 | 1.8598 | 1.147  |
|        |             | <i>g_Debaryomyces.s_Debaryomyces_hansenii</i>       | 2.9306 | 1.8598 | 1.147  |
| K00245 | frdB        | K00245                                              | 4.704  | 1.2588 | 0.0453 |
|        |             | <i>g_Escherichia.s_Escherichia_coli</i>             | 0.9732 | 0.7312 | 0.0453 |
|        |             | <i>g_Klebsiella.s_Klebsiella_pneumoniae</i>         | 0      | 0.5278 | 0      |
|        |             | <i>g_Proteus.s_Proteus_mirabilis</i>                | 0.1014 | 0      | 0      |
|        |             | K00245unclassified                                  | 3.6296 | 0      | 0      |
| K04073 | mhpF        | K04073                                              | 0.7344 | 0.7726 | 3.7167 |
|        |             | <i>g_Escherichia.s_Escherichia_coli</i>             | 0.7344 | 0.6024 | 0      |
|        |             | <i>g_Klebsiella.s_Klebsiella_pneumoniae</i>         | 0      | 0.1704 | 0      |
|        |             | K04073unclassified                                  | 0      | 0      | 3.7167 |
| K13788 | pta         | K13788                                              | 0      | 0.6208 | 4.1293 |
|        |             | <i>g_Klebsiella.s_Klebsiella_pneumoniae</i>         | 0      | 0.252  | 0      |
|        |             | K13788unclassified                                  | 0      | 0.369  | 4.1293 |
| K01676 | E4.2.1.2A   | K01676                                              | 1.4096 | 2.3168 | 1.3107 |
|        |             | <i>g_Alistipes.s_Alistipes_shahii</i>               | 0      | 0.4406 | 0.2952 |
|        |             | <i>g_Escherichia.s_Escherichia_coli</i>             | 1.2664 | 1.2274 | 0.1185 |
|        |             | <i>g_Klebsiella.s_Klebsiella_pneumoniae</i>         | 0      | 0.4644 | 0      |
|        |             | K01676unclassified                                  | 0.1432 | 0.1844 | 0.8968 |
| K17741 | GRE2        | K17741                                              | 2.611  | 1.6146 | 0.7183 |
|        |             | <i>g_Debaryomyces.s_Debaryomyces_hansenii</i>       | 2.611  | 1.6146 | 0.7183 |
| K00246 | frdC        | K00246                                              | 1.2454 | 1.6354 | 0      |
|        |             | <i>g_Escherichia.s_Escherichia_coli</i>             | 0.3492 | 1.4942 | 0      |
|        |             | <i>g_Klebsiella.s_Klebsiella_pneumoniae</i>         | 0      | 0.1414 | 0      |
|        |             | <i>g_Proteus.s_Proteus_mirabilis</i>                | 0.1208 | 0      | 0      |
|        |             | K00246unclassified                                  | 0.7754 | 0      | 0      |
| K00247 | frdD        | K00247                                              | 0.7162 | 1.378  | 0.142  |
|        |             | <i>g_Escherichia.s_Escherichia_coli</i>             | 0.7162 | 1.378  | 0.142  |
| K12972 | ghrA        | K12972                                              | 0.9546 | 1.233  | 0.0337 |
|        |             | <i>g_Escherichia.s_Escherichia_coli</i>             | 0.9546 | 0.4228 | 0.0337 |
|        |             | <i>g_Klebsiella.s_Klebsiella_pneumoniae</i>         | 0      | 0.8102 | 0      |
| K00169 | porA        | K00169                                              | 1.3208 | 0.6024 | 0      |
|        |             | K00169unclassified                                  | 1.3208 | 0.6024 | 0      |

|        |                       |                                                |        |        |        |
|--------|-----------------------|------------------------------------------------|--------|--------|--------|
| K00090 | ghrB                  | K00090                                         | 0.689  | 0.8118 | 0      |
|        |                       | g_Escherichia.s_Escherichia_coli               | 0.542  | 0.5666 | 0      |
|        |                       | g_Klebsiella.s_Klebsiella_pneumoniae           | 0      | 0.2022 | 0      |
|        |                       | g_Proteus.s_Proteus_mirabilis                  | 0.1472 | 0.043  | 0      |
| K04020 | eutD                  | K04020                                         | 0.8328 | 0.6658 | 0      |
|        |                       | g_Escherichia.s_Escherichia_coli               | 0.8328 | 0.3742 | 0      |
|        |                       | g_Klebsiella.s_Klebsiella_pneumoniae           | 0      | 0.2918 | 0      |
| K00171 | porD                  | K00171                                         | 0.5288 | 0.1202 | 0.4772 |
|        |                       | K00171unclassified                             | 0.5288 | 0.1202 | 0.4772 |
| K04021 | eutE                  | K04021                                         | 0.5902 | 0.4782 | 0.0238 |
|        |                       | g_Escherichia.s_Escherichia_coli               | 0.5902 | 0.4782 | 0.0238 |
| K00029 | E1.1.1.40,            | K00029                                         | 0      | 0.7674 | 0.0533 |
|        |                       | g_Alistipes.s_Alistipes_shahii                 | 0      | 0.5512 | 0.0533 |
|        |                       | g_Klebsiella.s_Klebsiella_pneumoniae           | 0      | 0.2162 | 0      |
| K03777 | dld                   | K03777                                         | 0.467  | 0.2752 | 0.034  |
|        |                       | g_Corynebacterium.s_Corynebacterium_glutamicum | 0.0226 | 0      | 0      |
|        |                       | g_Escherichia.s_Escherichia_coli               | 0.4444 | 0.2568 | 0.034  |
|        |                       | g_Proteus.s_Proteus_mirabilis                  | 0      | 0.0184 | 0      |
| K07248 | aldA                  | K07248                                         | 0.2828 | 0.204  | 0      |
|        |                       | g_Escherichia.s_Escherichia_coli               | 0.2828 | 0.204  | 0      |
| K01026 | pct                   | K01026                                         | 0      | 0.387  | 0      |
|        |                       | K01026unclassified                             | 0      | 0.387  | 0      |
| K05523 | hchA                  | K05523                                         | 0.165  | 0.19   | 0      |
|        |                       | g_Escherichia.s_Escherichia_coli               | 0.165  | 0.19   | 0      |
| K15024 | K15024                | K15024                                         | 0      | 0.132  | 0      |
|        |                       | K15024unclassified                             | 0      | 0.132  | 0      |
| K01624 | FBA, fba <sup>A</sup> | K01624                                         | 71.355 | 64.611 | 99.908 |
|        |                       | g_Alistipes.s_Alistipes_finegoldii             | 0      | 0.1316 | 0.0323 |
|        |                       | g_Alistipes.s_Alistipes_shahii                 | 0      | 0.5048 | 0.1717 |
|        |                       | g_Bacteroides.s_Bacteroides_thetaiotaomicron   | 9.9202 | 13.743 | 19.302 |
|        |                       | g_Corynebacterium.s_Corynebacterium_glutamicum | 0.0402 | 1.5246 | 2.332  |
|        |                       | g_Deбaryomyces.s_Deбaryomyces_hansenii         | 3.6544 | 2.1936 | 0.8755 |
|        |                       | g_Escherichia.s_Escherichia_coli               | 0.3402 | 0.2892 | 0      |
|        |                       | g_Klebsiella.s_Klebsiella_pneumoniae           | 0      | 0.5458 | 0      |
|        |                       | g_Lactobacillus.s_Lactobacillus_delbrueckii    | 0.2224 | 0.1144 | 0.1045 |
|        |                       | g_Lactobacillus.s_Lactobacillus_helveticus     | 0.039  | 0.0458 | 0      |
|        |                       | g_Lactobacillus.s_Lactobacillus_reuteri        | 8.1238 | 1.2318 | 5.6717 |
|        |                       | g_Lactococcus.s_Lactococcus_lactis             | 0.7324 | 0.8178 | 0.8542 |
|        |                       | g_Lactococcus.s_Lactococcus_raffinolactis      | 0.0522 | 0.186  | 0.0363 |
|        |                       | g_Staphylococcus.s_Staphylococcus_xylosus      | 0.931  | 0.5946 | 0.4825 |
|        |                       | g_Streptococcus.s_Streptococcus_thermophilus   | 0.6196 | 0.995  | 0.7852 |
|        |                       | K01624unclassified                             | 46.68  | 41.694 | 69.26  |
| K00850 | pfkA, PFK             | K00850                                         | 76.384 | 65.33  | 86.752 |
|        |                       | g_Alistipes.s_Alistipes_shahii                 | 0      | 0.5754 | 0.511  |
|        |                       | g_Bacteroides.s_Bacteroides_thetaiotaomicron   | 12.67  | 17.96  | 23.189 |
|        |                       | g_Bacteroides.s_Bacteroides_uniformis          | 0      | 8.2692 | 0      |
|        |                       | g_Deбaryomyces.s_Deбaryomyces_hansenii         | 2.5158 | 2.2884 | 0.9085 |
|        |                       | g_Enterococcus.s_Enterococcus_faecalis         | 0      | 0      | 0.098  |
|        |                       | g_Escherichia.s_Escherichia_coli               | 0.7396 | 0.6218 | 0.0327 |
|        |                       | g_Lactobacillus.s_Lactobacillus_delbrueckii    | 0.2906 | 0.2456 | 0.0807 |
|        |                       | g_Lactobacillus.s_Lactobacillus_helveticus     | 0.106  | 0.0794 | 0      |
|        |                       | g_Lactobacillus.s_Lactobacillus_johnsonii      | 22.636 | 3.8092 | 13.481 |
|        |                       | g_Lactobacillus.s_Lactobacillus_murinus        | 1.9494 | 2.0608 | 0.7917 |
|        |                       | g_Lactococcus.s_Lactococcus_lactis             | 0.4936 | 0.5864 | 0.6487 |
|        |                       | g_Proteus.s_Proteus_mirabilis                  | 0.072  | 0.1116 | 0      |
|        |                       | g_Staphylococcus.s_Staphylococcus_xylosus      | 1.002  | 0.5224 | 0.5522 |
|        |                       | g_Streptococcus.s_Streptococcus_thermophilus   | 0.3052 | 0.5484 | 0.3445 |
|        |                       | K00850unclassified                             | 33.604 | 27.651 | 46.114 |

|        |             |                                                  |        |        |        |
|--------|-------------|--------------------------------------------------|--------|--------|--------|
| K01810 | GPI, pgi    | K01810                                           | 63.816 | 54.236 | 86.045 |
|        |             | g_Alistipes.s_Alistipes_shahii                   | 0      | 0.6618 | 0.2498 |
|        |             | g_Bacteroides.s_Bacteroides_thetaiotaomicron     | 7.5468 | 11.099 | 12.073 |
|        |             | g_Bacteroides.s_Bacteroides_uniformis            | 0      | 5.4874 | 0      |
|        |             | g_Corynebacterium.s_Corynebacterium_glutamicum   | 0.0242 | 1.2746 | 1.868  |
|        |             | g_Debaryomyces.s_Debaryomyces_hansenii           | 3.253  | 2.2362 | 0.632  |
|        |             | g_Enterococcus.s_Enterococcus_faecalis           | 0      | 0.0308 | 0.0222 |
|        |             | g_Escherichia.s_Escherichia_coli                 | 0.7812 | 0.595  | 0.0783 |
|        |             | g_Lactobacillus.s_Lactobacillus_delbrueckii      | 0.1404 | 0.1488 | 0.1422 |
|        |             | g_Lactobacillus.s_Lactobacillus_helveticus       | 0.0796 | 0      | 0.0252 |
|        |             | g_Lactobacillus.s_Lactobacillus_johnsonii        | 21.924 | 3.9686 | 14.671 |
|        |             | g_Lactobacillus.s_Lactobacillus_reuteri          | 7.2986 | 0.8022 | 4.671  |
|        |             | g_Lactococcus.s_Lactococcus_lactis               | 0.7638 | 0.5616 | 0.8135 |
|        |             | g_Leuconostoc.s_Leuconostoc_mesenteroides        | 0.1478 | 0.1178 | 0.3165 |
|        |             | g_Meyerozyma.s_Meyerozyma_guilliermondii         | 0.0198 | 0      | 0      |
|        |             | g_Parabacteroides.s_Parabacteroides_goldsteinii  | 2.869  | 2.7772 | 6.0492 |
|        |             | g_Proteus.s_Proteus_mirabilis                    | 0      | 0.0418 | 0      |
|        |             | g_Staphylococcus.s_Staphylococcus_lentus         | 1.001  | 0.2066 | 0.939  |
|        |             | g_Staphylococcus.s_Staphylococcus_xylosus        | 0.717  | 0.7224 | 0.3798 |
|        |             | g_Streptococcus.s_Streptococcus_thermophilus     | 0.3926 | 0.2696 | 0.74   |
|        |             | K01810unclassified                               | 16.857 | 23.235 | 42.375 |
| K00948 | PRPS, prs   | K00948                                           | 59.812 | 48.361 | 68.815 |
|        |             | g_Alistipes.s_Alistipes_shahii                   | 0      | 0.3406 | 0.1468 |
|        |             | g_Bifidobacterium.s_Bifidobacterium_pseudolongum | 0.2116 | 0.1836 | 1.8042 |
|        |             | g_Corynebacterium.s_Corynebacterium_glutamicum   | 0.1288 | 1.3056 | 1.8942 |
|        |             | g_Debaryomyces.s_Debaryomyces_hansenii           | 11.885 | 8.8564 | 3.4377 |
|        |             | g_Enterococcus.s_Enterococcus_faecalis           | 0      | 0.1292 | 0.0635 |
|        |             | g_Enterorhabdus.s_Enterorhabdus_caecimuris       | 1.1066 | 2.5362 | 3.1507 |
|        |             | g_Escherichia.s_Escherichia_coli                 | 0.369  | 0.3148 | 0      |
|        |             | g_Klebsiella.s_Klebsiella_pneumoniae             | 0      | 0.315  | 0      |
|        |             | g_Lactobacillus.s_Lactobacillus_delbrueckii      | 0.7484 | 1.088  | 0.3495 |
|        |             | g_Lactobacillus.s_Lactobacillus_helveticus       | 0.1256 | 0.4504 | 0.0317 |
|        |             | g_Lactobacillus.s_Lactobacillus_reuteri          | 16.221 | 2.6754 | 9.481  |
|        |             | g_Lactococcus.s_Lactococcus_lactis               | 1.3166 | 1.6254 | 1.173  |
|        |             | g_Leuconostoc.s_Leuconostoc_lactis               | 0      | 0      | 0.251  |
|        |             | g_Leuconostoc.s_Leuconostoc_mesenteroides        | 0.034  | 0.5618 | 0.2205 |
|        |             | g_Meyerozyma.s_Meyerozyma_guilliermondii         | 0.0234 | 0      | 0      |
|        |             | g_Proteus.s_Proteus_mirabilis                    | 0.0374 | 0      | 0      |
|        |             | g_Staphylococcus.s_Staphylococcus_xylosus        | 0.8498 | 1.2142 | 0.3612 |
|        |             | K00948unclassified                               | 26.754 | 26.765 | 46.45  |
| K00615 | E2.2.1.1, t | K00615                                           | 53.803 | 46.726 | 70.515 |
|        |             | g_Aerococcus.s_Aerococcus_viridans               | 0.0384 | 0.995  | 1.3562 |
|        |             | g_Alistipes.s_Alistipes_shahii                   | 0      | 0.5298 | 0.2545 |
|        |             | g_Bacteroides.s_Bacteroides_thetaiotaomicron     | 7.6594 | 10.441 | 10.115 |
|        |             | g_Blautia.s_Ruminococcus_torques                 | 0      | 0      | 0.0752 |
|        |             | g_Enterococcus.s_Enterococcus_faecalis           | 0      | 0.0858 | 0      |
|        |             | g_Klebsiella.s_Klebsiella_pneumoniae             | 0      | 1.1932 | 0      |
|        |             | g_Lactobacillus.s_Lactobacillus_johnsonii        | 17.008 | 3.4566 | 24.271 |
|        |             | g_Lactococcus.s_Lactococcus_lactis               | 0.4252 | 0.7948 | 0.6787 |
|        |             | g_Lactococcus.s_Lactococcus_raffinolactis        | 0.02   | 0      | 0.0605 |
|        |             | g_Staphylococcus.s_Staphylococcus_xylosus        | 0.9158 | 0.5726 | 0.5813 |
|        |             | K00615unclassified                               | 27.736 | 28.658 | 33.124 |
| K00852 | rbsK, RBf   | K00852                                           | 60.918 | 35.134 | 60.395 |
|        |             | g_Bacteroides.s_Bacteroides_thetaiotaomicron     | 15.167 | 18.685 | 22.23  |
|        |             | g_Debaryomyces.s_Debaryomyces_hansenii           | 2.934  | 1.8148 | 1.077  |
|        |             | g_Escherichia.s_Escherichia_coli                 | 0.9068 | 0.7814 | 0.034  |
|        |             | g_Klebsiella.s_Klebsiella_pneumoniae             | 0      | 0.7386 | 0      |
|        |             | g_Lactobacillus.s_Lactobacillus_delbrueckii      | 0.401  | 0.5512 | 0.1493 |

|        |             |                                                  |        |        |        |
|--------|-------------|--------------------------------------------------|--------|--------|--------|
|        |             | g_Lactobacillus.s_Lactobacillus_johnsonii        | 20.562 | 3.4382 | 14.065 |
|        |             | g_Lactobacillus.s_Lactobacillus_reuteri          | 16.278 | 2.3256 | 7.659  |
|        |             | g_Lactococcus.s_Lactococcus_lactis               | 0.6094 | 0.5216 | 1.0727 |
|        |             | g_Proteus.s_Proteus_mirabilis                    | 0.116  | 0.3434 | 0      |
|        |             | K00852unclassified                               | 3.9432 | 5.9334 | 14.108 |
| K00616 | E2.2.1.2, t | K00616                                           | 39.163 | 44.312 | 58.932 |
|        |             | g_Alistipes.s_Alistipes_finegoldii               | 0      | 0.7384 | 0.2223 |
|        |             | g_Bacteroides.s_Bacteroides_thetaiotaomicron     | 7.3892 | 7.0448 | 10.433 |
|        |             | g_Bifidobacterium.s_Bifidobacterium_pseudolongum | 0.1486 | 0.1932 | 0.6875 |
|        |             | g_Corynebacterium.s_Corynebacterium_glutamicum   | 0.0762 | 1.1666 | 2.3693 |
|        |             | g_Deбaryomyces.s_Deбaryomyces_hansenii           | 3.491  | 2.1564 | 0.662  |
|        |             | g_Enterorhabdus.s_Enterorhabdus_caecimuris       | 3.1086 | 8.9542 | 7.4335 |
|        |             | g_Escherichia.s_Escherichia_coli                 | 1.5698 | 1.0274 | 0.1428 |
|        |             | g_Klebsiella.s_Klebsiella_pneumoniae             | 0      | 0.8928 | 0      |
|        |             | g_Parabacteroides.s_Parabacteroides_goldsteinii  | 2.7488 | 3.2014 | 6.9867 |
|        |             | K00616unclassified                               | 20.63  | 18.937 | 29.994 |
| K00874 | kdgK        | K00874                                           | 41.261 | 34.796 | 64.464 |
|        |             | g_Alistipes.s_Alistipes_shahii                   | 0      | 0.6398 | 0.0667 |
|        |             | g_Escherichia.s_Escherichia_coli                 | 0.8868 | 0.584  | 0.068  |
|        |             | g_Klebsiella.s_Klebsiella_pneumoniae             | 0      | 0.355  | 0      |
|        |             | g_Lactococcus.s_Lactococcus_lactis               | 0.843  | 0.4494 | 0.8565 |
|        |             | g_Leuconostoc.s_Leuconostoc_mesenteroides        | 0.0874 | 0.2022 | 0.1013 |
|        |             | g_Proteus.s_Proteus_mirabilis                    | 0.034  | 0      | 0      |
|        |             | K00874unclassified                               | 39.41  | 32.565 | 63.372 |
| K01835 | pgm         | K01835                                           | 42.661 | 45.206 | 52.53  |
|        |             | g_Aerococcus.s_Aerococcus_viridans               | 0.0226 | 1.2674 | 0.8535 |
|        |             | g_Alistipes.s_Alistipes_shahii                   | 0      | 0.5396 | 0.2572 |
|        |             | g_Bacteroides.s_Bacteroides_thetaiotaomicron     | 6.4688 | 9.7104 | 9.8247 |
|        |             | g_Bacteroides.s_Bacteroides_uniformis            | 0      | 4.455  | 0      |
|        |             | g_Bifidobacterium.s_Bifidobacterium_pseudolongum | 0.1722 | 0.0666 | 1.1363 |
|        |             | g_Corynebacterium.s_Corynebacterium_glutamicum   | 0.1462 | 1.3018 | 1.773  |
|        |             | g_Deбaryomyces.s_Deбaryomyces_hansenii           | 5.6148 | 3.717  | 1.8298 |
|        |             | g_Enterococcus.s_Enterococcus_faecalis           | 0.019  | 0      | 0.0168 |
|        |             | g_Escherichia.s_Escherichia_coli                 | 0.3926 | 0.2796 | 0      |
|        |             | g_Klebsiella.s_Klebsiella_pneumoniae             | 0      | 0.4152 | 0      |
|        |             | g_Lactobacillus.s_Lactobacillus_delbrueckii      | 0.3086 | 0.4444 | 0.2442 |
|        |             | g_Lactobacillus.s_Lactobacillus_reuteri          | 7.9652 | 1.576  | 4.6575 |
|        |             | g_Meyerozyma.s_Meyerozyma_guilliermondii         | 0.0356 | 0      | 0      |
|        |             | g_Proteus.s_Proteus_mirabilis                    | 0.0798 | 0.0866 | 0      |
|        |             | g_Staphylococcus.s_Staphylococcus_xylosum        | 0.4054 | 0.072  | 0.1727 |
|        |             | K01835unclassified                               | 21.031 | 21.274 | 31.764 |
| K01619 | deoC, DEIK  | K01619                                           | 49.041 | 37.906 | 45.946 |
|        |             | g_Alistipes.s_Alistipes_shahii                   | 0      | 0.572  | 0.1595 |
|        |             | g_Bacteroides.s_Bacteroides_thetaiotaomicron     | 14.516 | 21.652 | 18.493 |
|        |             | g_Corynebacterium.s_Corynebacterium_glutamicum   | 0.2154 | 1.543  | 2.5635 |
|        |             | g_Enterococcus.s_Enterococcus_faecalis           | 0      | 0.144  | 0      |
|        |             | g_Escherichia.s_Escherichia_coli                 | 1.0094 | 0.5062 | 0.098  |
|        |             | g_Klebsiella.s_Klebsiella_pneumoniae             | 0      | 1.1572 | 0      |
|        |             | g_Lactobacillus.s_Lactobacillus_helveticus       | 0.0634 | 0      | 0.0542 |
|        |             | g_Lactobacillus.s_Lactobacillus_johnsonii        | 18.166 | 3.1112 | 9.3235 |
|        |             | g_Lactobacillus.s_Lactobacillus_reuteri          | 8.9976 | 1.2088 | 4.842  |
|        |             | g_Lactococcus.s_Lactococcus_lactis               | 0.5434 | 0.6924 | 0.5155 |
|        |             | g_Lactococcus.s_Lactococcus_raffinolactis        | 0      | 0      | 0.0588 |
|        |             | K01619unclassified                               | 5.5296 | 7.3194 | 9.8383 |
| K00036 | G6PD, zw    | K00036                                           | 42.137 | 23.21  | 43.828 |
|        |             | g_Aerococcus.s_Aerococcus_viridans               | 0      | 0.9268 | 0.8667 |
|        |             | g_Bacteroides.s_Bacteroides_thetaiotaomicron     | 4.664  | 7.0032 | 7.0918 |
|        |             | g_Bifidobacterium.s_Bifidobacterium_pseudolongum | 0.0816 | 0.0606 | 0.569  |



|        |      |                                                       |        |        |        |
|--------|------|-------------------------------------------------------|--------|--------|--------|
|        |      | <i>g_Corynebacterium.s_Corynebacterium_glutamicum</i> | 0.1612 | 1.4986 | 1.8255 |
|        |      | K21071unclassified                                    | 13.952 | 14.09  | 27.901 |
| K01808 | rpiB | K01808                                                | 23.345 | 25.675 | 37.867 |
|        |      | <i>g_Alistipes.s_Alistipes_shahii</i>                 | 0      | 0.3902 | 0.1015 |
|        |      | <i>g_Bacteroides.s_Bacteroides_thetaiotaomicron</i>   | 9.2556 | 12.057 | 12.81  |
|        |      | <i>g_Corynebacterium.s_Corynebacterium_glutamicum</i> | 0.1094 | 1.6112 | 2.9448 |
|        |      | <i>g_Debaryomyces.s_Debaryomyces_hansenii</i>         | 3.0362 | 1.8414 | 0.3422 |
|        |      | <i>g_Escherichia.s_Escherichia_coli</i>               | 0.9866 | 0.614  | 0      |
|        |      | <i>g_Klebsiella.s_Klebsiella_pneumoniae</i>           | 0      | 0.5598 | 0      |
|        |      | <i>g_Lactobacillus.s_Lactobacillus_delbrueckii</i>    | 0.3106 | 0.448  | 0      |
|        |      | <i>g_Lactococcus.s_Lactococcus_lactis</i>             | 0      | 0.1844 | 0      |
|        |      | K01808unclassified                                    | 9.6468 | 7.9702 | 21.669 |
| K01807 | rpiA | K01807                                                | 38.423 | 10.418 | 26.217 |
|        |      | <i>g_Aerococcus.s_Aerococcus_viridans</i>             | 0      | 0.764  | 2.3257 |
|        |      | <i>g_Debaryomyces.s_Debaryomyces_hansenii</i>         | 3.4732 | 1.602  | 1.2947 |
|        |      | <i>g_Enterococcus.s_Enterococcus_faecalis</i>         | 0      | 0.1914 | 0.05   |
|        |      | <i>g_Escherichia.s_Escherichia_coli</i>               | 0.4768 | 0.4624 | 0      |
|        |      | <i>g_Klebsiella.s_Klebsiella_pneumoniae</i>           | 0      | 0.4846 | 0      |
|        |      | <i>g_Lactobacillus.s_Lactobacillus_delbrueckii</i>    | 0.0548 | 0.4522 | 0.0488 |
|        |      | <i>g_Lactobacillus.s_Lactobacillus_helveticus</i>     | 0.0704 | 0      | 0      |
|        |      | <i>g_Lactobacillus.s_Lactobacillus_johnsonii</i>      | 22.674 | 2.8656 | 16.038 |
|        |      | <i>g_Lactobacillus.s_Lactobacillus_reuteri</i>        | 9.4002 | 1.5512 | 2.7868 |
|        |      | <i>g_Lactococcus.s_Lactococcus_lactis</i>             | 0.667  | 0.9534 | 0.3318 |
|        |      | <i>g_Lactococcus.s_Lactococcus_raffinolactis</i>      | 0.1258 | 0.1256 | 0      |
|        |      | <i>g_Leuconostoc.s_Leuconostoc_mesenteroides</i>      | 0.5572 | 0.5408 | 0.8158 |
|        |      | <i>g_Streptococcus.s_Streptococcus_thermophilus</i>   | 0.6874 | 0.4244 | 0.7493 |
|        |      | K01807unclassified                                    | 0.2368 | 0      | 1.7755 |
| K11645 | fbA  | K11645                                                | 12.401 | 29.494 | 27.211 |
|        |      | <i>g_Alistipes.s_Alistipes_shahii</i>                 | 0      | 0.3114 | 0.1618 |
|        |      | <i>g_Bacteroides.s_Bacteroides_thetaiotaomicron</i>   | 5.6224 | 7.5208 | 9.1868 |
|        |      | <i>g_Enterorhabdus.s_Enterorhabdus_caecimuris</i>     | 3.6964 | 13.415 | 10.305 |
|        |      | <i>g_Escherichia.s_Escherichia_coli</i>               | 0.7352 | 0.5274 | 0.0588 |
|        |      | <i>g_Klebsiella.s_Klebsiella_pneumoniae</i>           | 0      | 0.7008 | 0      |
|        |      | <i>g_Proteus.s_Proteus_mirabilis</i>                  | 0      | 0.0946 | 0      |
|        |      | K11645unclassified                                    | 2.3462 | 6.9238 | 7.4983 |
| K01839 | deoB | K01839                                                | 17.411 | 7.621  | 12.985 |
|        |      | <i>g_Enterococcus.s_Enterococcus_faecalis</i>         | 0      | 0.0636 | 0      |
|        |      | <i>g_Escherichia.s_Escherichia_coli</i>               | 0.651  | 0.517  | 0.0767 |
|        |      | <i>g_Klebsiella.s_Klebsiella_pneumoniae</i>           | 0      | 0.4004 | 0      |
|        |      | <i>g_Lactobacillus.s_Lactobacillus_reuteri</i>        | 10.204 | 1.0584 | 4.7988 |
|        |      | <i>g_Lactococcus.s_Lactococcus_lactis</i>             | 0.5892 | 0.7638 | 0.6857 |
|        |      | <i>g_Lactococcus.s_Lactococcus_raffinolactis</i>      | 0      | 0.0326 | 0      |
|        |      | <i>g_Proteus.s_Proteus_mirabilis</i>                  | 0      | 0.0276 | 0      |
|        |      | <i>g_Staphylococcus.s_Staphylococcus_lentus</i>       | 0.7226 | 0.129  | 1.3293 |
|        |      | <i>g_Staphylococcus.s_Staphylococcus_xylosus</i>      | 0.279  | 0.2314 | 0.1133 |
|        |      | <i>g_Streptococcus.s_Streptococcus_thermophilus</i>   | 0.4294 | 0.3672 | 0.2563 |
|        |      | K01839unclassified                                    | 4.5364 | 4.0298 | 5.725  |
| K04041 | fbp3 | K04041                                                | 8.6184 | 10.539 | 17.74  |
|        |      | <i>g_Enterococcus.s_Enterococcus_faecalis</i>         | 0.0518 | 0.1834 | 0      |
|        |      | <i>g_Lactococcus.s_Lactococcus_lactis</i>             | 0.7366 | 0.713  | 0.6677 |
|        |      | <i>g_Staphylococcus.s_Staphylococcus_lentus</i>       | 0.603  | 0.419  | 1.1113 |
|        |      | K04041unclassified                                    | 7.2272 | 9.2236 | 15.96  |
| K01625 | eda  | K01625                                                | 4.497  | 2.3494 | 12.059 |
|        |      | <i>g_Escherichia.s_Escherichia_coli</i>               | 0.0572 | 0.2106 | 0.054  |
|        |      | <i>g_Klebsiella.s_Klebsiella_pneumoniae</i>           | 0      | 0.3522 | 0      |
|        |      | <i>g_Lactococcus.s_Lactococcus_lactis</i>             | 0.0606 | 0.2098 | 0.1158 |
|        |      | <i>g_Proteus.s_Proteus_mirabilis</i>                  | 0.121  | 0      | 0      |
|        |      | K01625unclassified                                    | 4.2584 | 1.577  | 11.889 |

|        |            |                                                |        |        |        |
|--------|------------|------------------------------------------------|--------|--------|--------|
| K01057 | PGLS, pgl  | K01057                                         | 5.7072 | 3.8206 | 5.7947 |
|        |            | g_Debaryomyces.s_Debaryomyces_hansenii         | 5.7072 | 3.382  | 1.888  |
|        |            | K01057unclassified                             | 0      | 0.4386 | 3.9067 |
| K07404 | pgl        | K07404                                         | 6.9794 | 2.7562 | 4.875  |
|        |            | g_Enterococcus.s_Enterococcus_faecalis         | 0.0338 | 0.0786 | 0      |
|        |            | g_Escherichia.s_Escherichia_coli               | 0.4408 | 0.3808 | 0.0345 |
|        |            | g_Klebsiella.s_Klebsiella_pneumoniae           | 0      | 0.1194 | 0      |
|        |            | g_Lactobacillus.s_Lactobacillus_helveticus     | 0.087  | 0.187  | 0.0642 |
|        |            | g_Lactobacillus.s_Lactobacillus_reuteri        | 5.4926 | 1.0498 | 3.775  |
|        |            | g_Lactococcus.s_Lactococcus_lactis             | 0.8894 | 0.9048 | 1.0013 |
|        |            | g_Proteus.s_Proteus_mirabilis                  | 0.0354 | 0.0354 | 0      |
| K02446 | glpX       | K02446                                         | 2.0784 | 3.5136 | 5.7693 |
|        |            | g_Corynebacterium.s_Corynebacterium_glutamicum | 0.086  | 1.3112 | 1.7555 |
|        |            | g_Escherichia.s_Escherichia_coli               | 1.6978 | 0.9946 | 0.1693 |
|        |            | g_Klebsiella.s_Klebsiella_pneumoniae           | 0      | 0.4658 | 0      |
|        |            | K02446unclassified                             | 0.2946 | 0.742  | 3.8445 |
| K03841 | FBP, fbp   | K03841                                         | 3.2946 | 3.3838 | 1.962  |
|        |            | g_Debaryomyces.s_Debaryomyces_hansenii         | 2.6468 | 1.9308 | 1.3525 |
|        |            | g_Escherichia.s_Escherichia_coli               | 0.613  | 0.5756 | 0      |
|        |            | g_Klebsiella.s_Klebsiella_pneumoniae           | 0      | 0.8018 | 0      |
|        |            | g_Proteus.s_Proteus_mirabilis                  | 0.0348 | 0.0752 | 0      |
|        |            | K03841unclassified                             | 0      | 0      | 0.6095 |
| K00895 | pfp, PFP   | K00895                                         | 0.7372 | 1.6748 | 2.925  |
|        |            | K00895unclassified                             | 0.7372 | 1.6748 | 2.925  |
| K01623 | ALDO       | K01623                                         | 0.726  | 1.7768 | 2.368  |
|        |            | g_Aerococcus.s_Aerococcus_viridans             | 0      | 1.0984 | 1.9128 |
|        |            | g_Staphylococcus.s_Staphylococcus_xylosus      | 0.726  | 0.6784 | 0.4552 |
| K08093 | hxlA       | K08093                                         | 1.7042 | 0.9576 | 0.762  |
|        |            | g_Staphylococcus.s_Staphylococcus_xylosus      | 1.3416 | 0.9576 | 0.762  |
|        |            | K08093unclassified                             | 0.3624 | 0      | 0      |
| K05774 | phnN       | K05774                                         | 1.1406 | 1.6146 | 0.065  |
|        |            | g_Escherichia.s_Escherichia_coli               | 1.1406 | 1.4368 | 0.065  |
|        |            | g_Klebsiella.s_Klebsiella_pneumoniae           | 0      | 0.1778 | 0      |
| K01621 | xfp, xpk   | K01621                                         | 0.6404 | 0.8418 | 0.3633 |
|        |            | g_Lactobacillus.s_Lactobacillus_delbrueckii    | 0.1588 | 0.4134 | 0      |
|        |            | g_Lactococcus.s_Lactococcus_lactis             | 0.4814 | 0.4284 | 0.3633 |
| K17464 | PTS-Dga-   | K17464                                         | 0.38   | 1.3358 | 0      |
|        |            | g_Escherichia.s_Escherichia_coli               | 0.38   | 1.3358 | 0      |
| K00090 | ghrB       | K00090                                         | 0.689  | 0.8118 | 0      |
|        |            | g_Escherichia.s_Escherichia_coli               | 0.542  | 0.5666 | 0      |
|        |            | g_Klebsiella.s_Klebsiella_pneumoniae           | 0      | 0.2022 | 0      |
|        |            | g_Proteus.s_Proteus_mirabilis                  | 0.1472 | 0.043  | 0      |
| K17466 | PTS-Dga-   | K17466                                         | 0.967  | 0.3214 | 0      |
|        |            | g_Escherichia.s_Escherichia_coli               | 0.967  | 0.3214 | 0      |
| K00131 | gapN       | K00131                                         | 0.4324 | 0.4108 | 0.0942 |
|        |            | g_Lactobacillus.s_Lactobacillus_delbrueckii    | 0.4106 | 0.3838 | 0.0468 |
|        |            | g_Lactococcus.s_Lactococcus_raffinolactis      | 0.022  | 0.0272 | 0.0473 |
| K08094 | hxlB       | K08094                                         | 0.7366 | 0.1836 | 0      |
|        |            | g_Staphylococcus.s_Staphylococcus_xylosus      | 0.7366 | 0.1836 | 0      |
| K16370 | pfkB       | K16370                                         | 0.482  | 0.3224 | 0      |
|        |            | g_Escherichia.s_Escherichia_coli               | 0.482  | 0.3224 | 0      |
| K01690 | edd        | K01690                                         | 0.3174 | 0.4466 | 0      |
|        |            | g_Escherichia.s_Escherichia_coli               | 0.3174 | 0.1834 | 0      |
|        |            | g_Klebsiella.s_Klebsiella_pneumoniae           | 0      | 0.2632 | 0      |
| K17468 | dgaE       | K17468                                         | 0.2478 | 0.2246 | 0      |
|        |            | g_Escherichia.s_Escherichia_coli               | 0.2478 | 0.2246 | 0      |
| K06151 | E1.1.99.3/ | K06151                                         | 0      | 0.3788 | 0      |
|        |            | g_Klebsiella.s_Klebsiella_pneumoniae           | 0      | 0.3788 | 0      |



|        |           |                                                  |        |        |        |
|--------|-----------|--------------------------------------------------|--------|--------|--------|
| K00117 | ged       | K00117                                           | 0.0262 | 0.0596 | 0.0133 |
|        |           | g_Escherichia.s_Escherichia_coli                 | 0.0262 | 0.0596 | 0.0133 |
| K00134 | GAPDH, ξ  | K00134                                           | 116.45 | 99.412 | 138.17 |
|        |           | g_Aerococcus.s_Aerococcus_viridans               | 0      | 0.6716 | 1.3792 |
|        |           | g_Alistipes.s_Alistipes_shahii                   | 0      | 0.5228 | 0.2605 |
|        |           | g_Bifidobacterium.s_Bifidobacterium_pseudolongum | 0.0772 | 0.071  | 0.821  |
|        |           | g_Corynebacterium.s_Corynebacterium_glutamicum   | 0.0416 | 1.4388 | 2.0607 |
|        |           | g_Debaryomyces.s_Debaryomyces_hansenii           | 3.172  | 2.5974 | 0.9458 |
|        |           | g_Enterococcus.s_Enterococcus_faecalis           | 0      | 0.1472 | 0.0312 |
|        |           | g_Enterorhabdus.s_Enterorhabdus_caecimuris       | 2.9386 | 6.4544 | 5.8295 |
|        |           | g_Escherichia.s_Escherichia_coli                 | 0.9366 | 0.6724 | 0.1962 |
|        |           | g_Eubacterium.s_Eubacterium_plexicaudatum        | 0.7446 | 1.0958 | 0.4758 |
|        |           | g_Eubacterium.s_Eubacterium_sp_14_2              | 11.878 | 5.464  | 0      |
|        |           | g_Klebsiella.s_Klebsiella_pneumoniae             | 0      | 0.436  | 0      |
|        |           | g_Lactobacillus.s_Lactobacillus_delbrueckii      | 0.6128 | 0.3468 | 0      |
|        |           | g_Lactobacillus.s_Lactobacillus_helveticus       | 0.0754 | 0.0746 | 0.0657 |
|        |           | g_Lactobacillus.s_Lactobacillus_reuteri          | 8.1262 | 1.5582 | 4.6917 |
|        |           | g_Lactococcus.s_Lactococcus_lactis               | 1.6874 | 1.1442 | 1.2973 |
|        |           | g_Lactococcus.s_Lactococcus_raffinolactis        | 0.0768 | 0      | 0.0645 |
|        |           | g_Leuconostoc.s_Leuconostoc_lactis               | 0.0342 | 0      | 0      |
|        |           | g_Parabacteroides.s_Parabacteroides_goldsteinii  | 2.56   | 1.9412 | 5.0612 |
|        |           | g_Staphylococcus.s_Staphylococcus_xylosum        | 1.8544 | 1.1516 | 0.8488 |
|        |           | K00134unclassified                               | 81.634 | 73.624 | 114.14 |
| K01803 | TPI, tpiA | K01803                                           | 119.36 | 89.039 | 123.5  |
|        |           | g_Aerococcus.s_Aerococcus_viridans               | 0      | 0.7992 | 1.4818 |
|        |           | g_Alistipes.s_Alistipes_shahii                   | 0      | 0.437  | 0.2837 |
|        |           | g_Corynebacterium.s_Corynebacterium_glutamicum   | 0.117  | 1.1584 | 2.536  |
|        |           | g_Debaryomyces.s_Debaryomyces_hansenii           | 3.2064 | 2.5522 | 1.3693 |
|        |           | g_Enterococcus.s_Enterococcus_faecalis           | 0      | 0      | 0.0877 |
|        |           | g_Escherichia.s_Escherichia_coli                 | 0.893  | 1.3046 | 0.2217 |
|        |           | g_Klebsiella.s_Klebsiella_pneumoniae             | 0      | 1.3826 | 0      |
|        |           | g_Lactobacillus.s_Lactobacillus_delbrueckii      | 0.1746 | 0.3862 | 0.1645 |
|        |           | g_Lactobacillus.s_Lactobacillus_helveticus       | 0.1702 | 0.2608 | 0      |
|        |           | g_Lactobacillus.s_Lactobacillus_johnsonii        | 23.368 | 3.1208 | 14.652 |
|        |           | g_Lactobacillus.s_Lactobacillus_reuteri          | 16.864 | 3.574  | 8.692  |
|        |           | g_Lactococcus.s_Lactococcus_lactis               | 0.6298 | 0.8336 | 0.694  |
|        |           | g_Parabacteroides.s_Parabacteroides_goldsteinii  | 3.0124 | 2.4788 | 6.8562 |
|        |           | g_Staphylococcus.s_Staphylococcus_xylosum        | 0.4828 | 1.0626 | 0.4885 |
|        |           | g_Streptococcus.s_Streptococcus_thermophilus     | 0.2908 | 0.8014 | 0.4588 |
|        |           | K01803unclassified                               | 70.154 | 68.886 | 85.519 |
| K00927 | PGK, pgk  | K00927                                           | 104.67 | 92.638 | 101.81 |
|        |           | g_Aerococcus.s_Aerococcus_viridans               | 0.034  | 1.4142 | 1.0625 |
|        |           | g_Alistipes.s_Alistipes_finegoldii               | 0      | 0.0996 | 0      |
|        |           | g_Alistipes.s_Alistipes_shahii                   | 0      | 0.7442 | 0.2897 |
|        |           | g_Bacteroides.s_Bacteroides_thetaiotaomicron     | 10.749 | 14.979 | 18.296 |
|        |           | g_Bacteroides.s_Bacteroides_uniformis            | 0      | 5.3476 | 0      |
|        |           | g_Corynebacterium.s_Corynebacterium_glutamicum   | 0.0998 | 0.9196 | 1.8437 |
|        |           | g_Debaryomyces.s_Debaryomyces_hansenii           | 2.9584 | 1.7232 | 0.9713 |
|        |           | g_Escherichia.s_Escherichia_coli                 | 0.5252 | 0.7418 | 0.0885 |
|        |           | g_Klebsiella.s_Klebsiella_pneumoniae             | 0      | 0.5484 | 0      |
|        |           | g_Lactobacillus.s_Lactobacillus_delbrueckii      | 0.5312 | 0.4638 | 0.191  |
|        |           | g_Lactobacillus.s_Lactobacillus_helveticus       | 0.1592 | 0.158  | 0      |
|        |           | g_Lactobacillus.s_Lactobacillus_johnsonii        | 20.193 | 3.8202 | 15.321 |
|        |           | g_Lactobacillus.s_Lactobacillus_reuteri          | 7.6682 | 1.2934 | 5.1313 |
|        |           | g_Lactococcus.s_Lactococcus_lactis               | 0.694  | 0.6538 | 0.4162 |
|        |           | g_Leuconostoc.s_Leuconostoc_lactis               | 0      | 0      | 0.0248 |
|        |           | g_Leuconostoc.s_Leuconostoc_mesenteroides        | 0.3188 | 0.3728 | 0.3298 |
|        |           | g_Meyerozyma.s_Meyerozyma_guilliermondii         | 0.027  | 0      | 0      |

|        |                                                  |        |        |        |
|--------|--------------------------------------------------|--------|--------|--------|
|        | g_Proteus.s_Proteus_mirabilis                    | 0.0588 | 0.0294 | 0      |
|        | g_Staphylococcus.s_Staphylococcus_xylosus        | 0.78   | 0.622  | 0.3982 |
|        | g_Streptococcus.s_Streptococcus_thermophilus     | 0.2012 | 0.6178 | 0.3492 |
|        | K00927unclassified                               | 59.675 | 58.09  | 57.096 |
| K01834 | PGAM, gr K01834                                  | 101.72 | 45.549 | 98.922 |
|        | g_Alistipes.s_Alistipes_shahii                   | 0      | 0.3178 | 0.1503 |
|        | g_Bacteroides.s_Bacteroides_thetaiotaomicron     | 12.775 | 16.969 | 26.038 |
|        | g_Bacteroides.s_Bacteroides_uniformis            | 0      | 1.7704 | 0      |
|        | g_Corynebacterium.s_Corynebacterium_glutamicum   | 0.1976 | 1.3126 | 1.98   |
|        | g_Deбaryomyces.s_Deбaryomyces_hansenii           | 5.5856 | 4.8878 | 2.1175 |
|        | g_Enterococcus.s_Enterococcus_faecalis           | 0      | 0.0688 | 0.0495 |
|        | g_Escherichia.s_Escherichia_coli                 | 0.1946 | 0.172  | 0.1023 |
|        | g_Klebsiella.s_Klebsiella_pneumoniae             | 0      | 0.4018 | 0      |
|        | g_Lactobacillus.s_Lactobacillus_delbrueckii      | 0.4642 | 0.4816 | 0.1457 |
|        | g_Lactobacillus.s_Lactobacillus_helveticus       | 0.4062 | 0.177  | 0      |
|        | g_Lactobacillus.s_Lactobacillus_johnsonii        | 70.648 | 13.232 | 50.664 |
|        | g_Lactobacillus.s_Lactobacillus_reuteri          | 7.9706 | 1.7778 | 5.8267 |
|        | g_Lactococcus.s_Lactococcus_lactis               | 2.022  | 1.9884 | 1.3338 |
|        | g_Leuconostoc.s_Leuconostoc_lactis               | 0      | 0.1054 | 0      |
|        | g_Leuconostoc.s_Leuconostoc_mesenteroides        | 0.4222 | 0.0528 | 0.4203 |
|        | g_Staphylococcus.s_Staphylococcus_xylosus        | 1.0304 | 0.4448 | 0.535  |
|        | K01834unclassified                               | 0      | 1.3896 | 9.5588 |
| K00016 | LDH, ldh K00016                                  | 112.93 | 29.277 | 95.643 |
|        | g_Bifidobacterium.s_Bifidobacterium_pseudolongum | 0.0978 | 0.1072 | 0.7808 |
|        | g_Corynebacterium.s_Corynebacterium_glutamicum   | 0.1856 | 1.5554 | 2.5247 |
|        | g_Enterococcus.s_Enterococcus_faecalis           | 0      | 0.175  | 0.033  |
|        | g_Klebsiella.s_Klebsiella_pneumoniae             | 0      | 0.6078 | 0      |
|        | g_Lactobacillus.s_Lactobacillus_delbrueckii      | 0.9606 | 0.9334 | 0.2585 |
|        | g_Lactobacillus.s_Lactobacillus_helveticus       | 0.5816 | 0.326  | 0.2458 |
|        | g_Lactobacillus.s_Lactobacillus_johnsonii        | 64.978 | 12.267 | 49.18  |
|        | g_Lactobacillus.s_Lactobacillus_reuteri          | 40.309 | 7.153  | 24.038 |
|        | g_Lactococcus.s_Lactococcus_lactis               | 3.4188 | 3.0038 | 2.2945 |
|        | g_Staphylococcus.s_Staphylococcus_xylosus        | 0.3018 | 0.2656 | 0.1492 |
|        | g_Streptococcus.s_Streptococcus_thermophilus     | 0.6424 | 0.6768 | 0.4148 |
|        | K00016unclassified                               | 1.453  | 2.2064 | 15.723 |
| K01624 | FBA, fba <sup>A</sup> K01624                     | 71.355 | 64.611 | 99.908 |
|        | g_Alistipes.s_Alistipes_finegoldii               | 0      | 0.1316 | 0.0323 |
|        | g_Alistipes.s_Alistipes_shahii                   | 0      | 0.5048 | 0.1717 |
|        | g_Bacteroides.s_Bacteroides_thetaiotaomicron     | 9.9202 | 13.743 | 19.302 |
|        | g_Corynebacterium.s_Corynebacterium_glutamicum   | 0.0402 | 1.5246 | 2.332  |
|        | g_Deбaryomyces.s_Deбaryomyces_hansenii           | 3.6544 | 2.1936 | 0.8755 |
|        | g_Escherichia.s_Escherichia_coli                 | 0.3402 | 0.2892 | 0      |
|        | g_Klebsiella.s_Klebsiella_pneumoniae             | 0      | 0.5458 | 0      |
|        | g_Lactobacillus.s_Lactobacillus_delbrueckii      | 0.2224 | 0.1144 | 0.1045 |
|        | g_Lactobacillus.s_Lactobacillus_helveticus       | 0.039  | 0.0458 | 0      |
|        | g_Lactobacillus.s_Lactobacillus_reuteri          | 8.1238 | 1.2318 | 5.6717 |
|        | g_Lactococcus.s_Lactococcus_lactis               | 0.7324 | 0.8178 | 0.8542 |
|        | g_Lactococcus.s_Lactococcus_raffinolactis        | 0.0522 | 0.186  | 0.0363 |
|        | g_Staphylococcus.s_Staphylococcus_xylosus        | 0.931  | 0.5946 | 0.4825 |
|        | g_Streptococcus.s_Streptococcus_thermophilus     | 0.6196 | 0.995  | 0.7852 |
|        | K01624unclassified                               | 46.68  | 41.694 | 69.26  |
| K00850 | pfkA, PFKK00850                                  | 76.384 | 65.33  | 86.752 |
|        | g_Alistipes.s_Alistipes_shahii                   | 0      | 0.5754 | 0.511  |
|        | g_Bacteroides.s_Bacteroides_thetaiotaomicron     | 12.67  | 17.96  | 23.189 |
|        | g_Bacteroides.s_Bacteroides_uniformis            | 0      | 8.2692 | 0      |
|        | g_Deбaryomyces.s_Deбaryomyces_hansenii           | 2.5158 | 2.2884 | 0.9085 |
|        | g_Enterococcus.s_Enterococcus_faecalis           | 0      | 0      | 0.098  |
|        | g_Escherichia.s_Escherichia_coli                 | 0.7396 | 0.6218 | 0.0327 |

|        |                                                 |        |        |        |
|--------|-------------------------------------------------|--------|--------|--------|
|        | g_Lactobacillus.s_Lactobacillus_delbrueckii     | 0.2906 | 0.2456 | 0.0807 |
|        | g_Lactobacillus.s_Lactobacillus_helveticus      | 0.106  | 0.0794 | 0      |
|        | g_Lactobacillus.s_Lactobacillus_johnsonii       | 22.636 | 3.8092 | 13.481 |
|        | g_Lactobacillus.s_Lactobacillus_murinus         | 1.9494 | 2.0608 | 0.7917 |
|        | g_Lactococcus.s_Lactococcus_lactis              | 0.4936 | 0.5864 | 0.6487 |
|        | g_Proteus.s_Proteus_mirabilis                   | 0.072  | 0.1116 | 0      |
|        | g_Staphylococcus.s_Staphylococcus_xylosus       | 1.002  | 0.5224 | 0.5522 |
|        | g_Streptococcus.s_Streptococcus_thermophilus    | 0.3052 | 0.5484 | 0.3445 |
|        | K0085Unclassified                               | 33.604 | 27.651 | 46.114 |
| K01810 | GPI, pgi K01810                                 | 63.816 | 54.236 | 86.045 |
|        | g_Alistipes.s_Alistipes_shahii                  | 0      | 0.6618 | 0.2498 |
|        | g_Bacteroides.s_Bacteroides_thetaiotaomicron    | 7.5468 | 11.099 | 12.073 |
|        | g_Bacteroides.s_Bacteroides_uniformis           | 0      | 5.4874 | 0      |
|        | g_Corynebacterium.s_Corynebacterium_glutamicum  | 0.0242 | 1.2746 | 1.868  |
|        | g_Debaryomyces.s_Debaryomyces_hansenii          | 3.253  | 2.2362 | 0.632  |
|        | g_Enterococcus.s_Enterococcus_faecalis          | 0      | 0.0308 | 0.0222 |
|        | g_Escherichia.s_Escherichia_coli                | 0.7812 | 0.595  | 0.0783 |
|        | g_Lactobacillus.s_Lactobacillus_delbrueckii     | 0.1404 | 0.1488 | 0.1422 |
|        | g_Lactobacillus.s_Lactobacillus_helveticus      | 0.0796 | 0      | 0.0252 |
|        | g_Lactobacillus.s_Lactobacillus_johnsonii       | 21.924 | 3.9686 | 14.671 |
|        | g_Lactobacillus.s_Lactobacillus_reuteri         | 7.2986 | 0.8022 | 4.671  |
|        | g_Lactococcus.s_Lactococcus_lactis              | 0.7638 | 0.5616 | 0.8135 |
|        | g_Leuconostoc.s_Leuconostoc_mesenteroides       | 0.1478 | 0.1178 | 0.3165 |
|        | g_Meyerozyma.s_Meyerozyma_guilliermondii        | 0.0198 | 0      | 0      |
|        | g_Parabacteroides.s_Parabacteroides_goldsteinii | 2.869  | 2.7772 | 6.0492 |
|        | g_Proteus.s_Proteus_mirabilis                   | 0      | 0.0418 | 0      |
|        | g_Staphylococcus.s_Staphylococcus_lentus        | 1.001  | 0.2066 | 0.939  |
|        | g_Staphylococcus.s_Staphylococcus_xylosus       | 0.717  | 0.7224 | 0.3798 |
|        | g_Streptococcus.s_Streptococcus_thermophilus    | 0.3926 | 0.2696 | 0.74   |
|        | K01810Unclassified                              | 16.857 | 23.235 | 42.375 |
| K01785 | galM, GA:K01785                                 | 53.831 | 59.024 | 67.419 |
|        | g_Alistipes.s_Alistipes_shahii                  | 0      | 0.3994 | 0.1735 |
|        | g_Bacteroides.s_Bacteroides_thetaiotaomicron    | 34.095 | 44.93  | 49.274 |
|        | g_Debaryomyces.s_Debaryomyces_hansenii          | 5.4464 | 2.9546 | 1.7107 |
|        | g_Enterococcus.s_Enterococcus_faecalis          | 0.0336 | 0      | 0      |
|        | g_Escherichia.s_Escherichia_coli                | 1.8736 | 1.2534 | 0.0627 |
|        | g_Klebsiella.s_Klebsiella_pneumoniae            | 0      | 0.2502 | 0      |
|        | g_Lactobacillus.s_Lactobacillus_reuteri         | 5.9656 | 1.0702 | 4.4913 |
|        | g_Lactococcus.s_Lactococcus_lactis              | 1.029  | 0.656  | 1.266  |
|        | g_Leuconostoc.s_Leuconostoc_mesenteroides       | 0      | 0.0714 | 0.1002 |
|        | g_Meyerozyma.s_Meyerozyma_guilliermondii        | 0.0154 | 0      | 0      |
|        | g_Streptococcus.s_Streptococcus_thermophilus    | 0.1662 | 0.3804 | 0.1683 |
|        | K01785Unclassified                              | 5.2068 | 7.0588 | 10.172 |
| K15634 | gpmB K15634                                     | 89.157 | 22.287 | 60.743 |
|        | g_Corynebacterium.s_Corynebacterium_glutamicum  | 0      | 1.1438 | 1.6427 |
|        | g_Debaryomyces.s_Debaryomyces_hansenii          | 3.1198 | 2.1904 | 0.8638 |
|        | g_Enterococcus.s_Enterococcus_faecalis          | 0      | 0.0628 | 0.0473 |
|        | g_Escherichia.s_Escherichia_coli                | 0.5348 | 0.595  | 0      |
|        | g_Klebsiella.s_Klebsiella_pneumoniae            | 0      | 0.3204 | 0      |
|        | g_Lactobacillus.s_Lactobacillus_delbrueckii     | 1.1286 | 1.9976 | 0.4852 |
|        | g_Lactobacillus.s_Lactobacillus_helveticus      | 0.1366 | 0.355  | 0.0597 |
|        | g_Lactobacillus.s_Lactobacillus_johnsonii       | 43.831 | 8.6376 | 31.984 |
|        | g_Lactobacillus.s_Lactobacillus_reuteri         | 38.857 | 5.41   | 22.877 |
|        | g_Lactococcus.s_Lactococcus_lactis              | 1.3598 | 1.004  | 2.5363 |
|        | g_Leuconostoc.s_Leuconostoc_mesenteroides       | 0.1286 | 0.2118 | 0.1835 |
|        | g_Proteus.s_Proteus_mirabilis                   | 0      | 0.07   | 0      |
|        | g_Streptococcus.s_Streptococcus_thermophilus    | 0.0612 | 0.289  | 0.0625 |
| K00845 | glk K00845                                      | 59.62  | 48.079 | 62.107 |

|              |                  |                                                  |        |        |        |
|--------------|------------------|--------------------------------------------------|--------|--------|--------|
|              |                  | g_Aerococcus.s_Aerococcus_viridans               | 0      | 0.8894 | 0.8808 |
|              |                  | g_Alistipes.s_Alistipes_shahii                   | 0      | 0.554  | 0.2103 |
|              |                  | g_Bacteroides.s_Bacteroides_thetaiotaomicron     | 15.202 | 20.472 | 23.535 |
|              |                  | g_Bacteroides.s_Bacteroides_uniformis            | 0      | 6.519  | 0      |
|              |                  | g_Enterococcus.s_Enterococcus_faecalis           | 0      | 0.0338 | 0      |
|              |                  | g_Escherichia.s_Escherichia_coli                 | 0.4974 | 0.4102 | 0.0325 |
|              |                  | g_Klebsiella.s_Klebsiella_pneumoniae             | 0      | 0.2464 | 0      |
|              |                  | g_Lactobacillus.s_Lactobacillus_delbrueckii      | 0.5394 | 0.3014 | 0.1493 |
|              |                  | g_Lactobacillus.s_Lactobacillus_johnsonii        | 29.805 | 6.1234 | 18.176 |
|              |                  | g_Lactobacillus.s_Lactobacillus_reuteri          | 5.794  | 1.4972 | 3.626  |
|              |                  | g_Lactococcus.s_Lactococcus_lactis               | 0.7542 | 0.3936 | 0.9335 |
|              |                  | g_Lactococcus.s_Lactococcus_raffinolactis        | 0      | 0      | 0.073  |
|              |                  | g_Staphylococcus.s_Staphylococcus_xylosum        | 0.1962 | 0.4384 | 0.0423 |
|              |                  | K00845unclassified                               | 6.8318 | 10.201 | 14.448 |
| K01610       | E4.1.1.49,       | K01610                                           | 47.831 | 52.05  | 62.892 |
|              |                  | g_Bacteroides.s_Bacteroides_thetaiotaomicron     | 10.069 | 13.441 | 15.012 |
|              |                  | g_Bacteroides.s_Bacteroides_uniformis            | 0      | 6.1084 | 0      |
|              |                  | g_Deбaryomyces.s_Deбaryomyces_hansenii           | 3.6914 | 2.1228 | 0.85   |
|              |                  | g_Enterococcus.s_Enterococcus_faecalis           | 0      | 0      | 0.0352 |
|              |                  | g_Escherichia.s_Escherichia_coli                 | 0.6424 | 0.4978 | 0.0773 |
|              |                  | g_Klebsiella.s_Klebsiella_pneumoniae             | 0      | 0.4936 | 0      |
|              |                  | g_Lactobacillus.s_Lactobacillus_helveticus       | 0.109  | 0.243  | 0.0352 |
|              |                  | g_Parabacteroides.s_Parabacteroides_goldsteinii  | 5.9018 | 7.3852 | 12.762 |
|              |                  | g_Proteus.s_Proteus_mirabilis                    | 0.0406 | 0.0238 | 0      |
|              |                  | g_Staphylococcus.s_Staphylococcus_xylosum        | 0.734  | 0.6802 | 0.2692 |
|              |                  | K01610unclassified                               | 26.643 | 21.054 | 33.851 |
| K01835       | pgm              | K01835                                           | 42.661 | 45.206 | 52.53  |
|              |                  | g_Aerococcus.s_Aerococcus_viridans               | 0.0226 | 1.2674 | 0.8535 |
|              |                  | g_Alistipes.s_Alistipes_shahii                   | 0      | 0.5396 | 0.2572 |
|              |                  | g_Bacteroides.s_Bacteroides_thetaiotaomicron     | 6.4688 | 9.7104 | 9.8247 |
|              |                  | g_Bacteroides.s_Bacteroides_uniformis            | 0      | 4.455  | 0      |
|              |                  | g_Bifidobacterium.s_Bifidobacterium_pseudolongum | 0.1722 | 0.0666 | 1.1363 |
|              |                  | g_Corynebacterium.s_Corynebacterium_glutamicum   | 0.1462 | 1.3018 | 1.773  |
|              |                  | g_Deбaryomyces.s_Deбaryomyces_hansenii           | 5.6148 | 3.717  | 1.8298 |
|              |                  | g_Enterococcus.s_Enterococcus_faecalis           | 0.019  | 0      | 0.0168 |
|              |                  | g_Escherichia.s_Escherichia_coli                 | 0.3926 | 0.2796 | 0      |
|              |                  | g_Klebsiella.s_Klebsiella_pneumoniae             | 0      | 0.4152 | 0      |
|              |                  | g_Lactobacillus.s_Lactobacillus_delbrueckii      | 0.3086 | 0.4444 | 0.2442 |
|              |                  | g_Lactobacillus.s_Lactobacillus_reuteri          | 7.9652 | 1.576  | 4.6575 |
|              |                  | g_Meyerozyma.s_Meyerozyma_guilliermondii         | 0.0356 | 0      | 0      |
|              |                  | g_Proteus.s_Proteus_mirabilis                    | 0.0798 | 0.0866 | 0      |
|              |                  | g_Staphylococcus.s_Staphylococcus_xylosum        | 0.4054 | 0.072  | 0.1727 |
|              |                  | K01835unclassified                               | 21.031 | 21.274 | 31.764 |
| K01223       | E3.2.1.86IK01223 |                                                  | 57.945 | 23.996 | 50.551 |
|              |                  | g_Corynebacterium.s_Corynebacterium_glutamicum   | 0.093  | 1.2366 | 1.7353 |
|              |                  | g_Enterococcus.s_Enterococcus_faecalis           | 0.0226 | 0.3232 | 0.101  |
|              |                  | g_Escherichia.s_Escherichia_coli                 | 2.2252 | 2.1374 | 0.2917 |
|              |                  | g_Klebsiella.s_Klebsiella_pneumoniae             | 0      | 0.8758 | 0      |
|              |                  | g_Lactobacillus.s_Lactobacillus_delbrueckii      | 0.2138 | 0.1334 | 0.0247 |
|              |                  | g_Lactobacillus.s_Lactobacillus_helveticus       | 0.3086 | 0.2046 | 0.0643 |
|              |                  | g_Lactobacillus.s_Lactobacillus_johnsonii        | 43.483 | 8.041  | 36.255 |
|              |                  | g_Lactococcus.s_Lactococcus_lactis               | 3.5512 | 4.3946 | 3.5988 |
|              |                  | g_Lactococcus.s_Lactococcus_raffinolactis        | 0      | 0      | 0.0233 |
|              |                  | g_Leuconostoc.s_Leuconostoc_mesenteroides        | 0      | 0      | 0.1423 |
|              |                  | K01223unclassified                               | 8.0472 | 6.649  | 8.3145 |
| K03737       | por, nifJ        | K03737                                           | 50.752 | 35.958 | 42.417 |
| map00010_    |                  | g_Escherichia.s_Escherichia_coli                 | 0.1124 | 0.055  | 0      |
| Glycolysis / |                  | g_Klebsiella.s_Klebsiella_pneumoniae             | 0      | 0.2408 | 0      |

|                 |        |                  |                                                  |        |        |        |
|-----------------|--------|------------------|--------------------------------------------------|--------|--------|--------|
| Gluconeogenesis | K00175 | korB, oorK00175  | K03737unclassified                               | 50.64  | 35.662 | 42.417 |
|                 |        |                  | K00175unclassified                               | 33.585 | 40.981 | 44.244 |
|                 |        |                  | g_Bacteroides.s_Bacteroides_thetaiotaomicron     | 14.626 | 18.831 | 18.709 |
|                 |        |                  | g_Enterorhabdus.s_Enterorhabdus_caecimuris       | 0.677  | 1.9052 | 1.3792 |
|                 |        |                  | g_Parabacteroides.s_Parabacteroides_goldsteinii  | 3.824  | 3.7356 | 6.9213 |
|                 |        |                  | K00175unclassified                               | 14.458 | 16.509 | 17.235 |
|                 | K15633 | gpml             | K15633                                           | 25.374 | 35.77  | 52.876 |
|                 |        |                  | g_Aerococcus.s_Aerococcus_viridans               | 0.0772 | 0.9864 | 0.9688 |
|                 |        |                  | g_Alistipes.s_Alistipes_shahii                   | 0      | 0.3858 | 0.1832 |
|                 |        |                  | g_Bacteroides.s_Bacteroides_thetaiotaomicron     | 7.218  | 11.596 | 13.382 |
|                 |        |                  | g_Bacteroides.s_Bacteroides_uniformis            | 0      | 6.352  | 0      |
|                 |        |                  | g_Escherichia.s_Escherichia_coli                 | 0.786  | 0.4688 | 0.0592 |
|                 |        |                  | g_Parabacteroides.s_Parabacteroides_goldsteinii  | 2.486  | 2.7384 | 7.4288 |
|                 |        |                  | g_Staphylococcus.s_Staphylococcus_xylosus        | 0.9952 | 0.7928 | 0.6898 |
|                 |        |                  | K15633unclassified                               | 13.811 | 12.451 | 30.164 |
|                 | K00873 | PK, pyk          | K00873                                           | 27.381 | 29.173 | 34.432 |
|                 |        |                  | g_Aerococcus.s_Aerococcus_viridans               | 0.0504 | 1.5808 | 2.5435 |
|                 |        |                  | g_Alistipes.s_Alistipes_shahii                   | 0      | 0.3264 | 0.264  |
|                 |        |                  | g_Bacteroides.s_Bacteroides_thetaiotaomicron     | 8.0242 | 10.642 | 10.76  |
|                 |        |                  | g_Bifidobacterium.s_Bifidobacterium_pseudolongum | 0.1276 | 0.1358 | 0.6548 |
|                 |        |                  | g_Corynebacterium.s_Corynebacterium_glutamicum   | 0.1882 | 2.5728 | 4.0065 |
|                 |        |                  | g_Debaryomyces.s_Debaryomyces_hansenii           | 3.9572 | 2.1684 | 1.0065 |
|                 |        |                  | g_Escherichia.s_Escherichia_coli                 | 1.027  | 1.2106 | 0.0657 |
|                 |        |                  | g_Klebsiella.s_Klebsiella_pneumoniae             | 0      | 0.2628 | 0      |
|                 |        |                  | g_Lactobacillus.s_Lactobacillus_delbrueckii      | 0.1984 | 0.2148 | 0.0698 |
|                 |        |                  | g_Lactobacillus.s_Lactobacillus_helveticus       | 0.196  | 0.1222 | 0.0368 |
|                 |        |                  | g_Lactobacillus.s_Lactobacillus_murinus          | 2.0392 | 2.0868 | 0.4272 |
|                 |        |                  | g_Lactobacillus.s_Lactobacillus_reuteri          | 6.1448 | 1.2    | 3.222  |
|                 |        |                  | g_Lactococcus.s_Lactococcus_lactis               | 0.854  | 0.8276 | 0.3952 |
|                 |        |                  | g_Meyerozyma.s_Meyerozyma_guilliermondii         | 0.0436 | 0      | 0      |
|                 |        |                  | g_Proteus.s_Proteus_mirabilis                    | 0.108  | 0.0636 | 0      |
|                 |        |                  | g_Staphylococcus.s_Staphylococcus_xylosus        | 0.7648 | 0.6506 | 0.392  |
|                 |        |                  | K00873unclassified                               | 3.6574 | 5.1072 | 10.588 |
|                 | K21071 | pfk, pfp         | K21071                                           | 22.381 | 28.191 | 39.031 |
|                 |        |                  | g_Alistipes.s_Alistipes_shahii                   | 0      | 0.4756 | 0.3247 |
|                 |        |                  | g_Bacteroides.s_Bacteroides_thetaiotaomicron     | 8.268  | 12.126 | 8.9795 |
|                 |        |                  | g_Corynebacterium.s_Corynebacterium_glutamicum   | 0.1612 | 1.4986 | 1.8255 |
|                 |        |                  | K21071unclassified                               | 13.952 | 14.09  | 27.901 |
|                 | K00382 | DLD, lpd, K00382 | K00382                                           | 20.384 | 22.183 | 35.255 |
|                 |        |                  | g_Aerococcus.s_Aerococcus_viridans               | 0.0282 | 1.1376 | 1.1237 |
|                 |        |                  | g_Alistipes.s_Alistipes_shahii                   | 0      | 0.4702 | 0.1685 |
|                 |        |                  | g_Bacteroides.s_Bacteroides_thetaiotaomicron     | 5.1822 | 7.1946 | 8.3845 |
|                 |        |                  | g_Corynebacterium.s_Corynebacterium_glutamicum   | 0.1736 | 1.419  | 2.1947 |
|                 |        |                  | g_Debaryomyces.s_Debaryomyces_hansenii           | 3.4276 | 2.2896 | 1.013  |
|                 |        |                  | g_Enterococcus.s_Enterococcus_faecalis           | 0      | 2.3126 | 0.0483 |
|                 |        |                  | g_Escherichia.s_Escherichia_coli                 | 0.9426 | 0.9026 | 0.0855 |
|                 |        |                  | g_Klebsiella.s_Klebsiella_pneumoniae             | 0      | 0.2652 | 0      |
|                 |        |                  | g_Lactobacillus.s_Lactobacillus_reuteri          | 6.6142 | 1.0754 | 3.6773 |
|                 |        |                  | g_Lactococcus.s_Lactococcus_lactis               | 1.1106 | 0.8538 | 0.6305 |
|                 |        |                  | g_Leuconostoc.s_Leuconostoc_mesenteroides        | 0.1454 | 0.1552 | 0.1507 |
|                 |        |                  | g_Meyerozyma.s_Meyerozyma_guilliermondii         | 0.0224 | 0      | 0      |
|                 |        |                  | g_Proteus.s_Proteus_mirabilis                    | 0      | 0.0206 | 0      |
|                 |        |                  | g_Staphylococcus.s_Staphylococcus_xylosus        | 0.8618 | 0.5668 | 0.623  |
|                 |        |                  | g_Streptococcus.s_Streptococcus_thermophilus     | 0.5502 | 0.3934 | 0.3417 |
|                 |        |                  | K00382unclassified                               | 1.3252 | 3.126  | 16.813 |
|                 | K11645 | fbaB             | K11645                                           | 12.401 | 29.494 | 27.211 |
|                 |        |                  | g_Alistipes.s_Alistipes_shahii                   | 0      | 0.3114 | 0.1618 |
|                 |        |                  | g_Bacteroides.s_Bacteroides_thetaiotaomicron     | 5.6224 | 7.5208 | 9.1868 |

|        |                        |                                                        |        |        |        |
|--------|------------------------|--------------------------------------------------------|--------|--------|--------|
|        |                        | <i>g_Enterorhabdus.s_Enterorhabdus_caecimuris</i>      | 3.6964 | 13.415 | 10.305 |
|        |                        | <i>g_Escherichia.s_Escherichia_coli</i>                | 0.7352 | 0.5274 | 0.0588 |
|        |                        | <i>g_Klebsiella.s_Klebsiella_pneumoniae</i>            | 0      | 0.7008 | 0      |
|        |                        | <i>g_Proteus.s_Proteus_mirabilis</i>                   | 0      | 0.0946 | 0      |
|        |                        | K11645unclassified                                     | 2.3462 | 6.9238 | 7.4983 |
| K13953 | adhP                   | K13953                                                 | 24.754 | 11.209 | 21.74  |
|        |                        | <i>g_Debaryomyces.s_Debaryomyces_hansenii</i>          | 8.0348 | 6.3436 | 3.4947 |
|        |                        | <i>g_Enterococcus.s_Enterococcus_faecalis</i>          | 0      | 0.123  | 0.0613 |
|        |                        | <i>g_Escherichia.s_Escherichia_coli</i>                | 0.1366 | 0.2134 | 0      |
|        |                        | <i>g_Klebsiella.s_Klebsiella_pneumoniae</i>            | 0      | 0.1098 | 0      |
|        |                        | <i>g_Lactobacillus.s_Lactobacillus_reuteri</i>         | 15.045 | 2.703  | 8.4713 |
|        |                        | <i>g_Lactococcus.s_Lactococcus_lactis</i>              | 0.8236 | 0.5018 | 0.6493 |
|        |                        | <i>g_Streptococcus.s_Streptococcus_thermophilus</i>    | 0.3152 | 0.252  | 0.538  |
|        |                        | K13953unclassified                                     | 0.3992 | 0.9626 | 8.5253 |
| K00174 | korA, oor <sub>2</sub> | K00174                                                 | 10.876 | 14.79  | 19.439 |
|        |                        | <i>g_Alistipes.s_Alistipes_shahii</i>                  | 0      | 0.4878 | 0.239  |
|        |                        | <i>g_Bacteroides.s_Bacteroides_uniformis</i>           | 0      | 0.4094 | 0      |
|        |                        | <i>g_Enterorhabdus.s_Enterorhabdus_caecimuris</i>      | 1.0782 | 3.0664 | 2.6482 |
|        |                        | <i>g_Parabacteroides.s_Parabacteroides_goldsteinii</i> | 2.827  | 2.3198 | 5.6347 |
|        |                        | K00174unclassified                                     | 6.971  | 8.5066 | 10.917 |
| K00844 | HK                     | K00844                                                 | 14.981 | 16.244 | 12.087 |
|        |                        | <i>g_Bacteroides.s_Bacteroides_thetaiotaomicron</i>    | 6.6494 | 9.8578 | 9.5063 |
|        |                        | <i>g_Debaryomyces.s_Debaryomyces_hansenii</i>          | 8.331  | 6.3866 | 2.58   |
| K00128 | ALDH                   | K00128                                                 | 12.097 | 10.635 | 16.006 |
|        |                        | <i>g_Aerococcus.s_Aerococcus_viridans</i>              | 0.028  | 0.5772 | 1.2963 |
|        |                        | <i>g_Alistipes.s_Alistipes_shahii</i>                  | 0      | 0.5984 | 0.0972 |
|        |                        | <i>g_Debaryomyces.s_Debaryomyces_hansenii</i>          | 10.967 | 8.1784 | 3.5058 |
|        |                        | <i>g_Meyerozyma.s_Meyerozyma_guilliermondii</i>        | 0.0394 | 0      | 0      |
|        |                        | K00128unclassified                                     | 1.0616 | 1.2814 | 11.107 |
| K04041 | fbp3                   | K04041                                                 | 8.6184 | 10.539 | 17.74  |
|        |                        | <i>g_Enterococcus.s_Enterococcus_faecalis</i>          | 0.0518 | 0.1834 | 0      |
|        |                        | <i>g_Lactococcus.s_Lactococcus_lactis</i>              | 0.7366 | 0.713  | 0.6677 |
|        |                        | <i>g_Staphylococcus.s_Staphylococcus_lentus</i>        | 0.603  | 0.419  | 1.1113 |
|        |                        | K04041unclassified                                     | 7.2272 | 9.2236 | 15.96  |
| K01895 | ACSS, acs              | K01895                                                 | 5.473  | 14.73  | 15.043 |
|        |                        | <i>g_Alistipes.s_Alistipes_shahii</i>                  | 0      | 0.4782 | 0.2313 |
|        |                        | <i>g_Enterorhabdus.s_Enterorhabdus_caecimuris</i>      | 2.8864 | 9.2162 | 7.1207 |
|        |                        | <i>g_Escherichia.s_Escherichia_coli</i>                | 0      | 0.033  | 0      |
|        |                        | <i>g_Klebsiella.s_Klebsiella_pneumoniae</i>            | 0      | 0.3264 | 0      |
|        |                        | <i>g_Staphylococcus.s_Staphylococcus_xylosum</i>       | 0.8274 | 0.3712 | 0.4298 |
|        |                        | K01895unclassified                                     | 1.7588 | 4.3048 | 7.261  |
| K00002 | AKR1A1, K00002         |                                                        | 17.488 | 11.275 | 6.0695 |
|        |                        | <i>g_Debaryomyces.s_Debaryomyces_hansenii</i>          | 17.278 | 11.275 | 6.0695 |
|        |                        | K00002unclassified                                     | 0.2108 | 0      | 0      |
| K00627 | DLAT, ac               | K00627                                                 | 11.558 | 7.6654 | 7.9968 |
|        |                        | <i>g_Aerococcus.s_Aerococcus_viridans</i>              | 0.0236 | 1.24   | 1.0133 |
|        |                        | <i>g_Debaryomyces.s_Debaryomyces_hansenii</i>          | 2.9364 | 2.8058 | 1.2058 |
|        |                        | <i>g_Escherichia.s_Escherichia_coli</i>                | 0.2836 | 0.1904 | 0.0152 |
|        |                        | <i>g_Klebsiella.s_Klebsiella_pneumoniae</i>            | 0      | 0.2664 | 0      |
|        |                        | <i>g_Lactobacillus.s_Lactobacillus_reuteri</i>         | 5.876  | 1.5222 | 3.6615 |
|        |                        | <i>g_Lactococcus.s_Lactococcus_lactis</i>              | 0.8062 | 0.6622 | 0.5928 |
|        |                        | <i>g_Leuconostoc.s_Leuconostoc_mesenteroides</i>       | 0.1508 | 0.058  | 0.244  |
|        |                        | <i>g_Meyerozyma.s_Meyerozyma_guilliermondii</i>        | 0.0234 | 0      | 0      |
|        |                        | <i>g_Staphylococcus.s_Staphylococcus_xylosum</i>       | 1.4576 | 0.9206 | 1.068  |
|        |                        | K00627unclassified                                     | 0      | 0      | 0.196  |
| K00170 | porB                   | K00170                                                 | 9.322  | 7.7956 | 8.5498 |
|        |                        | K00170unclassified                                     | 9.322  | 7.7956 | 8.5498 |
| K00162 | PDHB, pd               | K00162                                                 | 10.545 | 6.0772 | 6.5642 |

|        |             |                                                |        |        |        |
|--------|-------------|------------------------------------------------|--------|--------|--------|
|        |             | g_Aerococcus.s_Aerococcus_viridans             | 0      | 1.5022 | 1.1098 |
|        |             | g_Deбaryomyces.s_Deбaryomyces_hansenii         | 3.1704 | 2.3084 | 1.2042 |
|        |             | g_Lactobacillus.s_Lactobacillus_reuteri        | 6.4646 | 1.1136 | 3.1885 |
|        |             | g_Lactococcus.s_Lactococcus_lactis             | 0.664  | 0.8478 | 0.833  |
|        |             | g_Leuconostoc.s_Leuconostoc_mesenteroides      | 0.0956 | 0.305  | 0.2283 |
|        |             | K00162unclassified                             | 0.1506 | 0      | 0      |
| K00161 | PDHA, pd    | K00161                                         | 10.77  | 4.42   | 5.9217 |
|        |             | g_Deбaryomyces.s_Deбaryomyces_hansenii         | 3.5882 | 1.7386 | 1.1207 |
|        |             | g_Lactobacillus.s_Lactobacillus_reuteri        | 6.3764 | 1.3214 | 3.7093 |
|        |             | g_Lactococcus.s_Lactococcus_lactis             | 0.6122 | 0.926  | 0.8008 |
|        |             | g_Leuconostoc.s_Leuconostoc_mesenteroides      | 0.1928 | 0.434  | 0.1817 |
|        |             | K00161unclassified                             | 0      | 0      | 0.1092 |
| K00001 | E1.1.1.1, ε | K00001                                         | 8.0324 | 2.3946 | 7.003  |
|        |             | g_Corynebacterium.s_Corynebacterium_glutamicum | 0      | 0.3546 | 1.0567 |
|        |             | g_Lactobacillus.s_Lactobacillus_reuteri        | 7.2524 | 1.2574 | 4.9153 |
|        |             | g_Lactococcus.s_Lactococcus_lactis             | 0.78   | 0.567  | 0.5658 |
|        |             | K00001unclassified                             | 0      | 0.2156 | 0.4652 |
| K01596 | E4.1.1.32,  | K01596                                         | 0.5712 | 2.2956 | 12.637 |
|        |             | g_Corynebacterium.s_Corynebacterium_glutamicum | 0.19   | 1.2624 | 2.4665 |
|        |             | K01596unclassified                             | 0.3812 | 1.0332 | 10.17  |
| K01568 | PDC, pdc    | K01568                                         | 8.017  | 6.3528 | 2.6737 |
|        |             | g_Deбaryomyces.s_Deбaryomyces_hansenii         | 7.9982 | 6.3528 | 2.6737 |
|        |             | g_Meyerozyma.s_Meyerozyma_guilliermondii       | 0.0188 | 0      | 0      |
| K00138 | aldB        | K00138                                         | 0.9774 | 1.7876 | 9.8015 |
|        |             | g_Escherichia.s_Escherichia_coli               | 0.566  | 0.7036 | 0.0383 |
|        |             | K00138unclassified                             | 0.4114 | 1.084  | 9.7633 |
| K00163 | aceE        | K00163                                         | 0.1566 | 2.3746 | 9.8505 |
|        |             | g_Corynebacterium.s_Corynebacterium_glutamicum | 0.1566 | 1.1216 | 2.1127 |
|        |             | g_Klebsiella.s_Klebsiella_pneumoniae           | 0      | 0.2932 | 0      |
|        |             | K00163unclassified                             | 0      | 0.9594 | 7.7377 |
| K02446 | glpX        | K02446                                         | 2.0784 | 3.5136 | 5.7693 |
|        |             | g_Corynebacterium.s_Corynebacterium_glutamicum | 0.086  | 1.3112 | 1.7555 |
|        |             | g_Escherichia.s_Escherichia_coli               | 1.6978 | 0.9946 | 0.1693 |
|        |             | g_Klebsiella.s_Klebsiella_pneumoniae           | 0      | 0.4658 | 0      |
|        |             | K02446unclassified                             | 0.2946 | 0.742  | 3.8445 |
| K00172 | porG        | K00172                                         | 5.0798 | 1.4052 | 4.376  |
|        |             | K00172unclassified                             | 5.0798 | 1.4052 | 4.376  |
| K00121 | frmA, AD    | K00121                                         | 5.1084 | 4.044  | 1.3238 |
|        |             | g_Aerococcus.s_Aerococcus_viridans             | 0      | 0.5824 | 0.4003 |
|        |             | g_Deбaryomyces.s_Deбaryomyces_hansenii         | 3.2122 | 2.3226 | 0.692  |
|        |             | g_Escherichia.s_Escherichia_coli               | 0.7642 | 0.2856 | 0.0807 |
|        |             | g_Klebsiella.s_Klebsiella_pneumoniae           | 0      | 0.4184 | 0      |
|        |             | g_Staphylococcus.s_Staphylococcus_xylosus      | 0.9582 | 0.4354 | 0.1512 |
|        |             | K00121unclassified                             | 0.1738 | 0      | 0      |
| K04072 | adhE        | K04072                                         | 2.8668 | 2.2428 | 4.4042 |
|        |             | g_Klebsiella.s_Klebsiella_pneumoniae           | 0      | 0.3986 | 0      |
|        |             | K04072unclassified                             | 2.8668 | 1.8442 | 4.4042 |
| K00150 | gap2        | K00150                                         | 3.7306 | 1.8514 | 3.2198 |
|        |             | K00150unclassified                             | 3.7306 | 1.8514 | 3.2198 |
| K03841 | FBP, fbp    | K03841                                         | 3.2946 | 3.3838 | 1.962  |
|        |             | g_Deбaryomyces.s_Deбaryomyces_hansenii         | 2.6468 | 1.9308 | 1.3525 |
|        |             | g_Escherichia.s_Escherichia_coli               | 0.613  | 0.5756 | 0      |
|        |             | g_Klebsiella.s_Klebsiella_pneumoniae           | 0      | 0.8018 | 0      |
|        |             | g_Proteus.s_Proteus_mirabilis                  | 0.0348 | 0.0752 | 0      |
|        |             | K03841unclassified                             | 0      | 0      | 0.6095 |
| K01792 | E5.1.3.15   | K01792                                         | 3.2492 | 3.0398 | 0.9442 |
|        |             | g_Deбaryomyces.s_Deбaryomyces_hansenii         | 2.528  | 2.8516 | 0.9442 |
|        |             | g_Escherichia.s_Escherichia_coli               | 0.7212 | 0.1884 | 0      |

|        |                 |                                                |        |        |        |
|--------|-----------------|------------------------------------------------|--------|--------|--------|
| K00129 | E1.2.1.5        | K00129                                         | 3.4008 | 2.2524 | 1.1298 |
|        |                 | g_Debaryomyces.s_Debaryomyces_hansenii         | 3.4008 | 2.2524 | 1.1298 |
| K00895 | pfp, PFP        | K00895                                         | 0.7372 | 1.6748 | 2.925  |
|        |                 | K00895unclassified                             | 0.7372 | 1.6748 | 2.925  |
| K20866 | yihX            | K20866                                         | 1.5808 | 2.938  | 1.1372 |
|        |                 | g_Alistipes.s_Alistipes_shahii                 | 0      | 1.1484 | 0.3617 |
|        |                 | g_Escherichia.s_Escherichia_coli               | 0.9596 | 0.9136 | 0.2057 |
|        |                 | g_Klebsiella.s_Klebsiella_pneumoniae           | 0      | 0.401  | 0      |
|        |                 | g_Lactococcus.s_Lactococcus_lactis             | 0.621  | 0.4752 | 0.57   |
| K01623 | ALDO            | K01623                                         | 0.726  | 1.7768 | 2.368  |
|        |                 | g_Aerococcus.s_Aerococcus_viridans             | 0      | 1.0984 | 1.9128 |
|        |                 | g_Staphylococcus.s_Staphylococcus_xylosus      | 0.726  | 0.6784 | 0.4552 |
| K01222 | E3.2.1.86       | K01222                                         | 0.5118 | 2.964  | 1.1765 |
|        |                 | g_Aerococcus.s_Aerococcus_viridans             | 0      | 0.5556 | 0.8328 |
|        |                 | g_Escherichia.s_Escherichia_coli               | 0.5118 | 0.3456 | 0.047  |
|        |                 | g_Klebsiella.s_Klebsiella_pneumoniae           | 0      | 1.725  | 0      |
|        |                 | K01222unclassified                             | 0      | 0.3376 | 0.2967 |
| K00886 | ppgK            | K00886                                         | 0.1222 | 0.5304 | 2.3575 |
|        |                 | g_Corynebacterium.s_Corynebacterium_glutamicum | 0.1222 | 0.5304 | 2.3575 |
| K02777 | PTS-Glc-IK02777 | K02777                                         | 1.1544 | 1.135  | 0.7515 |
|        |                 | g_Enterococcus.s_Enterococcus_faecalis         | 0      | 0.107  | 0      |
|        |                 | g_Escherichia.s_Escherichia_coli               | 0      | 0.3902 | 0.1473 |
|        |                 | g_Klebsiella.s_Klebsiella_pneumoniae           | 0      | 0.1794 | 0      |
|        |                 | g_Lactobacillus.s_Lactobacillus_delbrueckii    | 0.3666 | 0.1904 | 0.1717 |
|        |                 | g_Staphylococcus.s_Staphylococcus_xylosus      | 0.698  | 0.2684 | 0.4325 |
|        |                 | K02777unclassified                             | 0.0898 | 0      | 0      |
| K02791 | PTS-MalCK02791  | K02791                                         | 0.7214 | 1.2302 | 0.0375 |
|        |                 | g_Enterococcus.s_Enterococcus_faecalis         | 0.042  | 0.126  | 0.0375 |
|        |                 | g_Escherichia.s_Escherichia_coli               | 0.6164 | 0.5428 | 0      |
|        |                 | g_Klebsiella.s_Klebsiella_pneumoniae           | 0      | 0.4972 | 0      |
|        |                 | g_Proteus.s_Proteus_mirabilis                  | 0.063  | 0.0642 | 0      |
| K00169 | porA            | K00169                                         | 1.3208 | 0.6024 | 0      |
|        |                 | K00169unclassified                             | 1.3208 | 0.6024 | 0      |
| K02779 | PTS-Glc-IK02779 | K02779                                         | 0.9198 | 0.655  | 0.0867 |
|        |                 | g_Escherichia.s_Escherichia_coli               | 0.7478 | 0.3854 | 0.024  |
|        |                 | g_Klebsiella.s_Klebsiella_pneumoniae           | 0      | 0.2696 | 0      |
|        |                 | g_Lactobacillus.s_Lactobacillus_johnsonii      | 0.1488 | 0      | 0.0627 |
|        |                 | g_Proteus.s_Proteus_mirabilis                  | 0.023  | 0      | 0      |
| K13954 | yiaY            | K13954                                         | 0.9    | 0.5192 | 0.053  |
|        |                 | g_Escherichia.s_Escherichia_coli               | 0.9    | 0.5192 | 0.053  |
| K00171 | porD            | K00171                                         | 0.5288 | 0.1202 | 0.4772 |
|        |                 | K00171unclassified                             | 0.5288 | 0.1202 | 0.4772 |
| K04022 | eutG            | K04022                                         | 0.5706 | 0.5538 | 0.0257 |
|        |                 | g_Escherichia.s_Escherichia_coli               | 0.5706 | 0.5538 | 0.0257 |
| K00131 | gapN            | K00131                                         | 0.4324 | 0.4108 | 0.0942 |
|        |                 | g_Lactobacillus.s_Lactobacillus_delbrueckii    | 0.4106 | 0.3838 | 0.0468 |
|        |                 | g_Lactococcus.s_Lactococcus_raffinolactis      | 0.022  | 0.0272 | 0.0473 |
| K01085 | agp             | K01085                                         | 0.3738 | 0.436  | 0      |
|        |                 | g_Escherichia.s_Escherichia_coli               | 0.3738 | 0.436  | 0      |
| K16370 | pfkB            | K16370                                         | 0.482  | 0.3224 | 0      |
|        |                 | g_Escherichia.s_Escherichia_coli               | 0.482  | 0.3224 | 0      |
| K02753 | PTS-Asc-IK02753 | K02753                                         | 0.2218 | 0.5076 | 0.0412 |
|        |                 | g_Escherichia.s_Escherichia_coli               | 0.2218 | 0.3758 | 0.0412 |
|        |                 | g_Klebsiella.s_Klebsiella_pneumoniae           | 0      | 0.1318 | 0      |
| K02778 | PTS-Glc-IK02778 | K02778                                         | 0      | 0.1794 | 0      |
|        |                 | g_Klebsiella.s_Klebsiella_pneumoniae           | 0      | 0.1794 | 0      |
| K02112 | ATPF1B, K02112  | K02112                                         | 98.436 | 93.726 | 131.56 |
|        |                 | g_Bacteroides.s_Bacteroides_uniformis          | 0      | 3.4052 | 0      |



|        |                                                  |        |        |        |
|--------|--------------------------------------------------|--------|--------|--------|
|        | g_Bifidobacterium.s_Bifidobacterium_pseudolongum | 0.225  | 0.4002 | 1.403  |
|        | g_Corynebacterium.s_Corynebacterium_glutamicum   | 0.3216 | 1.293  | 4.1557 |
|        | g_Enterococcus.s_Enterococcus_faecalis           | 0.0238 | 0.1438 | 0      |
|        | g_Enterorhabdus.s_Enterorhabdus_caecimuris       | 3.6526 | 13.046 | 10.005 |
|        | g_Escherichia.s_Escherichia_coli                 | 0.7378 | 0.986  | 0.0897 |
|        | g_Klebsiella.s_Klebsiella_pneumoniae             | 0      | 0.3228 | 0      |
|        | g_Lactobacillus.s_Lactobacillus_delbrueckii      | 0.3058 | 0.3382 | 0.1125 |
|        | g_Lactobacillus.s_Lactobacillus_helveticus       | 0.1332 | 0.2118 | 0.0648 |
|        | g_Lactobacillus.s_Lactobacillus_johnsonii        | 21.084 | 3.9476 | 13.35  |
|        | g_Lactobacillus.s_Lactobacillus_murinus          | 2.801  | 2.4508 | 0.4555 |
|        | g_Lactobacillus.s_Lactobacillus_reuteri          | 7.1878 | 1.3004 | 4.2463 |
|        | g_Lactococcus.s_Lactococcus_lactis               | 0.6442 | 0.7202 | 0.8208 |
|        | g_Lactococcus.s_Lactococcus_raffinolactis        | 0      | 0.05   | 0.1187 |
|        | g_Leuconostoc.s_Leuconostoc_lactis               | 0      | 0      | 0.171  |
|        | g_Leuconostoc.s_Leuconostoc_mesenteroides        | 0.1622 | 0.1962 | 0.325  |
|        | g_Parabacteroides.s_Parabacteroides_goldsteinii  | 2.5736 | 2.85   | 6.5953 |
|        | g_Proteus.s_Proteus_mirabilis                    | 0      | 0.0244 | 0      |
|        | g_Staphylococcus.s_Staphylococcus_xylosus        | 1.0162 | 0.4998 | 0.9167 |
|        | g_Streptococcus.s_Streptococcus_thermophilus     | 0.7204 | 0.4336 | 0.5678 |
|        | K02112unclassified                               | 56.847 | 61.106 | 88.163 |
| K02111 | ATPF1A, K02111                                   | 103.96 | 94.655 | 109.89 |
|        | g_Bacteroides.s_Bacteroides_thetaiotaomicron     | 4.7318 | 7.3988 | 7.3517 |
|        | g_Bacteroides.s_Bacteroides_uniformis            | 0      | 4.7154 | 0      |
|        | g_Bifidobacterium.s_Bifidobacterium_pseudolongum | 0.2046 | 0.1366 | 0.9292 |
|        | g_Corynebacterium.s_Corynebacterium_glutamicum   | 0.1976 | 1.1302 | 2.8743 |
|        | g_Enterococcus.s_Enterococcus_faecalis           | 0.0424 | 0.046  | 0.0188 |
|        | g_Enterorhabdus.s_Enterorhabdus_caecimuris       | 3.7756 | 11.06  | 8.9457 |
|        | g_Eubacterium.s_Eubacterium_plexicaudatum        | 0.1222 | 0.2798 | 0.0648 |
|        | g_Eubacterium.s_Eubacterium_sp_14_2              | 6.3678 | 1.9814 | 0      |
|        | g_Lactobacillus.s_Lactobacillus_delbrueckii      | 0.2304 | 0.4474 | 0.0435 |
|        | g_Lactobacillus.s_Lactobacillus_helveticus       | 0.216  | 0.2324 | 0      |
|        | g_Lactobacillus.s_Lactobacillus_johnsonii        | 23.291 | 3.5836 | 14.424 |
|        | g_Lactobacillus.s_Lactobacillus_murinus          | 2.6808 | 2.7196 | 0.457  |
|        | g_Lactobacillus.s_Lactobacillus_reuteri          | 6.718  | 1.4574 | 4.7718 |
|        | g_Lactococcus.s_Lactococcus_lactis               | 0.6072 | 0.912  | 0.7038 |
|        | g_Leuconostoc.s_Leuconostoc_lactis               | 0      | 0.0218 | 0.0223 |
|        | g_Leuconostoc.s_Leuconostoc_mesenteroides        | 0.1394 | 0.0958 | 0.252  |
|        | g_Parabacteroides.s_Parabacteroides_goldsteinii  | 2.9232 | 3.0672 | 6.4908 |
|        | g_Proteus.s_Proteus_mirabilis                    | 0.0214 | 0.0214 | 0      |
|        | g_Staphylococcus.s_Staphylococcus_lentus         | 0.7886 | 0.199  | 2.1533 |
|        | g_Streptococcus.s_Streptococcus_thermophilus     | 0.3046 | 0.6354 | 0.869  |
|        | K02111unclassified                               | 50.597 | 54.514 | 59.522 |
| K02110 | ATPF0C, K02110                                   | 72.076 | 76.67  | 102.83 |
|        | g_Bacteroides.s_Bacteroides_thetaiotaomicron     | 11.382 | 17.457 | 20.504 |
|        | g_Bacteroides.s_Bacteroides_uniformis            | 0      | 6.0688 | 0      |
|        | g_Bifidobacterium.s_Bifidobacterium_pseudolongum | 0.8676 | 0.3632 | 1.8918 |
|        | g_Enterorhabdus.s_Enterorhabdus_caecimuris       | 1.9074 | 7.4686 | 11.133 |
|        | g_Escherichia.s_Escherichia_coli                 | 1.6036 | 1.0384 | 0      |
|        | g_Klebsiella.s_Klebsiella_pneumoniae             | 0      | 0.4066 | 0      |
|        | g_Lactobacillus.s_Lactobacillus_delbrueckii      | 0.3668 | 0      | 0      |
|        | g_Lactobacillus.s_Lactobacillus_johnsonii        | 28.568 | 3.6592 | 16.126 |
|        | g_Lactobacillus.s_Lactobacillus_reuteri          | 7.851  | 0.793  | 3.5573 |
|        | g_Lactococcus.s_Lactococcus_lactis               | 3.6404 | 1.7782 | 0.1968 |
|        | g_Leuconostoc.s_Leuconostoc_mesenteroides        | 0      | 0      | 0.3792 |
|        | g_Staphylococcus.s_Staphylococcus_xylosus        | 0.6132 | 1.6826 | 0      |
|        | g_Streptococcus.s_Streptococcus_thermophilus     | 0.2762 | 0      | 0      |
|        | K02110unclassified                               | 15     | 35.954 | 49.046 |
| K02118 | ATPVB, nK02118                                   | 49.474 | 51.37  | 57.854 |

|        |                                                 |        |        |        |
|--------|-------------------------------------------------|--------|--------|--------|
|        | g_Aerococcus.s_Aerococcus_viridans              | 0      | 1.8206 | 2.6375 |
|        | g_Bacteroides.s_Bacteroides_thetaiotaomicron    | 9.7832 | 14.126 | 15.428 |
|        | g_Bacteroides.s_Bacteroides_uniformis           | 0      | 6.6796 | 0      |
|        | g_Enterococcus.s_Enterococcus_faecalis          | 0      | 0.0284 | 0.065  |
|        | K02118unclassified                              | 39.692 | 28.715 | 39.723 |
| K02115 | ATPF1G, K02115                                  | 47.89  | 39.191 | 57.249 |
|        | g_Bacteroides.s_Bacteroides_thetaiotaomicron    | 6.6242 | 7.9288 | 10.549 |
|        | g_Corynebacterium.s_Corynebacterium_glutamicum  | 0.0904 | 1.5898 | 2.499  |
|        | g_Enterococcus.s_Enterococcus_faecalis          | 0      | 0.0974 | 0      |
|        | g_Enterorhabdus.s_Enterorhabdus_caecimuris      | 3.9838 | 9.9508 | 8.2223 |
|        | g_Escherichia.s_Escherichia_coli                | 0.5064 | 0.7136 | 0.0743 |
|        | g_Klebsiella.s_Klebsiella_pneumoniae            | 0      | 0.5788 | 0      |
|        | g_Lactobacillus.s_Lactobacillus_delbrueckii     | 0.1606 | 0.3982 | 0.0748 |
|        | g_Lactobacillus.s_Lactobacillus_helveticus      | 0.119  | 0.157  | 0.0737 |
|        | g_Lactobacillus.s_Lactobacillus_johnsonii       | 19.614 | 2.55   | 12.513 |
|        | g_Lactobacillus.s_Lactobacillus_reuteri         | 6.3612 | 0.9096 | 4.1032 |
|        | g_Lactococcus.s_Lactococcus_lactis              | 0.6038 | 0.6834 | 0.43   |
|        | g_Leuconostoc.s_Leuconostoc_mesenteroides       | 0.3824 | 0.0876 | 0.3428 |
|        | g_Staphylococcus.s_Staphylococcus_xylosus       | 1.0732 | 1.1532 | 0.5905 |
|        | g_Streptococcus.s_Streptococcus_thermophilus    | 0.2564 | 0.6384 | 0.6788 |
|        | K02115unclassified                              | 8.1146 | 11.754 | 17.098 |
| K02109 | ATPF0B, K02109                                  | 43.798 | 21.823 | 38.752 |
|        | g_Bacteroides.s_Bacteroides_thetaiotaomicron    | 5.8178 | 10.379 | 13.567 |
|        | g_Enterococcus.s_Enterococcus_faecalis          | 0      | 0.0968 | 0      |
|        | g_Escherichia.s_Escherichia_coli                | 1.2256 | 1.2394 | 0.0825 |
|        | g_Klebsiella.s_Klebsiella_pneumoniae            | 0      | 0.5232 | 0      |
|        | g_Lactobacillus.s_Lactobacillus_delbrueckii     | 0      | 0.1808 | 0      |
|        | g_Lactobacillus.s_Lactobacillus_helveticus      | 0.2902 | 0      | 0.0843 |
|        | g_Lactobacillus.s_Lactobacillus_johnsonii       | 23.932 | 3.8216 | 12.906 |
|        | g_Lactobacillus.s_Lactobacillus_reuteri         | 7.1762 | 0.9718 | 4.1738 |
|        | g_Lactococcus.s_Lactococcus_lactis              | 0.4708 | 0.6732 | 0.818  |
|        | g_Leuconostoc.s_Leuconostoc_mesenteroides       | 0.5802 | 0.5912 | 0.4038 |
|        | g_Proteus.s_Proteus_mirabilis                   | 0      | 0.1084 | 0      |
|        | g_Staphylococcus.s_Staphylococcus_xylosus       | 1.2674 | 0.6722 | 0      |
|        | g_Streptococcus.s_Streptococcus_thermophilus    | 0.5972 | 0.4878 | 0.5053 |
|        | K02109unclassified                              | 2.44   | 2.0782 | 6.2112 |
| K02113 | ATPF1D, K02113                                  | 39.941 | 22     | 41.433 |
|        | g_Bacteroides.s_Bacteroides_thetaiotaomicron    | 6.598  | 6.902  | 8.981  |
|        | g_Corynebacterium.s_Corynebacterium_glutamicum  | 0.1066 | 1.774  | 2.5025 |
|        | g_Enterococcus.s_Enterococcus_faecalis          | 0      | 0.2818 | 0      |
|        | g_Escherichia.s_Escherichia_coli                | 1.042  | 0.9914 | 0      |
|        | g_Klebsiella.s_Klebsiella_pneumoniae            | 0      | 0.558  | 0      |
|        | g_Lactobacillus.s_Lactobacillus_delbrueckii     | 0.2778 | 0.3982 | 0.298  |
|        | g_Lactobacillus.s_Lactobacillus_helveticus      | 0      | 0.2492 | 0      |
|        | g_Lactobacillus.s_Lactobacillus_johnsonii       | 21.665 | 4.256  | 12.827 |
|        | g_Lactobacillus.s_Lactobacillus_reuteri         | 7.5096 | 1.3952 | 4.9758 |
|        | g_Lactococcus.s_Lactococcus_lactis              | 0.4766 | 0.8266 | 0.8958 |
|        | g_Leuconostoc.s_Leuconostoc_mesenteroides       | 0.2272 | 0.146  | 0.1545 |
|        | g_Proteus.s_Proteus_mirabilis                   | 0.0774 | 0      | 0      |
|        | g_Streptococcus.s_Streptococcus_thermophilus    | 0.4492 | 0.5966 | 1.3185 |
|        | K02113unclassified                              | 1.5122 | 3.625  | 9.4792 |
| K02117 | ATPVA, rK02117                                  | 24.645 | 24.085 | 37.136 |
|        | g_Aerococcus.s_Aerococcus_viridans              | 0.0658 | 1.7388 | 2.2952 |
|        | g_Alistipes.s_Alistipes_shahii                  | 0      | 0.5638 | 0.2003 |
|        | g_Bacteroides.s_Bacteroides_thetaiotaomicron    | 6.8382 | 8.7194 | 10.835 |
|        | g_Enterococcus.s_Enterococcus_faecalis          | 0      | 0.044  | 0      |
|        | g_Parabacteroides.s_Parabacteroides_goldsteinii | 2.4448 | 1.7756 | 4.5965 |
|        | K02117unclassified                              | 15.295 | 11.243 | 19.209 |

|        |            |                                                |        |        |        |
|--------|------------|------------------------------------------------|--------|--------|--------|
| K00240 | sdhB, frdE | K00240                                         | 14.893 | 31.011 | 38.048 |
|        |            | g_Alistipes.s_Alistipes_shahii                 | 0      | 0.4438 | 0.3353 |
|        |            | g_Bacteroides.s_Bacteroides_thetaiotaomicron   | 11.481 | 18.025 | 22.65  |
|        |            | g_Bacteroides.s_Bacteroides_uniformis          | 0      | 5.6666 | 0      |
|        |            | g_Corynebacterium.s_Corynebacterium_glutamicum | 0.0592 | 1.9436 | 2.0935 |
|        |            | g_Escherichia.s_Escherichia_coli               | 0.616  | 0.6276 | 0.0937 |
|        |            | g_Klebsiella.s_Klebsiella_pneumoniae           | 0      | 0.244  | 0      |
|        |            | g_Staphylococcus.s_Staphylococcus_xylosus      | 0.6738 | 0.6344 | 0.412  |
|        |            | K00240unclassified                             | 2.0626 | 3.4252 | 12.463 |
| K02114 | ATPF1E,    | K02114                                         | 34.515 | 9.8572 | 27.06  |
|        |            | g_Corynebacterium.s_Corynebacterium_glutamicum | 0      | 1.8458 | 1.4602 |
|        |            | g_Enterococcus.s_Enterococcus_faecalis         | 0      | 0.1366 | 0      |
|        |            | g_Escherichia.s_Escherichia_coli               | 0      | 0.3678 | 0      |
|        |            | g_Klebsiella.s_Klebsiella_pneumoniae           | 0      | 0.5196 | 0      |
|        |            | g_Lactobacillus.s_Lactobacillus_delbrueckii    | 0.3972 | 0.394  | 0.2052 |
|        |            | g_Lactobacillus.s_Lactobacillus_helveticus     | 0      | 0.2146 | 0      |
|        |            | g_Lactobacillus.s_Lactobacillus_johnsonii      | 23.854 | 3.599  | 15.735 |
|        |            | g_Lactobacillus.s_Lactobacillus_reuteri        | 8.3092 | 1.2308 | 3.3542 |
|        |            | g_Lactococcus.s_Lactococcus_lactis             | 0.364  | 0.8828 | 0.859  |
|        |            | g_Staphylococcus.s_Staphylococcus_xylosus      | 1.3032 | 0.542  | 0.7442 |
|        |            | g_Streptococcus.s_Streptococcus_thermophilus   | 0.2868 | 0.1242 | 0.4093 |
|        |            | K02114unclassified                             | 0      | 0      | 4.2927 |
| K02108 | ATPF0A,    | K02108                                         | 17.512 | 17.507 | 29.142 |
|        |            | g_Enterococcus.s_Enterococcus_faecalis         | 0.1568 | 0      | 0.0458 |
|        |            | g_Enterorhabdus.s_Enterorhabdus_caecimuris     | 1.7894 | 7.8162 | 5.1288 |
|        |            | g_Lactobacillus.s_Lactobacillus_delbrueckii    | 0.445  | 0.6216 | 0.0533 |
|        |            | g_Lactobacillus.s_Lactobacillus_reuteri        | 7.6816 | 1.0696 | 5.6058 |
|        |            | g_Lactococcus.s_Lactococcus_lactis             | 0.9068 | 0.7536 | 0.909  |
|        |            | g_Leuconostoc.s_Leuconostoc_lactis             | 0      | 0      | 0.0922 |
|        |            | g_Proteus.s_Proteus_mirabilis                  | 0      | 0.0516 | 0      |
|        |            | g_Staphylococcus.s_Staphylococcus_xylosus      | 1.0328 | 0.3292 | 0.5708 |
|        |            | K02108unclassified                             | 5.4992 | 6.8648 | 16.737 |
| K00244 | frdA       | K00244                                         | 28.686 | 11.35  | 23.372 |
|        |            | g_Enterorhabdus.s_Enterorhabdus_caecimuris     | 0.0288 | 0      | 0      |
|        |            | g_Escherichia.s_Escherichia_coli               | 0.569  | 0.6034 | 0.0718 |
|        |            | g_Klebsiella.s_Klebsiella_pneumoniae           | 0      | 0.3346 | 0      |
|        |            | g_Lactobacillus.s_Lactobacillus_delbrueckii    | 0.7546 | 0.7106 | 0.0718 |
|        |            | g_Lactobacillus.s_Lactobacillus_helveticus     | 0.041  | 0.226  | 0.0488 |
|        |            | g_Lactobacillus.s_Lactobacillus_johnsonii      | 17.859 | 3.7252 | 12.137 |
|        |            | g_Lactobacillus.s_Lactobacillus_reuteri        | 5.6926 | 1.197  | 3.7872 |
|        |            | g_Lactococcus.s_Lactococcus_lactis             | 0.6842 | 0.4684 | 0.4605 |
|        |            | g_Leuconostoc.s_Leuconostoc_mesenteroides      | 0.0794 | 0.1248 | 0.3245 |
|        |            | g_Proteus.s_Proteus_mirabilis                  | 0      | 0.038  | 0      |
|        |            | K00244unclassified                             | 2.9772 | 3.9218 | 6.4703 |
| K15986 | ppaC       | K15986                                         | 25.384 | 9.2804 | 20.489 |
|        |            | g_Aerococcus.s_Aerococcus_viridans             | 0      | 0.8218 | 0.4442 |
|        |            | g_Enterococcus.s_Enterococcus_faecalis         | 0      | 0.0448 | 0      |
|        |            | g_Lactobacillus.s_Lactobacillus_delbrueckii    | 0.2746 | 0.4456 | 0      |
|        |            | g_Lactobacillus.s_Lactobacillus_helveticus     | 0.0358 | 0.2494 | 0      |
|        |            | g_Lactobacillus.s_Lactobacillus_johnsonii      | 17.373 | 3.308  | 12.447 |
|        |            | g_Lactobacillus.s_Lactobacillus_reuteri        | 5.2754 | 1.3756 | 3.8095 |
|        |            | g_Lactococcus.s_Lactococcus_lactis             | 0.7232 | 1.1456 | 0.5972 |
|        |            | g_Staphylococcus.s_Staphylococcus_xylosus      | 0.5902 | 0.5422 | 0.6088 |
|        |            | g_Streptococcus.s_Streptococcus_thermophilus   | 0.3316 | 0.5948 | 0.4992 |
|        |            | K15986unclassified                             | 0.7794 | 0.7522 | 2.0835 |
| K02121 | ATPVE,     | nK02121                                        | 12.784 | 17.628 | 21.166 |
|        |            | g_Aerococcus.s_Aerococcus_viridans             | 0      | 0.922  | 1.8152 |
|        |            | g_Bacteroides.s_Bacteroides_thetaiotaomicron   | 7.3076 | 9.8224 | 10.267 |

|        |            |                                                 |        |        |        |
|--------|------------|-------------------------------------------------|--------|--------|--------|
|        |            | K02121unclassified                              | 5.4766 | 6.8834 | 9.0835 |
| K00330 | nuoA       | K00330                                          | 11.483 | 16.562 | 21.477 |
|        |            | g_Alistipes.s_Alistipes_shahii                  | 0      | 0.1374 | 0.1483 |
|        |            | g_Bacteroides.s_Bacteroides_thetaiotaomicron    | 10.893 | 15.332 | 19.738 |
|        |            | g_Escherichia.s_Escherichia_coli                | 0.3934 | 0.9266 | 0.0902 |
|        |            | g_Klebsiella.s_Klebsiella_pneumoniae            | 0      | 0.1654 | 0      |
|        |            | g_Proteus.s_Proteus_mirabilis                   | 0.1962 | 0      | 0      |
|        |            | K00330unclassified                              | 0      | 0      | 1.5007 |
| K00239 | sdhA, frdA | K00239                                          | 7.0002 | 7.6212 | 31.44  |
|        |            | g_Alistipes.s_Alistipes_shahii                  | 0      | 0.571  | 0.2583 |
|        |            | g_Escherichia.s_Escherichia_coli                | 0.0348 | 0      | 0      |
|        |            | g_Klebsiella.s_Klebsiella_pneumoniae            | 0      | 0.2056 | 0      |
|        |            | g_Staphylococcus.s_Staphylococcus_xylosus       | 1.3136 | 0.7782 | 0.3828 |
|        |            | K00239unclassified                              | 5.6518 | 6.0658 | 30.799 |
| K00340 | nuoK       | K00340                                          | 9.349  | 16.692 | 21.466 |
|        |            | g_Alistipes.s_Alistipes_shahii                  | 0      | 0      | 0.3968 |
|        |            | g_Bacteroides.s_Bacteroides_thetaiotaomicron    | 7.8202 | 16.465 | 21.069 |
|        |            | g_Escherichia.s_Escherichia_coli                | 1.5288 | 0.2268 | 0      |
| K00339 | nuoJ       | K00339                                          | 11.223 | 14.965 | 18.12  |
|        |            | g_Alistipes.s_Alistipes_shahii                  | 0      | 0.7142 | 0.6313 |
|        |            | g_Bacteroides.s_Bacteroides_thetaiotaomicron    | 7.626  | 10.186 | 12.264 |
|        |            | g_Escherichia.s_Escherichia_coli                | 0.7986 | 0.3922 | 0      |
|        |            | g_Klebsiella.s_Klebsiella_pneumoniae            | 0      | 0.1822 | 0      |
|        |            | K00339unclassified                              | 2.7986 | 3.4896 | 5.2243 |
| K00331 | nuoB       | K00331                                          | 9.289  | 21.161 | 12.784 |
|        |            | g_Alistipes.s_Alistipes_shahii                  | 0      | 0.178  | 0.06   |
|        |            | g_Bacteroides.s_Bacteroides_thetaiotaomicron    | 7.1394 | 11.389 | 9.3475 |
|        |            | g_Bacteroides.s_Bacteroides_uniformis           | 0      | 7.6802 | 0      |
|        |            | g_Escherichia.s_Escherichia_coli                | 0.4048 | 0.4534 | 0.235  |
|        |            | g_Klebsiella.s_Klebsiella_pneumoniae            | 0      | 0.127  | 0      |
|        |            | g_Proteus.s_Proteus_mirabilis                   | 0.0568 | 0.0528 | 0      |
|        |            | K00331unclassified                              | 1.688  | 1.2814 | 3.1417 |
| K02124 | ATPVK, r   | K02124                                          | 13.82  | 12.57  | 15.205 |
|        |            | g_Aerococcus.s_Aerococcus_viridans              | 0      | 0.6324 | 1.6078 |
|        |            | g_Parabacteroides.s_Parabacteroides_goldsteinii | 2.6336 | 2.1766 | 5.8732 |
|        |            | K02124unclassified                              | 11.187 | 9.7606 | 7.7238 |
| K00342 | nuoM       | K00342                                          | 10.087 | 11.312 | 18.588 |
|        |            | g_Bacteroides.s_Bacteroides_thetaiotaomicron    | 6.9424 | 7.6446 | 9.4178 |
|        |            | g_Escherichia.s_Escherichia_coli                | 0.7314 | 0.7548 | 0.0622 |
|        |            | g_Klebsiella.s_Klebsiella_pneumoniae            | 0      | 0.166  | 0      |
|        |            | g_Proteus.s_Proteus_mirabilis                   | 0.0216 | 0.02   | 0      |
|        |            | K00342unclassified                              | 2.3912 | 2.7272 | 9.108  |
| K00337 | nuoH       | K00337                                          | 9.1102 | 14.143 | 16.906 |
|        |            | g_Alistipes.s_Alistipes_shahii                  | 0      | 0.817  | 0.0897 |
|        |            | g_Bacteroides.s_Bacteroides_thetaiotaomicron    | 5.5014 | 9.6448 | 10.338 |
|        |            | g_Escherichia.s_Escherichia_coli                | 0.2348 | 0.2304 | 0.0642 |
|        |            | g_Klebsiella.s_Klebsiella_pneumoniae            | 0      | 0.2964 | 0      |
|        |            | g_Proteus.s_Proteus_mirabilis                   | 0.18   | 0      | 0      |
|        |            | K00337unclassified                              | 3.1942 | 3.154  | 6.4143 |
| K00338 | nuoI       | K00338                                          | 9.5344 | 14.411 | 15.688 |
|        |            | g_Bacteroides.s_Bacteroides_thetaiotaomicron    | 6.8838 | 9.0748 | 10.831 |
|        |            | g_Escherichia.s_Escherichia_coli                | 0.2892 | 0.6836 | 0      |
|        |            | g_Klebsiella.s_Klebsiella_pneumoniae            | 0      | 0.4042 | 0      |
|        |            | K00338unclassified                              | 2.3616 | 4.248  | 4.8568 |
| K13378 | nuoCD      | K13378                                          | 8.3176 | 13.32  | 15.843 |
|        |            | g_Bacteroides.s_Bacteroides_thetaiotaomicron    | 5.6746 | 8.326  | 9.0477 |
|        |            | g_Escherichia.s_Escherichia_coli                | 0.053  | 0.1586 | 0      |
|        |            | g_Klebsiella.s_Klebsiella_pneumoniae            | 0      | 0.494  | 0      |

|             |         |                                                       |        |        |        |
|-------------|---------|-------------------------------------------------------|--------|--------|--------|
|             |         | K13378unclassified                                    | 2.59   | 4.3412 | 6.7952 |
| K02126      | ATPeF0A | K02126                                                | 13.652 | 14.017 | 10.219 |
|             |         | K02126unclassified                                    | 13.652 | 14.017 | 10.219 |
| K00425      | cydA    | K00425                                                | 12.253 | 11.262 | 11.144 |
|             |         | <i>g_Enterorhabdus.s_Enterorhabdus_caecimuris</i>     | 1.662  | 4.5306 | 3.7342 |
|             |         | <i>g_Escherichia.s_Escherichia_coli</i>               | 1.106  | 0.8438 | 0.0765 |
|             |         | <i>g_Klebsiella.s_Klebsiella_pneumoniae</i>           | 0      | 0.8786 | 0      |
|             |         | <i>g_Lactobacillus.s_Lactobacillus_reuteri</i>        | 7.1802 | 1.1582 | 3.7757 |
|             |         | <i>g_Lactococcus.s_Lactococcus_lactis</i>             | 0.3908 | 0.6694 | 0.9513 |
|             |         | <i>g_Leuconostoc.s_Leuconostoc_mesenteroides</i>      | 0.1292 | 0.1716 | 0.2077 |
|             |         | <i>g_Proteus.s_Proteus_mirabilis</i>                  | 0.0252 | 0.1446 | 0      |
|             |         | <i>g_Staphylococcus.s_Staphylococcus_xylosus</i>      | 0.7954 | 0.4752 | 0.3827 |
|             |         | K00425unclassified                                    | 0.9644 | 2.3902 | 2.0162 |
| K00343      | nuoN    | K00343                                                | 8.349  | 12.201 | 13.427 |
|             |         | <i>g_Bacteroides.s_Bacteroides_thetaiotaomicron</i>   | 6.019  | 8.0784 | 8.931  |
|             |         | <i>g_Escherichia.s_Escherichia_coli</i>               | 0.0866 | 0.1562 | 0.0203 |
|             |         | <i>g_Klebsiella.s_Klebsiella_pneumoniae</i>           | 0      | 0.4044 | 0      |
|             |         | <i>g_Proteus.s_Proteus_mirabilis</i>                  | 0      | 0.0528 | 0      |
|             |         | K00343unclassified                                    | 2.2432 | 3.5086 | 4.4757 |
| K01507      | ppa     | K01507                                                | 8.1554 | 9.5068 | 13.061 |
|             |         | <i>g_Corynebacterium.s_Corynebacterium_glutamicum</i> | 0      | 1.3594 | 2.7235 |
|             |         | <i>g_Deбaryomyces.s_Deбaryomyces_hansenii</i>         | 6.4774 | 4.6446 | 2.4105 |
|             |         | <i>g_Escherichia.s_Escherichia_coli</i>               | 0.308  | 0.9144 | 0      |
|             |         | <i>g_Lactococcus.s_Lactococcus_lactis</i>             | 0.5886 | 0.1774 | 0      |
|             |         | <i>g_Proteus.s_Proteus_mirabilis</i>                  | 0.0788 | 0      | 0      |
|             |         | K01507unclassified                                    | 0.7028 | 2.4112 | 7.9267 |
| K00426      | cydB    | K00426                                                | 9.8896 | 5.7154 | 12.992 |
|             |         | <i>g_Corynebacterium.s_Corynebacterium_glutamicum</i> | 0.0448 | 0.9816 | 2.1815 |
|             |         | <i>g_Escherichia.s_Escherichia_coli</i>               | 0.0888 | 0.1878 | 0      |
|             |         | <i>g_Klebsiella.s_Klebsiella_pneumoniae</i>           | 0      | 0.2312 | 0      |
|             |         | <i>g_Lactobacillus.s_Lactobacillus_reuteri</i>        | 6.606  | 1.6418 | 4.3112 |
|             |         | <i>g_Lactococcus.s_Lactococcus_lactis</i>             | 0.2194 | 0.4238 | 0.7577 |
|             |         | <i>g_Proteus.s_Proteus_mirabilis</i>                  | 0.0296 | 0.1546 | 0      |
|             |         | <i>g_Staphylococcus.s_Staphylococcus_lentus</i>       | 0.9858 | 0      | 0.9058 |
|             |         | <i>g_Staphylococcus.s_Staphylococcus_xylosus</i>      | 0.6318 | 0.2594 | 0.471  |
|             |         | K00426unclassified                                    | 1.2834 | 1.8352 | 4.3652 |
| K03885      | ndh     | K03885                                                | 9.7486 | 4.6112 | 13.479 |
|             |         | <i>g_Corynebacterium.s_Corynebacterium_glutamicum</i> | 0.144  | 1.087  | 1.7922 |
|             |         | <i>g_Escherichia.s_Escherichia_coli</i>               | 0.3572 | 0.4914 | 0      |
|             |         | <i>g_Klebsiella.s_Klebsiella_pneumoniae</i>           | 0      | 0.2026 | 0      |
|             |         | <i>g_Lactobacillus.s_Lactobacillus_reuteri</i>        | 7.2792 | 1.087  | 3.724  |
|             |         | <i>g_Lactococcus.s_Lactococcus_lactis</i>             | 0.3864 | 0.3262 | 0.3235 |
|             |         | <i>g_Lactococcus.s_Lactococcus_raffinolactis</i>      | 0.0154 | 0.0382 | 0.1258 |
|             |         | <i>g_Proteus.s_Proteus_mirabilis</i>                  | 0.0258 | 0.0302 | 0      |
|             |         | <i>g_Staphylococcus.s_Staphylococcus_xylosus</i>      | 1.0522 | 0.7596 | 0.4972 |
|             |         | K03885unclassified                                    | 0.4884 | 0.589  | 7.0158 |
| K00937      | ppk     | K00937                                                | 7.076  | 11.323 | 9.7553 |
|             |         | <i>g_Aerococcus.s_Aerococcus_viridans</i>             | 0.0354 | 0.9894 | 0.5393 |
|             |         | <i>g_Klebsiella.s_Klebsiella_pneumoniae</i>           | 0      | 0.5552 | 0      |
|             |         | <i>g_Lactobacillus.s_Lactobacillus_delbrueckii</i>    | 0.1584 | 0.307  | 0.1805 |
|             |         | K00937unclassified                                    | 6.8818 | 9.4706 | 9.0357 |
| K03883      | ND5     | K03883                                                | 10.686 | 8.6272 | 5.9955 |
|             |         | K03883unclassified                                    | 10.686 | 8.6272 | 5.9955 |
| map00190_   | K02128  | ATPeF0C.K02128                                        | 7.9892 | 9.6284 | 6.3762 |
| Oxidative   |         | K02128unclassified                                    | 7.9892 | 9.6284 | 6.3762 |
| phosphoryla | K02120  | ATPVD, rK02120                                        | 5.014  | 4.9238 | 12.219 |
| tion        |         | <i>g_Aerococcus.s_Aerococcus_viridans</i>             | 0      | 1.6714 | 1.9662 |
|             |         | <i>g_Alistipes.s_Alistipes_shahii</i>                 | 0      | 0.2414 | 0.1953 |

|        |           |                                                |        |        |        |
|--------|-----------|------------------------------------------------|--------|--------|--------|
|        |           | g_Enterococcus.s_Enterococcus_faecalis         | 0      | 0      | 0.0547 |
|        |           | K02120unclassified                             | 5.014  | 3.0114 | 10.003 |
| K02257 | COX10, c  | K02257                                         | 5.8074 | 5.878  | 9.3303 |
|        |           | g_Corynebacterium.s_Corynebacterium_glutamicum | 0.0864 | 1.332  | 2.2377 |
|        |           | g_Deбaryomyces.s_Deбaryomyces_hansenii         | 3.4132 | 2.0548 | 1.3235 |
|        |           | g_Escherichia.s_Escherichia_coli               | 0.5316 | 0.612  | 0.036  |
|        |           | g_Klebsiella.s_Klebsiella_pneumoniae           | 0      | 0.335  | 0      |
|        |           | g_Staphylococcus.s_Staphylococcus_xylosus      | 1.3784 | 0.6194 | 0.1567 |
|        |           | K02257unclassified                             | 0.398  | 0.925  | 5.5768 |
| K03881 | ND4       | K03881                                         | 7.8964 | 6.4352 | 5.1072 |
|        |           | K03881unclassified                             | 7.8964 | 6.4352 | 5.1072 |
| K03880 | ND3       | K03880                                         | 7.5052 | 4.9704 | 4.5932 |
|        |           | K03880unclassified                             | 7.5052 | 4.9704 | 4.5932 |
| K22468 | ppk2      | K22468                                         | 1.1806 | 4.4204 | 9.4632 |
|        |           | g_Corynebacterium.s_Corynebacterium_glutamicum | 0.1738 | 3.833  | 4.6855 |
|        |           | g_Klebsiella.s_Klebsiella_pneumoniae           | 0      | 0.0522 | 0      |
|        |           | K22468unclassified                             | 1.0068 | 0.5354 | 4.7777 |
| K02261 | COX2      | K02261                                         | 7.1492 | 5.3382 | 2.7168 |
|        |           | K02261unclassified                             | 7.1492 | 5.3382 | 2.7168 |
| K03955 | NDUFAB    | K03955                                         | 5.497  | 4.8882 | 4.2598 |
|        |           | g_Deбaryomyces.s_Deбaryomyces_hansenii         | 5.497  | 4.8882 | 4.0805 |
|        |           | K03955unclassified                             | 0      | 0      | 0.1793 |
| K03879 | ND2       | K03879                                         | 8.5194 | 4.3878 | 1.899  |
|        |           | K03879unclassified                             | 8.5194 | 4.3878 | 1.899  |
| K02256 | COX1      | K02256                                         | 5.817  | 5.6252 | 2.7392 |
|        |           | K02256unclassified                             | 5.817  | 5.6252 | 2.7392 |
| K02259 | COX15, c  | K02259                                         | 4.1624 | 3.3678 | 5.5392 |
|        |           | g_Corynebacterium.s_Corynebacterium_glutamicum | 0      | 1.0748 | 2.2192 |
|        |           | g_Deбaryomyces.s_Deбaryomyces_hansenii         | 2.8108 | 1.9322 | 0.746  |
|        |           | g_Staphylococcus.s_Staphylococcus_xylosus      | 0.8134 | 0.3608 | 0.4335 |
|        |           | K02259unclassified                             | 0.5384 | 0      | 2.1407 |
| K03889 | qcrC      | K03889                                         | 0.1518 | 2.159  | 9.7372 |
|        |           | g_Corynebacterium.s_Corynebacterium_glutamicum | 0.1518 | 1.298  | 2.2353 |
|        |           | K03889unclassified                             | 0      | 0.8608 | 7.5017 |
| K02275 | coxB, cta | K02275                                         | 0.0382 | 1.6534 | 9.972  |
|        |           | g_Corynebacterium.s_Corynebacterium_glutamicum | 0.0382 | 1.0304 | 2.6683 |
|        |           | K02275unclassified                             | 0      | 0.6228 | 7.3035 |
| K02276 | coxC, cta | K02276                                         | 0      | 2.2432 | 9.4893 |
|        |           | g_Corynebacterium.s_Corynebacterium_glutamicum | 0      | 1.3666 | 1.5575 |
|        |           | K02276unclassified                             | 0      | 0.8768 | 7.9318 |
| K02155 | ATPeV0    | K02155                                         | 6.3264 | 4.207  | 2.1213 |
|        |           | g_Deбaryomyces.s_Deбaryomyces_hansenii         | 6.3264 | 4.207  | 2.1213 |
| K03891 | qcrB      | K03891                                         | 0.299  | 2.17   | 7.9353 |
|        |           | g_Corynebacterium.s_Corynebacterium_glutamicum | 0.0726 | 1.0768 | 2.1918 |
|        |           | K03891unclassified                             | 0.2264 | 1.0932 | 5.7435 |
| K02274 | coxA, cta | K02274                                         | 0.0974 | 1.8744 | 8.3382 |
|        |           | g_Corynebacterium.s_Corynebacterium_glutamicum | 0.0974 | 1.2426 | 2.7447 |
|        |           | K02274unclassified                             | 0      | 0.6316 | 5.5933 |
| K03882 | ND4L      | K03882                                         | 5.2786 | 5.4538 | 0.9842 |
|        |           | K03882unclassified                             | 5.2786 | 5.4538 | 0.9842 |
| K00237 | SDHD, SIK | K00237                                         | 5.01   | 3.9836 | 2.3243 |
|        |           | g_Deбaryomyces.s_Deбaryomyces_hansenii         | 5.01   | 3.9836 | 2.3243 |
| K03890 | qcrA      | K03890                                         | 0.132  | 2.3752 | 7.5955 |
|        |           | g_Corynebacterium.s_Corynebacterium_glutamicum | 0.132  | 1.4558 | 2.2765 |
|        |           | K03890unclassified                             | 0      | 0.9194 | 5.3193 |
| K02122 | ATPVF, n  | K02122                                         | 2.5832 | 3.1268 | 3.9758 |
|        |           | g_Aerococcus.s_Aerococcus_viridans             | 0      | 2.1178 | 3.165  |
|        |           | K02122unclassified                             | 2.5832 | 1.009  | 0.8108 |

|        |                                             |  |        |        |        |
|--------|---------------------------------------------|--|--------|--------|--------|
| K02149 | ATPeV1DK02149                               |  | 3.1544 | 3.1062 | 2.8232 |
|        | g__Debaryomyces.s__Debaryomyces_hansenii    |  | 2.9708 | 2.1482 | 1.7097 |
|        | K02149unclassified                          |  | 0.1834 | 0.9578 | 1.1135 |
| K02267 | COX6B K02267                                |  | 2.359  | 3.84   | 2.2417 |
|        | g__Debaryomyces.s__Debaryomyces_hansenii    |  | 2.0142 | 2.8986 | 1.4113 |
|        | K02267unclassified                          |  | 0.3446 | 0.9416 | 0.8303 |
| K00411 | UQCRFS1K00411                               |  | 5.1802 | 2.1064 | 1.1987 |
|        | g__Debaryomyces.s__Debaryomyces_hansenii    |  | 2.762  | 2.1064 | 0.7528 |
|        | K00411unclassified                          |  | 2.4182 | 0      | 0.4458 |
| K03941 | NDUFS8 K03941                               |  | 4.802  | 2.7842 | 0.894  |
|        | g__Debaryomyces.s__Debaryomyces_hansenii    |  | 4.5554 | 2.2798 | 0.6385 |
|        | K03941unclassified                          |  | 0.2468 | 0.5046 | 0.2555 |
| K02143 | ATPeFK, K02143                              |  | 4.82   | 2.8672 | 0.7398 |
|        | g__Debaryomyces.s__Debaryomyces_hansenii    |  | 4.82   | 2.8672 | 0.5447 |
|        | K02143unclassified                          |  | 0      | 0      | 0.1952 |
| K02269 | COX7 K02269                                 |  | 1.812  | 4.554  | 1.4372 |
|        | g__Debaryomyces.s__Debaryomyces_hansenii    |  | 1.812  | 4.554  | 1.4372 |
| K03939 | NDUFS6 K03939                               |  | 2.8504 | 2.0074 | 2.692  |
|        | g__Debaryomyces.s__Debaryomyces_hansenii    |  | 2.8504 | 2.0074 | 2.692  |
| K03942 | NDUFV1 K03942                               |  | 2.8384 | 2.7506 | 2.0825 |
|        | g__Debaryomyces.s__Debaryomyces_hansenii    |  | 2.8384 | 2.053  | 1.1425 |
|        | K03942unclassified                          |  | 0      | 0.6976 | 0.94   |
| K00419 | QCR9, UCK00419                              |  | 3.8724 | 3.986  | 0      |
|        | g__Debaryomyces.s__Debaryomyces_hansenii    |  | 3.8724 | 3.986  | 0      |
| K00241 | sdhC, frdCK00241                            |  | 2.3262 | 1.5492 | 3.1307 |
|        | g__Escherichia.s__Escherichia_coli          |  | 0.906  | 0.349  | 0      |
|        | g__Klebsiella.s__Klebsiella_pneumoniae      |  | 0      | 0.469  | 0      |
|        | g__Staphylococcus.s__Staphylococcus_xylosum |  | 1.2466 | 0.335  | 0.3593 |
|        | K00241unclassified                          |  | 0.1734 | 0.3962 | 2.7713 |
| K00418 | QCR8, UCK00418                              |  | 3.4894 | 3.5712 | 0.4478 |
|        | g__Debaryomyces.s__Debaryomyces_hansenii    |  | 3.4894 | 3.5712 | 0.4478 |
| K03878 | ND1 K03878                                  |  | 1.6982 | 3.0762 | 2.3197 |
|        | K03878unclassified                          |  | 1.6982 | 3.0762 | 2.3197 |
| K03935 | NDUFS2 K03935                               |  | 2.7368 | 3.2056 | 1.3448 |
|        | g__Debaryomyces.s__Debaryomyces_hansenii    |  | 2.7368 | 2.455  | 0.8578 |
|        | K03935unclassified                          |  | 0      | 0.7504 | 0.487  |
| K02262 | COX3 K02262                                 |  | 3.7226 | 3.151  | 0.5518 |
|        | K02262unclassified                          |  | 3.7226 | 3.151  | 0.5518 |
| K00413 | CYC1, CYK00413                              |  | 2.8294 | 2.4348 | 1.6525 |
|        | g__Debaryomyces.s__Debaryomyces_hansenii    |  | 2.8294 | 1.9108 | 1.0755 |
|        | K00413unclassified                          |  | 0      | 0.5242 | 0.577  |
| K02263 | COX4 K02263                                 |  | 3.6022 | 2.5018 | 0.9483 |
|        | g__Debaryomyces.s__Debaryomyces_hansenii    |  | 3.6022 | 2.5018 | 0.9483 |
| K00236 | SDHC, SIK00236                              |  | 3.4588 | 1.9454 | 1.5168 |
|        | g__Debaryomyces.s__Debaryomyces_hansenii    |  | 3.4588 | 1.9454 | 1.5168 |
| K02127 | ATPeF0B, K02127                             |  | 2.9488 | 2.6808 | 1.3285 |
|        | g__Debaryomyces.s__Debaryomyces_hansenii    |  | 2.9488 | 2.6808 | 1.3285 |
| K02150 | ATPeV1E, K02150                             |  | 3.0332 | 2.6324 | 1.2903 |
|        | g__Debaryomyces.s__Debaryomyces_hansenii    |  | 3.0332 | 2.6324 | 1.2903 |
| K02135 | ATPeF1E, K02135                             |  | 1.1408 | 3.2318 | 2.3235 |
|        | g__Debaryomyces.s__Debaryomyces_hansenii    |  | 0.8774 | 3.2318 | 2.3235 |
|        | K02135unclassified                          |  | 0.2634 | 0      | 0      |
| K03936 | NDUFS3 K03936                               |  | 3.2094 | 2.2844 | 1.2512 |
|        | g__Debaryomyces.s__Debaryomyces_hansenii    |  | 3.2094 | 2.2844 | 0.8843 |
|        | K03936unclassified                          |  | 0      | 0      | 0.3667 |
| K03938 | NDUFS5 K03938                               |  | 3.021  | 2.475  | 1.2122 |
|        | g__Debaryomyces.s__Debaryomyces_hansenii    |  | 3.021  | 2.475  | 1.2122 |
| K02134 | ATPeF1D, K02134                             |  | 2.1764 | 2.9792 | 1.4615 |

|        |                |                                                 |        |        |        |
|--------|----------------|-------------------------------------------------|--------|--------|--------|
|        |                | <i>g_Debaryomyces.s_Debaryomyces_hansenii</i>   | 2.0878 | 2.1112 | 0.6615 |
|        |                | <i>g_Meyerozyma.s_Meyerozyma_guilliermondii</i> | 0.0886 | 0      | 0      |
|        |                | K02134unclassified                              | 0      | 0.868  | 0.8    |
| K03887 | MQCRB, K03887  |                                                 | 1.1944 | 0.25   | 4.5057 |
|        |                | <i>g_Staphylococcus.s_Staphylococcus_lentus</i> | 1.1944 | 0.25   | 4.009  |
|        |                | K03887unclassified                              | 0      | 0      | 0.4967 |
| K02147 | ATPeV1BK02147  |                                                 | 2.745  | 2.5118 | 1.3228 |
|        |                | <i>g_Debaryomyces.s_Debaryomyces_hansenii</i>   | 2.745  | 2.236  | 0.8182 |
|        |                | K02147unclassified                              | 0      | 0.2758 | 0.5047 |
| K03963 | NDUFB7 K03963  |                                                 | 4.186  | 2.163  | 0.2508 |
|        |                | <i>g_Debaryomyces.s_Debaryomyces_hansenii</i>   | 4.186  | 2.163  | 0.2508 |
| K02266 | COX6A K02266   |                                                 | 3.7784 | 1.5586 | 1.0907 |
|        |                | <i>g_Debaryomyces.s_Debaryomyces_hansenii</i>   | 3.7784 | 1.5586 | 1.0907 |
| K02137 | ATPeF00 K02137 |                                                 | 3.0164 | 2.326  | 0.972  |
|        |                | <i>g_Debaryomyces.s_Debaryomyces_hansenii</i>   | 3.0164 | 2.326  | 0.972  |
| K02138 | ATPeF0D K02138 |                                                 | 3.0308 | 2.265  | 1.0072 |
|        |                | <i>g_Debaryomyces.s_Debaryomyces_hansenii</i>   | 3.0308 | 2.265  | 1.0072 |
| K02140 | ATPeFG, K02140 |                                                 | 4.5146 | 1.2242 | 0.6285 |
|        |                | <i>g_Debaryomyces.s_Debaryomyces_hansenii</i>   | 4.5146 | 1.2242 | 0.6285 |
| K02148 | ATPeV1CK02148  |                                                 | 3.006  | 2.4582 | 0.8215 |
|        |                | <i>g_Debaryomyces.s_Debaryomyces_hansenii</i>   | 2.9754 | 2.4582 | 0.8215 |
|        |                | <i>g_Meyerozyma.s_Meyerozyma_guilliermondii</i> | 0.0308 | 0      | 0      |
| K02272 | COX7C K02272   |                                                 | 3.4112 | 1.6068 | 1.1728 |
|        |                | <i>g_Debaryomyces.s_Debaryomyces_hansenii</i>   | 3.4112 | 1.6068 | 1.1728 |
| K02146 | ATPeV0DK02146  |                                                 | 3.2566 | 2.02   | 0.9553 |
|        |                | <i>g_Debaryomyces.s_Debaryomyces_hansenii</i>   | 3.2566 | 2.02   | 0.9553 |
| K00415 | QCR2, UCK00415 |                                                 | 2.5896 | 2.321  | 1.2477 |
|        |                | <i>g_Debaryomyces.s_Debaryomyces_hansenii</i>   | 2.5896 | 2.321  | 1.2477 |
| K03953 | NDUFA9 K03953  |                                                 | 2.7724 | 2.3814 | 1.023  |
|        |                | <i>g_Debaryomyces.s_Debaryomyces_hansenii</i>   | 2.7724 | 2.3814 | 1.023  |
| K03943 | NDUFV2 K03943  |                                                 | 3.0012 | 2.1646 | 0.9875 |
|        |                | <i>g_Debaryomyces.s_Debaryomyces_hansenii</i>   | 3.0012 | 2.1646 | 0.9875 |
| K03940 | NDUFS7 K03940  |                                                 | 2.7288 | 2.1022 | 1.209  |
|        |                | <i>g_Debaryomyces.s_Debaryomyces_hansenii</i>   | 2.6514 | 2.1022 | 0.9868 |
| K02154 | ATPeV0AK02154  |                                                 | 2.9594 | 2.1198 | 0.9692 |
|        |                | <i>g_Debaryomyces.s_Debaryomyces_hansenii</i>   | 2.946  | 2.1198 | 0.9692 |
|        |                | <i>g_Meyerozyma.s_Meyerozyma_guilliermondii</i> | 0.0134 | 0      | 0      |
| K03949 | NDUFA5 K03949  |                                                 | 3.3106 | 1.6442 | 1.0522 |
|        |                | <i>g_Debaryomyces.s_Debaryomyces_hansenii</i>   | 3.3106 | 1.6442 | 1.0522 |
| K00414 | QCRI, UCK00414 |                                                 | 2.7292 | 2.0032 | 1.1857 |
|        |                | <i>g_Debaryomyces.s_Debaryomyces_hansenii</i>   | 2.7292 | 2.0032 | 1.1857 |
| K03661 | ATPeV0BK03661  |                                                 | 3.1254 | 2.0244 | 0.8338 |
|        |                | <i>g_Debaryomyces.s_Debaryomyces_hansenii</i>   | 3.1254 | 2.0244 | 0.8338 |
| K02145 | ATPeV1AK02145  |                                                 | 2.8368 | 1.83   | 1.2198 |
|        |                | <i>g_Debaryomyces.s_Debaryomyces_hansenii</i>   | 2.8368 | 1.83   | 1.2198 |
| K00336 | nuoG K00336    |                                                 | 0.5272 | 1.7442 | 3.194  |
|        |                | <i>g_Escherichia.s_Escherichia_coli</i>         | 0.2192 | 0.2312 | 0      |
|        |                | K00336unclassified                              | 0.308  | 1.513  | 3.194  |
| K02258 | COX11, cK02258 |                                                 | 2.588  | 2.0286 | 1.202  |
|        |                | <i>g_Debaryomyces.s_Debaryomyces_hansenii</i>   | 2.588  | 2.0286 | 1.202  |
| K02152 | ATPeV1GK02152  |                                                 | 1.591  | 3.0038 | 1.1972 |
|        |                | <i>g_Debaryomyces.s_Debaryomyces_hansenii</i>   | 1.591  | 3.0038 | 1.1972 |
| K00245 | frdB K00245    |                                                 | 4.704  | 1.2588 | 0.0453 |
|        |                | <i>g_Escherichia.s_Escherichia_coli</i>         | 0.9732 | 0.7312 | 0.0453 |
|        |                | <i>g_Klebsiella.s_Klebsiella_pneumoniae</i>     | 0      | 0.5278 | 0      |
|        |                | <i>g_Proteus.s_Proteus_mirabilis</i>            | 0.1014 | 0      | 0      |
|        |                | K00245unclassified                              | 3.6296 | 0      | 0      |
| K02151 | ATPeV1F K02151 |                                                 | 1.84   | 2.1896 | 1.616  |



|        |           |                                            |        |        |        |
|--------|-----------|--------------------------------------------|--------|--------|--------|
|        |           | g__Debaryomyces.s__Debaryomyces_hansenii   | 1.84   | 2.1896 | 1.4198 |
|        |           | K02151unclassified                         | 0      | 0      | 0.1962 |
| K02136 | ATPeF1G   | K02136                                     | 2.7472 | 1.9456 | 1.0023 |
|        |           | g__Debaryomyces.s__Debaryomyces_hansenii   | 2.7472 | 1.9456 | 1.0023 |
| K01549 | TIM11, A  | K01549                                     | 2.7822 | 2.114  | 0.825  |
|        |           | g__Debaryomyces.s__Debaryomyces_hansenii   | 2.7822 | 2.114  | 0.825  |
| K02141 | ATPeFH,   | K02141                                     | 2.8446 | 1.8244 | 1.0022 |
|        |           | g__Debaryomyces.s__Debaryomyces_hansenii   | 2.8446 | 1.8244 | 1.0022 |
| K03965 | NDUFB9    | K03965                                     | 2.5476 | 2.881  | 0.3008 |
|        |           | g__Debaryomyces.s__Debaryomyces_hansenii   | 2.5476 | 2.881  | 0.3008 |
| K00341 | nuoL      | K00341                                     | 1.0742 | 2.1974 | 2.0527 |
|        |           | g__Alistipes.s__Alistipes_shahii           | 0      | 0.5184 | 0.325  |
|        |           | g__Klebsiella.s__Klebsiella_pneumoniae     | 0      | 0.2392 | 0      |
|        |           | K00341unclassified                         | 1.0742 | 1.4396 | 1.7277 |
| K02123 | ATPVI, nt | K02123                                     | 0.0522 | 2.2782 | 2.7877 |
|        |           | g__Aerococcus.s__Aerococcus_viridans       | 0.0196 | 1.7618 | 2.3947 |
|        |           | g__Enterococcus.s__Enterococcus_faecalis   | 0.0326 | 0.0202 | 0.0145 |
|        |           | K02123unclassified                         | 0      | 0.496  | 0.3785 |
| K03950 | NDUFA6    | K03950                                     | 3.5824 | 1.7746 | 0.2605 |
|        |           | g__Debaryomyces.s__Debaryomyces_hansenii   | 3.5824 | 1.7746 | 0.2605 |
| K02265 | COX5B     | K02265                                     | 2.529  | 1.9158 | 0.9755 |
|        |           | g__Debaryomyces.s__Debaryomyces_hansenii   | 2.529  | 1.9158 | 0.9755 |
| K00235 | SDHB, SI  | K00235                                     | 2.9118 | 1.8726 | 0.684  |
|        |           | g__Debaryomyces.s__Debaryomyces_hansenii   | 2.9118 | 1.8726 | 0.684  |
| K03964 | NDUFB8    | K03964                                     | 2.6328 | 2.0486 | 0.5122 |
|        |           | g__Debaryomyces.s__Debaryomyces_hansenii   | 2.6328 | 2.0486 | 0.5122 |
| K00335 | nuoF      | K00335                                     | 1.7178 | 2.8276 | 0.5363 |
|        |           | g__Escherichia.s__Escherichia_coli         | 0.7294 | 0.6608 | 0.0223 |
|        |           | g__Klebsiella.s__Klebsiella_pneumoniae     | 0      | 0.3326 | 0      |
|        |           | g__Proteus.s__Proteus_mirabilis            | 0.0246 | 0      | 0      |
|        |           | K00335unclassified                         | 0.964  | 1.8338 | 0.514  |
| K02132 | ATPeF1A   | K02132                                     | 2.2898 | 1.9126 | 0.7657 |
|        |           | g__Debaryomyces.s__Debaryomyces_hansenii   | 2.241  | 1.9126 | 0.7657 |
|        |           | g__Meyerozyma.s__Meyerozyma_guilliermondii | 0.0488 | 0      | 0      |
| K02264 | COX5A     | K02264                                     | 1.6458 | 2.0052 | 1.0787 |
|        |           | g__Debaryomyces.s__Debaryomyces_hansenii   | 1.6458 | 1.0776 | 0.6758 |
|        |           | K02264unclassified                         | 0      | 0.9276 | 0.4028 |
| K00420 | QCR10, UK | K00420                                     | 1.113  | 3.365  | 0.3022 |
|        |           | g__Debaryomyces.s__Debaryomyces_hansenii   | 1.113  | 3.365  | 0.3022 |
| K03946 | NDUFA2    | K03946                                     | 2.6798 | 1.3036 | 0.4298 |
|        |           | g__Debaryomyces.s__Debaryomyces_hansenii   | 2.6798 | 1.3036 | 0.4298 |
| K02144 | ATPeV1HK  | K02144                                     | 2.6604 | 0.885  | 0.6927 |
|        |           | g__Debaryomyces.s__Debaryomyces_hansenii   | 2.6604 | 0.885  | 0.6927 |
| K03937 | NDUFS4    | K03937                                     | 1.6504 | 2.1192 | 0.4185 |
|        |           | g__Debaryomyces.s__Debaryomyces_hansenii   | 1.6504 | 2.1192 | 0.4185 |
| K02260 | COX17     | K02260                                     | 1.9236 | 1.9558 | 0      |
|        |           | g__Debaryomyces.s__Debaryomyces_hansenii   | 1.9236 | 1.9558 | 0      |
| K00416 | QCR6, UC  | K00416                                     | 1.4996 | 1.5906 | 0.6358 |
|        |           | g__Debaryomyces.s__Debaryomyces_hansenii   | 1.4996 | 1.5906 | 0.6358 |
| K03952 | NDUFA8    | K03952                                     | 1.874  | 1.2778 | 0.5342 |
|        |           | g__Debaryomyces.s__Debaryomyces_hansenii   | 1.874  | 1.2778 | 0.5342 |
| K02139 | ATPeFF,   | K02139                                     | 1.1326 | 1.014  | 1.2518 |
|        |           | g__Debaryomyces.s__Debaryomyces_hansenii   | 1.1326 | 1.014  | 1.2518 |
| K00334 | nuoE      | K00334                                     | 1.2094 | 1.5754 | 0.519  |
|        |           | g__Escherichia.s__Escherichia_coli         | 1.0014 | 1.271  | 0.2497 |
|        |           | g__Proteus.s__Proteus_mirabilis            | 0.0752 | 0      | 0      |
|        |           | K00334unclassified                         | 0.1328 | 0.3044 | 0.2695 |
| K00246 | frdC      | K00246                                     | 1.2454 | 1.6354 | 0      |

|        |            |                                           |        |        |        |
|--------|------------|-------------------------------------------|--------|--------|--------|
|        |            | g_Escherichia.s_Escherichia_coli          | 0.3492 | 1.4942 | 0      |
|        |            | g_Klebsiella.s_Klebsiella_pneumoniae      | 0      | 0.1414 | 0      |
|        |            | g_Proteus.s_Proteus_mirabilis             | 0.1208 | 0      | 0      |
|        |            | K00246unclassified                        | 0.7754 | 0      | 0      |
| K02119 | ATPVC, n   | K02119                                    | 0      | 0.964  | 1.5683 |
|        |            | g_Aerococcus.s_Aerococcus_viridans        | 0      | 0.964  | 1.5683 |
| K02829 | qoxD       | K02829                                    | 1.7662 | 0      | 0.8255 |
|        |            | g_Staphylococcus.s_Staphylococcus_xylosus | 1.7662 | 0      | 0.8255 |
| K00412 | CYTB, pe   | K00412                                    | 2.1342 | 0      | 0.4847 |
|        |            | K00412unclassified                        | 2.1342 | 0      | 0.4847 |
| K00242 | sdhD, frdI | K00242                                    | 1.3084 | 1.1898 | 0.1337 |
|        |            | g_Escherichia.s_Escherichia_coli          | 1.3084 | 1.0038 | 0.1337 |
|        |            | g_Klebsiella.s_Klebsiella_pneumoniae      | 0      | 0.186  | 0      |
| K00405 | ccoO       | K00405                                    | 2.3912 | 0      | 0      |
|        |            | K00405unclassified                        | 2.3912 | 0      | 0      |
| K00404 | ccoN       | K00404                                    | 2.271  | 0      | 0      |
|        |            | K00404unclassified                        | 2.271  | 0      | 0      |
| K00247 | frdD       | K00247                                    | 0.7162 | 1.378  | 0.142  |
|        |            | g_Escherichia.s_Escherichia_coli          | 0.7162 | 1.378  | 0.142  |
| K02826 | qoxA       | K02826                                    | 1.1674 | 0.568  | 0.4165 |
|        |            | g_Staphylococcus.s_Staphylococcus_xylosus | 1.1674 | 0.568  | 0.4165 |
| K00417 | QCR7, U    | K00417                                    | 0.5144 | 1.135  | 0.4285 |
|        |            | g_Deбaryomyces.s_Deбaryomyces_hansenii    | 0.5144 | 1.135  | 0.4285 |
| K02827 | qoxB       | K02827                                    | 0.911  | 0.525  | 0.5208 |
|        |            | g_Staphylococcus.s_Staphylococcus_xylosus | 0.6908 | 0.525  | 0.5208 |
|        |            | K02827unclassified                        | 0.2202 | 0      | 0      |
| K02133 | ATPeF1B,   | K02133                                    | 0.2684 | 0.9008 | 0.659  |
|        |            | g_Meyerozyma.s_Meyerozyma_guilliermondii  | 0.0226 | 0      | 0      |
|        |            | K02133unclassified                        | 0.2458 | 0.9008 | 0.659  |
| K02277 | coxD, ctaI | K02277                                    | 0      | 0      | 1.3977 |
|        |            | K02277unclassified                        | 0      | 0      | 1.3977 |
| K02299 | cyoC       | K02299                                    | 0.745  | 0.5732 | 0.2375 |
|        |            | g_Escherichia.s_Escherichia_coli          | 0.745  | 0.5732 | 0.2375 |
| K01535 | PMA1, PM   | K01535                                    | 0.0304 | 0.3668 | 1.0104 |
|        |            | g_Meyerozyma.s_Meyerozyma_guilliermondii  | 0.0304 | 0      | 0      |
|        |            | K01535unclassified                        | 0      | 0.3668 | 1.0104 |
| K02297 | cyoA       | K02297                                    | 0.6836 | 0.4656 | 0.1083 |
|        |            | g_Escherichia.s_Escherichia_coli          | 0.6836 | 0.3964 | 0.1083 |
|        |            | g_Proteus.s_Proteus_mirabilis             | 0      | 0.0692 | 0      |
| K00333 | nuoD       | K00333                                    | 1.2676 | 0      | 0      |
|        |            | K00333unclassified                        | 1.2676 | 0      | 0      |
| K02828 | qoxC       | K02828                                    | 0.6148 | 0.1978 | 0.2545 |
|        |            | g_Staphylococcus.s_Staphylococcus_xylosus | 0.6148 | 0.1978 | 0.2545 |
| K02300 | cyoD       | K02300                                    | 0.3296 | 0.5788 | 0      |
|        |            | g_Escherichia.s_Escherichia_coli          | 0.3296 | 0      | 0      |
|        |            | g_Klebsiella.s_Klebsiella_pneumoniae      | 0      | 0.5788 | 0      |
| K02142 | ATPeFJ, A  | K02142                                    | 0.8892 | 0      | 0      |
|        |            | g_Deбaryomyces.s_Deбaryomyces_hansenii    | 0.8892 | 0      | 0      |
| K00234 | SDHA, SI   | K00234                                    | 0      | 0      | 0.3695 |
|        |            | K00234unclassified                        | 0      | 0      | 0.3695 |
| K00407 | ccoQ       | K00407                                    | 0.3832 | 0      | 0      |
|        |            | K00407unclassified                        | 0.3832 | 0      | 0      |
| K02298 | cyoB       | K02298                                    | 0      | 0.1898 | 0      |
|        |            | g_Klebsiella.s_Klebsiella_pneumoniae      | 0      | 0.1898 | 0      |
| K00688 | PYG, glgF  | K00688                                    | 21.101 | 22.538 | 25.563 |
|        |            | g_Aerococcus.s_Aerococcus_viridans        | 0      | 0.7646 | 1.3062 |
|        |            | g_Klebsiella.s_Klebsiella_pneumoniae      | 0      | 0.4118 | 0      |
|        |            | g_Lactococcus.s_Lactococcus_raffinolactis | 0.0182 | 0      | 0.0127 |

|                                               |                   |                                                  |        |        |        |
|-----------------------------------------------|-------------------|--------------------------------------------------|--------|--------|--------|
|                                               |                   | K00688unclassified                               | 21.083 | 21.361 | 24.244 |
| K00844                                        | HK                | K00844                                           | 14.981 | 16.244 | 12.087 |
|                                               |                   | g__Bacteroides.s__Bacteroides_thetaiotaomicron   | 6.6494 | 9.8578 | 9.5063 |
|                                               |                   | g__Debaryomyces.s__Debaryomyces_hansenii         | 8.331  | 6.3866 | 2.58   |
| K07192                                        | FLOT              | K07192                                           | 9.2098 | 14.955 | 17.843 |
|                                               |                   | g__Bacteroides.s__Bacteroides_thetaiotaomicron   | 6.9166 | 10.244 | 7.0313 |
|                                               |                   | g__Corynebacterium.s__Corynebacterium_glutamicum | 0.1414 | 1.6444 | 4.2043 |
|                                               |                   | g__Enterococcus.s__Enterococcus_faecalis         | 0.0226 | 0      | 0.0403 |
|                                               |                   | g__Lactococcus.s__Lactococcus_lactis             | 0.5742 | 0.6368 | 0.3183 |
|                                               |                   | g__Lactococcus.s__Lactococcus_raffinolactis      | 0.0508 | 0.1014 | 0.081  |
|                                               |                   | K07192unclassified                               | 1.504  | 2.329  | 6.1667 |
| K06269                                        | PPP1C             | K06269                                           | 8.7018 | 7.2668 | 4.8008 |
|                                               |                   | g__Debaryomyces.s__Debaryomyces_hansenii         | 8.4762 | 6.0162 | 3.1775 |
|                                               |                   | K06269unclassified                               | 0.2256 | 1.2506 | 1.6233 |
| K01596                                        | E4.1.1.32, K01596 | K01596                                           | 0.5712 | 2.2956 | 12.637 |
|                                               |                   | g__Corynebacterium.s__Corynebacterium_glutamicum | 0.19   | 1.2624 | 2.4665 |
|                                               |                   | K01596unclassified                               | 0.3812 | 1.0332 | 10.17  |
| K04345                                        | PKA               | K04345                                           | 6.4232 | 5.4574 | 3.4862 |
|                                               |                   | g__Debaryomyces.s__Debaryomyces_hansenii         | 6.05   | 4.4738 | 2.143  |
|                                               |                   | g__Meyerozyma.s__Meyerozyma_guilliermondii       | 0.0938 | 0      | 0      |
|                                               |                   | K04345unclassified                               | 0.2792 | 0.9836 | 1.3432 |
| K04371                                        | ERK, MA           | K04371                                           | 5.7072 | 3.925  | 2.1435 |
|                                               |                   | g__Debaryomyces.s__Debaryomyces_hansenii         | 5.7072 | 3.925  | 2.1435 |
| map04922_<br>Glucagon<br>signaling<br>pathway | K06276            | PDPK1 K06276                                     | 5.1586 | 3.8524 | 1.6093 |
|                                               |                   | g__Debaryomyces.s__Debaryomyces_hansenii         | 5.145  | 3.8524 | 1.6093 |
|                                               |                   | g__Meyerozyma.s__Meyerozyma_guilliermondii       | 0.0134 | 0      | 0      |
|                                               | K03841            | FBP, fbp K03841                                  | 3.2946 | 3.3838 | 1.962  |
|                                               |                   | g__Debaryomyces.s__Debaryomyces_hansenii         | 2.6468 | 1.9308 | 1.3525 |
|                                               |                   | g__Escherichia.s__Escherichia_coli               | 0.613  | 0.5756 | 0      |
|                                               |                   | g__Klebsiella.s__Klebsiella_pneumoniae           | 0      | 0.8018 | 0      |
|                                               |                   | g__Proteus.s__Proteus_mirabilis                  | 0.0348 | 0.0752 | 0      |
|                                               |                   | K03841unclassified                               | 0      | 0      | 0.6095 |
| K02183                                        | CALM              | K02183                                           | 2.2116 | 3.8078 | 1.8227 |
|                                               |                   | g__Debaryomyces.s__Debaryomyces_hansenii         | 2.2116 | 2.551  | 0.6237 |
|                                               |                   | K02183unclassified                               | 0      | 1.2572 | 1.199  |
| K03259                                        | EIF4E             | K03259                                           | 3.3878 | 3.1194 | 1.13   |
|                                               |                   | g__Debaryomyces.s__Debaryomyces_hansenii         | 3.3878 | 3.1194 | 1.13   |
| K04739                                        | PRKAR             | K04739                                           | 4.0038 | 2.269  | 0.8053 |
|                                               |                   | g__Debaryomyces.s__Debaryomyces_hansenii         | 4.0038 | 2.269  | 0.8053 |
| K02991                                        | RP-S6e, RK        | K02991                                           | 3.0984 | 2.3084 | 1.5042 |
|                                               |                   | g__Debaryomyces.s__Debaryomyces_hansenii         | 3.0984 | 2.3084 | 1.5042 |
| K07200                                        | PRKAG             | K07200                                           | 3.256  | 2.4872 | 1.026  |
|                                               |                   | g__Debaryomyces.s__Debaryomyces_hansenii         | 3.256  | 2.4872 | 1.026  |
| K03083                                        | GSK3B             | K03083                                           | 2.8502 | 2.1628 | 1.1662 |
|                                               |                   | g__Debaryomyces.s__Debaryomyces_hansenii         | 2.8502 | 2.1628 | 1.1662 |
| K07204                                        | RAPTOR            | K07204                                           | 2.873  | 2.0864 | 0.9738 |
|                                               |                   | g__Debaryomyces.s__Debaryomyces_hansenii         | 2.873  | 2.0864 | 0.9738 |
| K07208                                        | RHEB              | K07208                                           | 2.8516 | 1.9996 | 0.7788 |
|                                               |                   | g__Debaryomyces.s__Debaryomyces_hansenii         | 2.8516 | 1.9996 | 0.7788 |
| K07827                                        | KRAS, KIK         | K07827                                           | 2.4928 | 1.6862 | 1.1705 |
|                                               |                   | g__Debaryomyces.s__Debaryomyces_hansenii         | 2.4928 | 1.6862 | 1.1705 |
| K03099                                        | SOS               | K03099                                           | 2.6738 | 1.733  | 0.8135 |
|                                               |                   | g__Debaryomyces.s__Debaryomyces_hansenii         | 2.6738 | 1.733  | 0.8135 |
| K00693                                        | GYS               | K00693                                           | 0      | 0      | 0.5423 |
|                                               |                   | K00693unclassified                               | 0      | 0      | 0.5423 |
| K00688                                        | PYG, glgF         | K00688                                           | 21.101 | 22.538 | 25.563 |
|                                               |                   | g__Aerococcus.s__Aerococcus_viridans             | 0      | 0.7646 | 1.3062 |
|                                               |                   | g__Klebsiella.s__Klebsiella_pneumoniae           | 0      | 0.4118 | 0      |

|            |                   |                                                       |        |        |        |
|------------|-------------------|-------------------------------------------------------|--------|--------|--------|
|            |                   | <i>g_Lactococcus.s_Lactococcus_raffinolactis</i>      | 0.0182 | 0      | 0.0127 |
|            |                   | K00688unclassified                                    | 21.083 | 21.361 | 24.244 |
| K00844     | HK                | K00844                                                | 14.981 | 16.244 | 12.087 |
|            |                   | <i>g_Bacteroides.s_Bacteroides_thetaiotaomicron</i>   | 6.6494 | 9.8578 | 9.5063 |
|            |                   | <i>g_Deбaryomyces.s_Deбaryomyces_hansenii</i>         | 8.331  | 6.3866 | 2.58   |
| K07192     | FLOT              | K07192                                                | 9.2098 | 14.955 | 17.843 |
|            |                   | <i>g_Bacteroides.s_Bacteroides_thetaiotaomicron</i>   | 6.9166 | 10.244 | 7.0313 |
|            |                   | <i>g_Corynebacterium.s_Corynebacterium_glutamicum</i> | 0.1414 | 1.6444 | 4.2043 |
|            |                   | <i>g_Enterococcus.s_Enterococcus_faecalis</i>         | 0.0226 | 0      | 0.0403 |
|            |                   | <i>g_Lactococcus.s_Lactococcus_lactis</i>             | 0.5742 | 0.6368 | 0.3183 |
|            |                   | <i>g_Lactococcus.s_Lactococcus_raffinolactis</i>      | 0.0508 | 0.1014 | 0.081  |
|            |                   | K07192unclassified                                    | 1.504  | 2.329  | 6.1667 |
| K06269     | PPP1C             | K06269                                                | 8.7018 | 7.2668 | 4.8008 |
|            |                   | <i>g_Deбaryomyces.s_Deбaryomyces_hansenii</i>         | 8.4762 | 6.0162 | 3.1775 |
|            |                   | K06269unclassified                                    | 0.2256 | 1.2506 | 1.6233 |
| K01596     | E4.1.1.32, K01596 |                                                       | 0.5712 | 2.2956 | 12.637 |
|            |                   | <i>g_Corynebacterium.s_Corynebacterium_glutamicum</i> | 0.19   | 1.2624 | 2.4665 |
|            |                   | K01596unclassified                                    | 0.3812 | 1.0332 | 10.17  |
| K04345     | PKA               | K04345                                                | 6.4232 | 5.4574 | 3.4862 |
|            |                   | <i>g_Deбaryomyces.s_Deбaryomyces_hansenii</i>         | 6.05   | 4.4738 | 2.143  |
|            |                   | <i>g_Meyerozyma.s_Meyerozyma_guilliermondii</i>       | 0.0938 | 0      | 0      |
|            |                   | K04345unclassified                                    | 0.2792 | 0.9836 | 1.3432 |
| K04371     | ERK, MA           | K04371                                                | 5.7072 | 3.925  | 2.1435 |
|            |                   | <i>g_Deбaryomyces.s_Deбaryomyces_hansenii</i>         | 5.7072 | 3.925  | 2.1435 |
| map04910_I | K06276            | PDPK1 K06276                                          | 5.1586 | 3.8524 | 1.6093 |
| nsulin     |                   | <i>g_Deбaryomyces.s_Deбaryomyces_hansenii</i>         | 5.145  | 3.8524 | 1.6093 |
| signaling  |                   | <i>g_Meyerozyma.s_Meyerozyma_guilliermondii</i>       | 0.0134 | 0      | 0      |
| pathway    | K03841            | FBP, fbp K03841                                       | 3.2946 | 3.3838 | 1.962  |
|            |                   | <i>g_Deбaryomyces.s_Deбaryomyces_hansenii</i>         | 2.6468 | 1.9308 | 1.3525 |
|            |                   | <i>g_Escherichia.s_Escherichia_coli</i>               | 0.613  | 0.5756 | 0      |
|            |                   | <i>g_Klebsiella.s_Klebsiella_pneumoniae</i>           | 0      | 0.8018 | 0      |
|            |                   | <i>g_Proteus.s_Proteus_mirabilis</i>                  | 0.0348 | 0.0752 | 0      |
|            |                   | K03841unclassified                                    | 0      | 0      | 0.6095 |
| K02183     | CALM              | K02183                                                | 2.2116 | 3.8078 | 1.8227 |
|            |                   | <i>g_Deбaryomyces.s_Deбaryomyces_hansenii</i>         | 2.2116 | 2.551  | 0.6237 |
|            |                   | K02183unclassified                                    | 0      | 1.2572 | 1.199  |
| K03259     | EIF4E             | K03259                                                | 3.3878 | 3.1194 | 1.13   |
|            |                   | <i>g_Deбaryomyces.s_Deбaryomyces_hansenii</i>         | 3.3878 | 3.1194 | 1.13   |
| K04739     | PRKAR             | K04739                                                | 4.0038 | 2.269  | 0.8053 |
|            |                   | <i>g_Deбaryomyces.s_Deбaryomyces_hansenii</i>         | 4.0038 | 2.269  | 0.8053 |
| K02991     | RP-S6e, RK        | K02991                                                | 3.0984 | 2.3084 | 1.5042 |
|            |                   | <i>g_Deбaryomyces.s_Deбaryomyces_hansenii</i>         | 3.0984 | 2.3084 | 1.5042 |
| K07200     | PRKAG             | K07200                                                | 3.256  | 2.4872 | 1.026  |
|            |                   | <i>g_Deбaryomyces.s_Deбaryomyces_hansenii</i>         | 3.256  | 2.4872 | 1.026  |
| K03083     | GSK3B             | K03083                                                | 2.8502 | 2.1628 | 1.1662 |
|            |                   | <i>g_Deбaryomyces.s_Deбaryomyces_hansenii</i>         | 2.8502 | 2.1628 | 1.1662 |
| K07204     | RAPTOR            | K07204                                                | 2.873  | 2.0864 | 0.9738 |
|            |                   | <i>g_Deбaryomyces.s_Deбaryomyces_hansenii</i>         | 2.873  | 2.0864 | 0.9738 |
| K07208     | RHEB              | K07208                                                | 2.8516 | 1.9996 | 0.7788 |
|            |                   | <i>g_Deбaryomyces.s_Deбaryomyces_hansenii</i>         | 2.8516 | 1.9996 | 0.7788 |
| K07827     | KRAS, KIK         | K07827                                                | 2.4928 | 1.6862 | 1.1705 |
|            |                   | <i>g_Deбaryomyces.s_Deбaryomyces_hansenii</i>         | 2.4928 | 1.6862 | 1.1705 |
| K03099     | SOS               | K03099                                                | 2.6738 | 1.733  | 0.8135 |
|            |                   | <i>g_Deбaryomyces.s_Deбaryomyces_hansenii</i>         | 2.6738 | 1.733  | 0.8135 |
| K00693     | GYS               | K00693                                                | 0      | 0      | 0.5423 |
|            |                   | K00693unclassified                                    | 0      | 0      | 0.5423 |
| K01897     | ACSL, fac         | K01897                                                | 41.184 | 55.502 | 94.957 |
|            |                   | <i>g_Alistipes.s_Alistipes_shahii</i>                 | 0      | 0.8852 | 0.6623 |

|        |                                                 |        |        |        |
|--------|-------------------------------------------------|--------|--------|--------|
|        | g_Bacteroides.s_Bacteroides_thetaiotaomicron    | 19.587 | 26.222 | 28.11  |
|        | g_Corynebacterium.s_Corynebacterium_glutamicum  | 0.0228 | 1.6776 | 2.0238 |
|        | g_Debaryomyces.s_Debaryomyces_hansenii          | 11.282 | 7.5546 | 3.7972 |
|        | g_Escherichia.s_Escherichia_coli                | 0.5094 | 0.2604 | 0.0212 |
|        | g_Klebsiella.s_Klebsiella_pneumoniae            | 0      | 0.4154 | 0      |
|        | g_Lactococcus.s_Lactococcus_lactis              | 0.1604 | 0.1944 | 0.249  |
|        | g_Meyerozyma.s_Meyerozyma_guilliermondii        | 0.0178 | 0      | 0      |
|        | g_Proteus.s_Proteus_mirabilis                   | 0.0564 | 0.018  | 0      |
|        | K01897unclassified                              | 9.5478 | 18.274 | 60.094 |
| K00059 | fabG, OAIK00059                                 | 53.76  | 42.074 | 65.823 |
|        | g_Aerococcus.s_Aerococcus_viridans              | 0      | 0.7746 | 0.7287 |
|        | g_Bacteroides.s_Bacteroides_thetaiotaomicron    | 9.6322 | 16.386 | 20.855 |
|        | g_Bacteroides.s_Bacteroides_uniformis           | 0      | 6.7334 | 0      |
|        | g_Debaryomyces.s_Debaryomyces_hansenii          | 2.3206 | 2.491  | 0.811  |
|        | g_Enterococcus.s_Enterococcus_faecalis          | 0.0484 | 0.1028 | 0.0432 |
|        | g_Escherichia.s_Escherichia_coli                | 0.1926 | 0.2164 | 0.0453 |
|        | g_Klebsiella.s_Klebsiella_pneumoniae            | 0      | 0.1736 | 0      |
|        | g_Lactobacillus.s_Lactobacillus_delbrueckii     | 0.1128 | 0.5182 | 0.0975 |
|        | g_Lactobacillus.s_Lactobacillus_helveticus      | 0.1042 | 0      | 0.1898 |
|        | g_Lactobacillus.s_Lactobacillus_johnsonii       | 24.646 | 3.9284 | 14.675 |
|        | g_Lactobacillus.s_Lactobacillus_reuteri         | 4.2742 | 0.7262 | 2.689  |
|        | g_Lactococcus.s_Lactococcus_lactis              | 1.5286 | 1.7292 | 1.834  |
|        | g_Lactococcus.s_Lactococcus_raffinolactis       | 0      | 0      | 0.1427 |
|        | g_Leuconostoc.s_Leuconostoc_mesenteroides       | 0      | 0      | 0.0573 |
|        | g_Meyerozyma.s_Meyerozyma_guilliermondii        | 0.054  | 0      | 0      |
|        | g_Proteus.s_Proteus_mirabilis                   | 0.051  | 0.1524 | 0      |
|        | K00059unclassified                              | 10.795 | 8.1412 | 23.655 |
| K01961 | accC                                            | 30.76  | 38.892 | 40.803 |
|        | g_Aerococcus.s_Aerococcus_viridans              | 0      | 1.1372 | 0.69   |
|        | g_Bacteroides.s_Bacteroides_thetaiotaomicron    | 7.45   | 9.3336 | 9.442  |
|        | g_Enterorhabdus.s_Enterorhabdus_caecimuris      | 2.4898 | 7.5372 | 5.5873 |
|        | g_Escherichia.s_Escherichia_coli                | 0.924  | 0.6108 | 0.0663 |
|        | g_Klebsiella.s_Klebsiella_pneumoniae            | 0      | 0.8394 | 0      |
|        | g_Lactobacillus.s_Lactobacillus_delbrueckii     | 0.3604 | 0.4654 | 0.1655 |
|        | g_Lactobacillus.s_Lactobacillus_helveticus      | 0.0854 | 0.1266 | 0.0712 |
|        | g_Lactobacillus.s_Lactobacillus_reuteri         | 5.7874 | 0.798  | 3.5358 |
|        | g_Lactococcus.s_Lactococcus_lactis              | 0.7044 | 1.0254 | 0.4613 |
|        | g_Leuconostoc.s_Leuconostoc_lactis              | 0      | 0      | 0.0433 |
|        | g_Leuconostoc.s_Leuconostoc_mesenteroides       | 0.025  | 0      | 0.0298 |
|        | g_Proteus.s_Proteus_mirabilis                   | 0      | 0.0744 | 0      |
|        | g_Staphylococcus.s_Staphylococcus_xylosus       | 0.7374 | 0.5824 | 0.2248 |
|        | g_Streptococcus.s_Streptococcus_thermophilus    | 0.4502 | 0.4794 | 0.5307 |
|        | K01961unclassified                              | 11.745 | 15.882 | 19.955 |
| K00648 | fabH                                            | 30.227 | 32.625 | 44.415 |
|        | g_Alistipes.s_Alistipes_finegoldii              | 0      | 0.0794 | 0.034  |
|        | g_Bacteroides.s_Bacteroides_thetaiotaomicron    | 16.157 | 22.97  | 26.917 |
|        | g_Enterococcus.s_Enterococcus_faecalis          | 0      | 0.0428 | 0.065  |
|        | g_Escherichia.s_Escherichia_coli                | 0.6972 | 0.4466 | 0.066  |
|        | g_Klebsiella.s_Klebsiella_pneumoniae            | 0      | 0.4466 | 0      |
|        | g_Lactobacillus.s_Lactobacillus_delbrueckii     | 0.2486 | 0.2842 | 0.0637 |
|        | g_Lactobacillus.s_Lactobacillus_helveticus      | 0.163  | 0.1734 | 0.0955 |
|        | g_Lactobacillus.s_Lactobacillus_reuteri         | 5.4512 | 0.6728 | 3.1962 |
|        | g_Lactococcus.s_Lactococcus_lactis              | 0.5374 | 0.6046 | 0.8493 |
|        | g_Lactococcus.s_Lactococcus_raffinolactis       | 0      | 0.042  | 0.2167 |
|        | g_Parabacteroides.s_Parabacteroides_goldsteinii | 3.2264 | 2.221  | 6.3732 |
|        | g_Staphylococcus.s_Staphylococcus_xylosus       | 0.9678 | 0.4662 | 0.6875 |
|        | g_Streptococcus.s_Streptococcus_thermophilus    | 0.2668 | 0.6366 | 0.6293 |
|        | K00648unclassified                              | 2.5112 | 3.5388 | 5.2212 |

|              |                  |                                                |        |        |        |
|--------------|------------------|------------------------------------------------|--------|--------|--------|
| K02371       | fabK             | K02371                                         | 18.044 | 25.422 | 33.95  |
|              |                  | g__Aerococcus.s__Aerococcus_viridans           | 0      | 0.8086 | 0.9987 |
|              |                  | g__Bacteroides.s__Bacteroides_thetaiotaomicron | 6.21   | 8.1408 | 8.673  |
|              |                  | g__Enterococcus.s__Enterococcus_faecalis       | 0.0738 | 0.0344 | 0.0328 |
|              |                  | g__Enterorhabdus.s__Enterorhabdus_caecimuris   | 3.2188 | 9.6904 | 8.4747 |
|              |                  | g__Klebsiella.s__Klebsiella_pneumoniae         | 0      | 0.1252 | 0      |
|              |                  | g__Lactococcus.s__Lactococcus_lactis           | 0.0428 | 0.0428 | 0.041  |
|              |                  | g__Lactococcus.s__Lactococcus_raffinolactis    | 0      | 0.0432 | 0      |
|              |                  | g__Leuconostoc.s__Leuconostoc_lactis           | 0      | 0.0364 | 0      |
|              |                  | g__Leuconostoc.s__Leuconostoc_mesenteroides    | 0.301  | 0.1654 | 0.107  |
|              |                  | K02371unclassified                             | 8.1978 | 6.3348 | 15.623 |
| K09458       | fabF, OXSK09458  |                                                | 24.272 | 25.437 | 20.894 |
|              |                  | g__Aerococcus.s__Aerococcus_viridans           | 0      | 0.9698 | 0.9377 |
|              |                  | g__Alistipes.s__Alistipes_shahii               | 0      | 0.4338 | 0.0545 |
|              |                  | g__Debaryomyces.s__Debaryomyces_hansenii       | 2.5094 | 2.3668 | 0.9313 |
|              |                  | g__Enterorhabdus.s__Enterorhabdus_caecimuris   | 2.9646 | 9.4876 | 7.7925 |
|              |                  | g__Lactobacillus.s__Lactobacillus_delbrueckii  | 0.2338 | 0.4464 | 0.0538 |
|              |                  | g__Lactobacillus.s__Lactobacillus_reuteri      | 4.6942 | 0.853  | 2.9563 |
|              |                  | g__Lactococcus.s__Lactococcus_lactis           | 0.9188 | 0.9076 | 0.4678 |
|              |                  | g__Leuconostoc.s__Leuconostoc_lactis           | 0.0268 | 0      | 0.0273 |
|              |                  | g__Proteus.s__Proteus_mirabilis                | 0      | 0.0272 | 0      |
|              |                  | g__Streptococcus.s__Streptococcus_thermophilus | 0.351  | 0.3056 | 0.6422 |
|              |                  | K09458unclassified                             | 12.574 | 9.6384 | 7.0303 |
| K02372       | fabZ             | K02372                                         | 23.029 | 16.027 | 27.062 |
|              |                  | g__Enterococcus.s__Enterococcus_faecalis       | 0      | 0.1248 | 0      |
|              |                  | g__Escherichia.s__Escherichia_coli             | 1.6888 | 0.9184 | 0      |
|              |                  | g__Klebsiella.s__Klebsiella_pneumoniae         | 0      | 4.562  | 0      |
|              |                  | g__Lactobacillus.s__Lactobacillus_delbrueckii  | 0.3116 | 0.4326 | 0.1015 |
|              |                  | g__Lactobacillus.s__Lactobacillus_helveticus   | 0.9196 | 0.1242 | 0      |
|              |                  | g__Lactobacillus.s__Lactobacillus_reuteri      | 12.456 | 2.146  | 5.5973 |
|              |                  | g__Lactococcus.s__Lactococcus_lactis           | 0.7406 | 1.6506 | 2.2478 |
| map00061_    |                  | g__Leuconostoc.s__Leuconostoc_lactis           | 0      | 0.1    | 0      |
| Fatty acid   |                  | g__Leuconostoc.s__Leuconostoc_mesenteroides    | 0      | 0      | 0.0702 |
| biosynthesis |                  | g__Staphylococcus.s__Staphylococcus_xylosum    | 0.6218 | 0.423  | 0      |
|              |                  | K02372unclassified                             | 6.2896 | 5.5452 | 19.046 |
| K00645       | fabD, MC.K00645  |                                                | 14.374 | 24.788 | 21.126 |
|              |                  | g__Aerococcus.s__Aerococcus_viridans           | 0.0454 | 0.7266 | 0.4147 |
|              |                  | g__Alistipes.s__Alistipes_shahii               | 0      | 0.6152 | 0.3177 |
|              |                  | g__Bacteroides.s__Bacteroides_thetaiotaomicron | 5.7642 | 9.1626 | 10.577 |
|              |                  | g__Bacteroides.s__Bacteroides_uniformis        | 0      | 5.4076 | 0      |
|              |                  | g__Debaryomyces.s__Debaryomyces_hansenii       | 2.5096 | 1.4358 | 1.0803 |
|              |                  | g__Enterococcus.s__Enterococcus_faecalis       | 0      | 0.0922 | 0.034  |
|              |                  | g__Escherichia.s__Escherichia_coli             | 0.4988 | 0.2784 | 0      |
|              |                  | g__Lactobacillus.s__Lactobacillus_delbrueckii  | 0.2688 | 0.5456 | 0.0668 |
|              |                  | g__Lactococcus.s__Lactococcus_lactis           | 0.2446 | 0.3358 | 0.5448 |
|              |                  | g__Proteus.s__Proteus_mirabilis                | 0.038  | 0.0446 | 0      |
|              |                  | g__Streptococcus.s__Streptococcus_thermophilus | 0.8452 | 0.719  | 0.6532 |
|              |                  | K00645unclassified                             | 4.1596 | 5.424  | 7.438  |
| K01071       | MCH              | K01071                                         | 31.621 | 6.3986 | 21.038 |
|              |                  | g__Alistipes.s__Alistipes_shahii               | 0      | 0.6502 | 0.3267 |
|              |                  | g__Enterococcus.s__Enterococcus_faecalis       | 0.051  | 0.1262 | 0      |
|              |                  | g__Lactobacillus.s__Lactobacillus_delbrueckii  | 0.2508 | 0.2906 | 0.0507 |
|              |                  | g__Lactobacillus.s__Lactobacillus_johnsonii    | 22.36  | 3.7032 | 14.724 |
|              |                  | g__Lactobacillus.s__Lactobacillus_reuteri      | 8.3324 | 1.2048 | 5.236  |
|              |                  | g__Lactococcus.s__Lactococcus_lactis           | 0.5784 | 0.4234 | 0.6112 |
|              |                  | g__Lactococcus.s__Lactococcus_raffinolactis    | 0.0488 | 0      | 0.0893 |
| K16363       | lpxC-fabZ K16363 |                                                | 11.064 | 18.495 | 17.173 |
|              |                  | g__Bacteroides.s__Bacteroides_thetaiotaomicron | 9.408  | 10.526 | 13.822 |

|        |            |                                                |        |        |        |
|--------|------------|------------------------------------------------|--------|--------|--------|
|        |            | g_Bacteroides.s_Bacteroides_uniformis          | 0      | 5.372  | 0      |
|        |            | K16363unclassified                             | 1.656  | 2.5972 | 3.3517 |
| K01963 | accD       | K01963                                         | 18.376 | 14.13  | 11.767 |
|        |            | g_Aerococcus.s_Aerococcus_viridans             | 0      | 0.856  | 0.5132 |
|        |            | g_Corynebacterium.s_Corynebacterium_glutamicum | 0.0544 | 1.4522 | 2.1853 |
|        |            | g_Enterococcus.s_Enterococcus_faecalis         | 0.0832 | 0.0486 | 0.1112 |
|        |            | g_Escherichia.s_Escherichia_coli               | 0.6276 | 0.7632 | 0.0347 |
|        |            | g_Klebsiella.s_Klebsiella_pneumoniae           | 0      | 0.1344 | 0      |
|        |            | g_Lactobacillus.s_Lactobacillus_delbrueckii    | 0.2654 | 0.3056 | 0.038  |
|        |            | g_Lactobacillus.s_Lactobacillus_helveticus     | 0.0512 | 0.5064 | 0.0438 |
|        |            | g_Lactobacillus.s_Lactobacillus_reuteri        | 4.0608 | 1.0862 | 3.0622 |
|        |            | g_Lactococcus.s_Lactococcus_lactis             | 0.6636 | 0.5402 | 0.8495 |
|        |            | g_Lactococcus.s_Lactococcus_raffinolactis      | 0      | 0.043  | 0      |
|        |            | g_Leuconostoc.s_Leuconostoc_mesenteroides      | 0.0412 | 0.1848 | 0.204  |
|        |            | g_Staphylococcus.s_Staphylococcus_xylosum      | 0.956  | 0.2976 | 0.3282 |
|        |            | g_Streptococcus.s_Streptococcus_thermophilus   | 0.5716 | 0.389  | 0.4928 |
|        |            | K01963unclassified                             | 11.001 | 7.5222 | 3.9045 |
| K11533 | fas        | K11533                                         | 0.331  | 2.1632 | 18.646 |
|        |            | K11533unclassified                             | 0.331  | 2.1632 | 18.646 |
| K00208 | fabI       | K00208                                         | 7.6328 | 3.2492 | 6.3007 |
|        |            | g_Escherichia.s_Escherichia_coli               | 0.4748 | 0.276  | 0.145  |
|        |            | g_Klebsiella.s_Klebsiella_pneumoniae           | 0      | 0.142  | 0      |
|        |            | g_Lactobacillus.s_Lactobacillus_delbrueckii    | 0.0622 | 0.256  | 0.0952 |
|        |            | g_Lactobacillus.s_Lactobacillus_helveticus     | 0.118  | 0.1144 | 0.0492 |
|        |            | g_Lactobacillus.s_Lactobacillus_reuteri        | 4.9946 | 0.6506 | 3.9432 |
|        |            | g_Lactococcus.s_Lactococcus_lactis             | 0.573  | 1.092  | 0.6107 |
|        |            | g_Staphylococcus.s_Staphylococcus_xylosum      | 0.2676 | 0.3098 | 0.0998 |
|        |            | K00208unclassified                             | 1.143  | 0.4086 | 1.3582 |
| K11263 | bccA, pcc. | K11263                                         | 0      | 1.6778 | 12.671 |
|        |            | K11263unclassified                             | 0      | 1.6778 | 12.671 |
| K02160 | accB, bccI | K02160                                         | 7.0372 | 1.871  | 4.847  |
|        |            | g_Escherichia.s_Escherichia_coli               | 0.7362 | 0.4022 | 0.0825 |
|        |            | g_Lactobacillus.s_Lactobacillus_delbrueckii    | 0.3104 | 0      | 0      |
|        |            | g_Lactobacillus.s_Lactobacillus_reuteri        | 4.3404 | 0.4174 | 3.1802 |
|        |            | g_Lactococcus.s_Lactococcus_lactis             | 0.7604 | 0.7734 | 0.8972 |
|        |            | g_Proteus.s_Proteus_mirabilis                  | 0.1852 | 0      | 0      |
|        |            | g_Streptococcus.s_Streptococcus_thermophilus   | 0.7046 | 0.278  | 0.687  |
| K07512 | MECR, N    | K07512                                         | 6.536  | 3.8378 | 1.9335 |
|        |            | g_Debaryomyces.s_Debaryomyces_hansenii         | 6.536  | 3.8378 | 1.9335 |
| K01962 | accA       | K01962                                         | 4.0258 | 4.6616 | 2.4557 |
|        |            | g_Aerococcus.s_Aerococcus_viridans             | 0      | 0.971  | 0.5823 |
|        |            | g_Enterococcus.s_Enterococcus_faecalis         | 0      | 0.1524 | 0.0415 |
|        |            | g_Escherichia.s_Escherichia_coli               | 0.6068 | 0.6828 | 0      |
|        |            | g_Klebsiella.s_Klebsiella_pneumoniae           | 0      | 0.5892 | 0      |
|        |            | g_Lactobacillus.s_Lactobacillus_helveticus     | 0.107  | 0.206  | 0      |
|        |            | g_Lactococcus.s_Lactococcus_lactis             | 0.4616 | 1.0996 | 0.3595 |
|        |            | g_Leuconostoc.s_Leuconostoc_lactis             | 0      | 0.062  | 0.2335 |
|        |            | g_Proteus.s_Proteus_mirabilis                  | 0.1076 | 0.0862 | 0      |
|        |            | g_Staphylococcus.s_Staphylococcus_xylosum      | 0.839  | 0.2724 | 0.4453 |
|        |            | g_Streptococcus.s_Streptococcus_thermophilus   | 0.5074 | 0.5402 | 0.5253 |
|        |            | K01962unclassified                             | 1.3968 | 0      | 0.2682 |
| K22541 | HTD2       | K22541                                         | 2.8658 | 2.0174 | 0.7382 |
|        |            | g_Debaryomyces.s_Debaryomyces_hansenii         | 2.8658 | 2.0174 | 0.7382 |
| K00209 | fabV, ter  | K00209                                         | 0.0338 | 0.6918 | 1.1118 |
|        |            | g_Aerococcus.s_Aerococcus_viridans             | 0.0338 | 0.388  | 0.465  |
|        |            | K00209unclassified                             | 0      | 0.304  | 0.6468 |
| K18474 | fabM       | K18474                                         | 0.5624 | 0.3566 | 0.676  |
|        |            | g_Streptococcus.s_Streptococcus_thermophilus   | 0.5624 | 0.3566 | 0.676  |

|                                                |        |                                                  |        |        |        |
|------------------------------------------------|--------|--------------------------------------------------|--------|--------|--------|
| K01716                                         | fabA   | K01716                                           | 0.8044 | 0.6166 | 0      |
|                                                |        | g_Escherichia.s_Escherichia_coli                 | 0.8044 | 0.5416 | 0      |
|                                                |        | g_Proteus.s_Proteus_mirabilis                    | 0      | 0.075  | 0      |
| K00647                                         | fabB   | K00647                                           | 0.497  | 0.8246 | 0.0497 |
|                                                |        | g_Escherichia.s_Escherichia_coli                 | 0.4408 | 0.4544 | 0.0497 |
|                                                |        | g_Klebsiella.s_Klebsiella_pneumoniae             | 0      | 0.3422 | 0      |
| K00668                                         | FAS1   | K00668                                           | 0.005  | 0      | 0      |
|                                                |        | g_Meyerozyma.s_Meyerozyma_guilliermondii         | 0.005  | 0      | 0      |
| K00133                                         | asd    | K00133                                           | 59.22  | 71.241 | 67.241 |
|                                                |        | g_Aerococcus.s_Aerococcus_viridans               | 0.0794 | 1.2022 | 1.1883 |
|                                                |        | g_Blautia.s_Ruminococcus_torques                 | 0      | 0      | 0.026  |
|                                                |        | g_Clostridium.s_Clostridium_sp_ASF502            | 4.6042 | 9.64   | 1.215  |
|                                                |        | g_Corynebacterium.s_Corynebacterium_glutamicum   | 0.0868 | 1.2556 | 3.1185 |
|                                                |        | g_Debaryomyces.s_Debaryomyces_hansenii           | 2.955  | 2.1904 | 0.9883 |
|                                                |        | g_Enterorhabdus.s_Enterorhabdus_caecimuris       | 0.3462 | 1.1906 | 1.5002 |
|                                                |        | g_Escherichia.s_Escherichia_coli                 | 0.925  | 1.0426 | 0.0323 |
|                                                |        | g_Klebsiella.s_Klebsiella_pneumoniae             | 0      | 0.7238 | 0      |
|                                                |        | g_Lactobacillus.s_Lactobacillus_delbrueckii      | 0.4676 | 0.3564 | 0.1268 |
|                                                |        | g_Lactobacillus.s_Lactobacillus_helveticus       | 0.0948 | 0.1862 | 0.1292 |
|                                                |        | g_Lactobacillus.s_Lactobacillus_johnsonii        | 0.4482 | 0      | 0      |
|                                                |        | g_Lactobacillus.s_Lactobacillus_reuteri          | 6.1628 | 0.9264 | 3.9473 |
|                                                |        | g_Lactococcus.s_Lactococcus_lactis               | 0.6084 | 0.804  | 0.5567 |
|                                                |        | g_Lactococcus.s_Lactococcus_raffinolactis        | 0.1014 | 0.0338 | 0.1523 |
|                                                |        | g_Proteus.s_Proteus_mirabilis                    | 0.119  | 0.1044 | 0      |
|                                                |        | g_Staphylococcus.s_Staphylococcus_xylosus        | 0.5596 | 0.2146 | 0.4802 |
|                                                |        | g_Streptococcus.s_Streptococcus_thermophilus     | 0.4136 | 0.5112 | 0.1903 |
|                                                |        | K00133unclassified                               | 41.248 | 50.859 | 53.59  |
|                                                |        | K01586                                           | lysA   | K01586 | 38.817 |
| g_Alistipes.s_Alistipes_shahii                 | 0      |                                                  |        | 0.7548 | 0.1157 |
| g_Bacteroides.s_Bacteroides_thetaiotaomicron   | 6.4522 |                                                  |        | 7.8252 | 9.2933 |
| g_Corynebacterium.s_Corynebacterium_glutamicum | 0.2684 |                                                  |        | 2.9126 | 3.7507 |
| g_Enterorhabdus.s_Enterorhabdus_caecimuris     | 2.9884 |                                                  |        | 12.313 | 9.8052 |
| g_Escherichia.s_Escherichia_coli               | 0.3738 |                                                  |        | 0.5458 | 0      |
| g_Klebsiella.s_Klebsiella_pneumoniae           | 0      |                                                  |        | 0.1328 | 0      |
| g_Lactobacillus.s_Lactobacillus_helveticus     | 0.096  |                                                  |        | 0.1678 | 0.1272 |
| g_Lactobacillus.s_Lactobacillus_johnsonii      | 0.6244 |                                                  |        | 0      | 0.0615 |
| g_Lactobacillus.s_Lactobacillus_reuteri        | 6.708  |                                                  |        | 1.1092 | 4.5418 |
| g_Lactococcus.s_Lactococcus_lactis             | 0.3566 |                                                  |        | 0.526  | 0.5082 |
| g_Streptococcus.s_Streptococcus_thermophilus   | 0.0294 |                                                  |        | 0.0386 | 0      |
| K01586unclassified                             | 20.919 |                                                  |        | 23.278 | 29.784 |
| K00928                                         | lysC   | K00928                                           | 41.412 | 46.799 | 56.455 |
|                                                |        | g_Aerococcus.s_Aerococcus_viridans               | 0.0294 | 0.597  | 0.5892 |
|                                                |        | g_Bacteroides.s_Bacteroides_thetaiotaomicron     | 14.228 | 18.63  | 22.551 |
|                                                |        | g_Bacteroides.s_Bacteroides_uniformis            | 0      | 2.3614 | 0      |
|                                                |        | g_Bifidobacterium.s_Bifidobacterium_pseudolongum | 0.174  | 0.2262 | 1.0278 |
|                                                |        | g_Corynebacterium.s_Corynebacterium_glutamicum   | 0.2332 | 1.7858 | 2.5518 |
|                                                |        | g_Debaryomyces.s_Debaryomyces_hansenii           | 3.2358 | 1.9832 | 0.9733 |
|                                                |        | g_Enterococcus.s_Enterococcus_faecalis           | 0      | 0.1212 | 0.0883 |
|                                                |        | g_Enterorhabdus.s_Enterorhabdus_caecimuris       | 0.306  | 1.3368 | 0.8467 |



|              |                                                 |        |        |        |
|--------------|-------------------------------------------------|--------|--------|--------|
|              | g_Escherichia.s_Escherichia_coli                | 0.7822 | 0.568  | 0.07   |
|              | g_Klebsiella.s_Klebsiella_pneumoniae            | 0      | 0.4568 | 0      |
|              | g_Lactobacillus.s_Lactobacillus_delbrueckii     | 0.7094 | 0.7356 | 0.2455 |
|              | g_Lactobacillus.s_Lactobacillus_johnsonii       | 0.3528 | 0      | 0      |
|              | g_Lactobacillus.s_Lactobacillus_reuteri         | 6.7854 | 1.4384 | 3.7615 |
|              | g_Lactococcus.s_Lactococcus_lactis              | 0.7028 | 0.5982 | 0.6952 |
|              | g_Lactococcus.s_Lactococcus_raffinolactis       | 0.0318 | 0.1104 | 0.0497 |
|              | g_Meyerozyma.s_Meyerozyma_guilliermondii        | 0.0208 | 0      | 0      |
|              | g_Proteus.s_Proteus_mirabilis                   | 0      | 0.0572 | 0      |
|              | g_Staphylococcus.s_Staphylococcus_xylosum       | 0.5762 | 0.7504 | 0.2463 |
|              | g_Streptococcus.s_Streptococcus_thermophilus    | 0.6824 | 0.3104 | 0.3972 |
|              | K00928unclassified                              | 12.563 | 14.732 | 22.361 |
| K01714 dapA  | K01714                                          | 28.066 | 36.54  | 51.915 |
|              | g_Aerococcus.s_Aerococcus_viridans              | 0      | 0.6764 | 0.5543 |
|              | g_Bacteroides.s_Bacteroides_thetaiotaomicron    | 11.634 | 18.18  | 19.126 |
|              | g_Bacteroides.s_Bacteroides_uniformis           | 0      | 3.971  | 0      |
|              | g_Corynebacterium.s_Corynebacterium_glutamicum  | 0.4182 | 2.5316 | 4.281  |
|              | g_Enterococcus.s_Enterococcus_faecalis          | 0.0824 | 0      | 0.0735 |
|              | g_Escherichia.s_Escherichia_coli                | 0.2486 | 0.1224 | 0      |
|              | g_Klebsiella.s_Klebsiella_pneumoniae            | 0      | 0.1322 | 0      |
|              | g_Lactobacillus.s_Lactobacillus_delbrueckii     | 0.082  | 0.357  | 0.115  |
|              | g_Lactobacillus.s_Lactobacillus_helveticus      | 0      | 0.0378 | 0.0387 |
|              | g_Lactobacillus.s_Lactobacillus_johnsonii       | 0.2966 | 0      | 0.045  |
|              | g_Lactobacillus.s_Lactobacillus_reuteri         | 5.9464 | 1.415  | 3.5287 |
|              | g_Lactococcus.s_Lactococcus_lactis              | 0.4072 | 0.7288 | 0.6983 |
|              | g_Lactococcus.s_Lactococcus_raffinolactis       | 0      | 0.0428 | 0      |
|              | g_Leuconostoc.s_Leuconostoc_mesenteroides       | 0.0832 | 0.08   | 0.157  |
|              | g_Parabacteroides.s_Parabacteroides_goldsteinii | 2.364  | 1.7384 | 4.5512 |
|              | g_Proteus.s_Proteus_mirabilis                   | 0      | 0.0396 | 0      |
|              | g_Streptococcus.s_Streptococcus_thermophilus    | 0.4978 | 0.3222 | 0.444  |
|              | K01714unclassified                              | 6.0052 | 6.1644 | 18.301 |
|              | K01715                                          | 35.974 | 28.023 | 18.895 |
|              | K01715unclassified                              | 35.974 | 28.023 | 18.895 |
| K01929 murF  | K01929                                          | 41.55  | 20.062 | 42.17  |
|              | g_Aerococcus.s_Aerococcus_viridans              | 0      | 0.7658 | 0.5152 |
|              | g_Bacteroides.s_Bacteroides_thetaiotaomicron    | 6.5194 | 9.4642 | 10.324 |
|              | g_Enterococcus.s_Enterococcus_faecalis          | 0.0244 | 0.0528 | 0      |
|              | g_Escherichia.s_Escherichia_coli                | 0.6206 | 0.5564 | 0      |
|              | g_Lactobacillus.s_Lactobacillus_helveticus      | 0.0776 | 0.186  | 0.0218 |
|              | g_Lactobacillus.s_Lactobacillus_johnsonii       | 25.333 | 4.6164 | 17.951 |
|              | g_Lactobacillus.s_Lactobacillus_reuteri         | 8.4094 | 1.4412 | 4.3795 |
|              | g_Lactococcus.s_Lactococcus_lactis              | 0.4234 | 1.01   | 0.619  |
|              | g_Proteus.s_Proteus_mirabilis                   | 0.0242 | 0.045  | 0      |
|              | K01929unclassified                              | 0.118  | 1.924  | 8.361  |
| K03340 dapdh | K03340                                          | 18.123 | 34.288 | 32.028 |
|              | g_Bacteroides.s_Bacteroides_thetaiotaomicron    | 7.011  | 9.3464 | 9.7945 |
|              | g_Bacteroides.s_Bacteroides_uniformis           | 0      | 5.0378 | 0      |
|              | g_Corynebacterium.s_Corynebacterium_glutamicum  | 0.0406 | 1.7654 | 1.941  |
|              | g_Enterorhabdus.s_Enterorhabdus_caecimuris      | 2.04   | 8.4354 | 6.884  |
|              | K03340unclassified                              | 9.0316 | 9.7022 | 13.409 |

|                                     |        |           |                                                         |                                             |        |        |        |
|-------------------------------------|--------|-----------|---------------------------------------------------------|---------------------------------------------|--------|--------|--------|
| map00300_<br>Lysine<br>biosynthesis | K00215 | dapB      | K00215                                                  | 21.447                                      | 22.595 | 29.839 |        |
|                                     |        |           | <i>g__Aerococcus.s__Aerococcus_viridans</i>             | 0.0556                                      | 0.924  | 0.7383 |        |
|                                     |        |           | <i>g__Alistipes.s__Alistipes_shahii</i>                 | 0                                           | 0.233  | 0.1843 |        |
|                                     |        |           | <i>g__Bacteroides.s__Bacteroides_thetaiotaomicron</i>   | 8.2774                                      | 9.3716 | 10.894 |        |
|                                     |        |           | <i>g__Corynebacterium.s__Corynebacterium_glutamicum</i> | 0.0594                                      | 1.9278 | 1.8672 |        |
|                                     |        |           | <i>g__Enterococcus.s__Enterococcus_faecalis</i>         | 0.0946                                      | 0      | 0      |        |
|                                     |        |           | <i>g__Lactobacillus.s__Lactobacillus_delbrueckii</i>    | 0.1012                                      | 0.2544 | 0.2142 |        |
|                                     |        |           | <i>g__Lactobacillus.s__Lactobacillus_helveticus</i>     | 0.117                                       | 0.0554 | 0      |        |
|                                     |        |           | <i>g__Lactobacillus.s__Lactobacillus_johnsonii</i>      | 0.3856                                      | 0      | 0      |        |
|                                     |        |           | <i>g__Lactobacillus.s__Lactobacillus_reuteri</i>        | 7.5234                                      | 1.367  | 3.7917 |        |
|                                     |        |           | <i>g__Lactococcus.s__Lactococcus_lactis</i>             | 0.628                                       | 0.6092 | 1.0712 |        |
|                                     |        |           | <i>g__Lactococcus.s__Lactococcus_raffinolactis</i>      | 0                                           | 0      | 0.0927 |        |
|                                     |        |           | <i>g__Leuconostoc.s__Leuconostoc_mesenteroides</i>      | 0.0492                                      | 0.2258 | 0.1532 |        |
|                                     |        |           | <i>g__Staphylococcus.s__Staphylococcus_xylosum</i>      | 0.3292                                      | 0.3436 | 0.4272 |        |
|                                     |        |           | <i>g__Streptococcus.s__Streptococcus_thermophilus</i>   | 0.4202                                      | 0.6022 | 0.6665 |        |
|                                     |        |           | K00215unclassified                                      | 3.4068                                      | 6.6806 | 9.7398 |        |
|                                     |        | K00003    | hom                                                     | K00003                                      | 16.165 | 27.891 | 27.784 |
|                                     |        |           |                                                         | <i>g__Aerococcus.s__Aerococcus_viridans</i> | 0      | 0.7002 | 0.8585 |
|                                     |        |           |                                                         | <i>g__Alistipes.s__Alistipes_finegoldii</i> | 0      | 0      | 0.027  |
|                                     |        |           |                                                         | <i>g__Alistipes.s__Alistipes_shahii</i>     | 0      | 0.432  | 0.1365 |
|                                     |        |           | <i>g__Corynebacterium.s__Corynebacterium_glutamicum</i> | 0.1218                                      | 1.1428 | 1.9478 |        |
|                                     |        |           | <i>g__Debaryomyces.s__Debaryomyces_hansenii</i>         | 2.3396                                      | 2.6582 | 1.2353 |        |
|                                     |        |           | <i>g__Enterorhabdus.s__Enterorhabdus_caecimuris</i>     | 2.447                                       | 13     | 9.6028 |        |
|                                     |        |           | <i>g__Lactobacillus.s__Lactobacillus_helveticus</i>     | 0                                           | 0.0506 | 0      |        |
|                                     |        |           | <i>g__Lactobacillus.s__Lactobacillus_reuteri</i>        | 0                                           | 0      | 0.5792 |        |
|                                     |        |           | <i>g__Lactococcus.s__Lactococcus_lactis</i>             | 0.4134                                      | 0.8032 | 0.5787 |        |
|                                     |        |           | <i>g__Lactococcus.s__Lactococcus_raffinolactis</i>      | 0.0498                                      | 0      | 0.0268 |        |
|                                     |        |           | <i>g__Staphylococcus.s__Staphylococcus_xylosum</i>      | 0.6448                                      | 0.2758 | 0.2325 |        |
|                                     |        |           | K00003unclassified                                      | 10.149                                      | 8.8284 | 12.558 |        |
|                                     | K10206 | E2.6.1.83 | K10206                                                  | 21.687                                      | 27.558 | 19.168 |        |
|                                     |        |           | <i>g__Alistipes.s__Alistipes_shahii</i>                 | 0                                           | 0.6296 | 0.1665 |        |
|                                     |        |           | <i>g__Bacteroides.s__Bacteroides_uniformis</i>          | 0                                           | 4.606  | 0      |        |
|                                     |        |           | K10206unclassified                                      | 21.687                                      | 22.322 | 19.001 |        |
|                                     | K00821 | argD      | K00821                                                  | 13.514                                      | 20.002 | 26.123 |        |
|                                     |        |           | <i>g__Alistipes.s__Alistipes_shahii</i>                 | 0                                           | 0.7368 | 0.1152 |        |
|                                     |        |           | <i>g__Bacteroides.s__Bacteroides_thetaiotaomicron</i>   | 7.0554                                      | 9.112  | 10.156 |        |
|                                     |        |           | <i>g__Corynebacterium.s__Corynebacterium_glutamicum</i> | 0.1896                                      | 1.333  | 2.5198 |        |
|                                     |        |           | <i>g__Escherichia.s__Escherichia_coli</i>               | 0.3604                                      | 0.3116 | 0.1343 |        |
|                                     |        |           | <i>g__Klebsiella.s__Klebsiella_pneumoniae</i>           | 0                                           | 0.4712 | 0      |        |
|                                     |        |           | <i>g__Lactococcus.s__Lactococcus_lactis</i>             | 0.9546                                      | 0.2458 | 0.6285 |        |
|                                     |        |           | <i>g__Proteus.s__Proteus_mirabilis</i>                  | 0.028                                       | 0      | 0      |        |
|                                     |        |           | K00821unclassified                                      | 4.9258                                      | 7.7924 | 12.569 |        |
|                                     | K00841 | patA      | K00841                                                  | 30.026                                      | 7.79   | 18.909 |        |
|                                     |        |           | <i>g__Aerococcus.s__Aerococcus_viridans</i>             | 0.071                                       | 0.6902 | 0.9357 |        |
|                                     |        |           | <i>g__Lactobacillus.s__Lactobacillus_delbrueckii</i>    | 0.6366                                      | 1.104  | 0.1558 |        |
|                                     |        |           | <i>g__Lactobacillus.s__Lactobacillus_helveticus</i>     | 0.1288                                      | 0.0624 | 0.0868 |        |
|                                     |        |           | <i>g__Lactobacillus.s__Lactobacillus_johnsonii</i>      | 0.2646                                      | 0      | 0      |        |
|                                     |        |           | <i>g__Lactobacillus.s__Lactobacillus_reuteri</i>        | 28.004                                      | 5.3626 | 16.862 |        |
|                                     |        |           | <i>g__Lactococcus.s__Lactococcus_lactis</i>             | 0.8934                                      | 0.538  | 0.6658 |        |

|                                                |        |                                                |        |                                |        |        |        |
|------------------------------------------------|--------|------------------------------------------------|--------|--------------------------------|--------|--------|--------|
| K01439                                         | dapE   | g_Lactococcus.s_Lactococcus_raffinolactis      | 0.0274 | 0.0328                         | 0.2027 |        |        |
|                                                |        | K01439                                         | 19.207 | 12.939                         | 21.406 |        |        |
|                                                |        | g_Aerococcus.s_Aerococcus_viridans             | 0      | 1.6144                         | 1.0062 |        |        |
|                                                |        | g_Corynebacterium.s_Corynebacterium_glutamicum | 0.043  | 1.5468                         | 1.8247 |        |        |
|                                                |        | g_Enterorhabdus.s_Enterorhabdus_caecimuris     | 0.899  | 2.1234                         | 1.8375 |        |        |
|                                                |        | g_Escherichia.s_Escherichia_coli               | 0.3524 | 0.415                          | 0      |        |        |
|                                                |        | g_Klebsiella.s_Klebsiella_pneumoniae           | 0      | 0.2056                         | 0      |        |        |
|                                                |        | g_Lactobacillus.s_Lactobacillus_reuteri        | 17.006 | 2.6576                         | 9.3262 |        |        |
|                                                |        | K01439unclassified                             | 0.9064 | 4.3764                         | 7.4115 |        |        |
|                                                |        | K01778                                         | dapF   | K01778                         | 16.904 | 14.453 | 18.441 |
| g_Bacteroides.s_Bacteroides_thetaiotaomicron   | 6.8442 |                                                |        | 8.4572                         | 10.909 |        |        |
| g_Corynebacterium.s_Corynebacterium_glutamicum | 0.0524 |                                                |        | 1.0364                         | 2.042  |        |        |
| g_Enterococcus.s_Enterococcus_faecalis         | 0.0358 |                                                |        | 0.1284                         | 0      |        |        |
| g_Escherichia.s_Escherichia_coli               | 0.8902 |                                                |        | 0.6686                         | 0.0393 |        |        |
| g_Klebsiella.s_Klebsiella_pneumoniae           | 0      |                                                |        | 0.5576                         | 0      |        |        |
| g_Lactobacillus.s_Lactobacillus_delbrueckii    | 0.3412 |                                                |        | 0.2964                         | 0.068  |        |        |
| g_Lactobacillus.s_Lactobacillus_helveticus     | 0      |                                                |        | 0.1184                         | 0.062  |        |        |
| g_Lactobacillus.s_Lactobacillus_johnsonii      | 0.4992 |                                                |        | 0                              | 0      |        |        |
| g_Lactobacillus.s_Lactobacillus_reuteri        | 6.8962 |                                                |        | 1.1728                         | 3.4842 |        |        |
| K01928                                         | murE   | g_Proteus.s_Proteus_mirabilis                  | 0.0442 | 0.041                          | 0      |        |        |
|                                                |        | K01778unclassified                             | 1.3008 | 1.976                          | 1.8373 |        |        |
|                                                |        | K01928                                         | 19.163 | 9.9964                         | 17.375 |        |        |
|                                                |        | g_Aerococcus.s_Aerococcus_viridans             | 0.0266 | 1.3134                         | 1.108  |        |        |
|                                                |        | g_Alistipes.s_Alistipes_shahii                 | 0      | 0.6826                         | 0.1543 |        |        |
|                                                |        | g_Corynebacterium.s_Corynebacterium_glutamicum | 0.0502 | 1.5312                         | 2.3713 |        |        |
|                                                |        | g_Escherichia.s_Escherichia_coli               | 0.6924 | 0.6042                         | 0.1268 |        |        |
|                                                |        | g_Klebsiella.s_Klebsiella_pneumoniae           | 0      | 0.2932                         | 0      |        |        |
|                                                |        | g_Lactobacillus.s_Lactobacillus_delbrueckii    | 0.5772 | 0.2724                         | 0.1378 |        |        |
|                                                |        | g_Lactobacillus.s_Lactobacillus_helveticus     | 0.273  | 0.4306                         | 0.1082 |        |        |
| K00290                                         | LYS1   | g_Lactobacillus.s_Lactobacillus_reuteri        | 14.996 | 2.3492                         | 9.1427 |        |        |
|                                                |        | g_Lactococcus.s_Lactococcus_lactis             | 1.2474 | 0.8466                         | 0.9558 |        |        |
|                                                |        | g_Lactococcus.s_Lactococcus_raffinolactis      | 0      | 0.0874                         | 0.2435 |        |        |
|                                                |        | g_Leuconostoc.s_Leuconostoc_mesenteroides      | 0.1364 | 0.0726                         | 0.176  |        |        |
|                                                |        | K01928unclassified                             | 1.1648 | 1.5126                         | 2.849  |        |        |
|                                                |        | K00290                                         | 16.222 | 13.74                          | 13.792 |        |        |
|                                                |        | g_Debaryomyces.s_Debaryomyces_hansenii         | 2.412  | 2.017                          | 0.9733 |        |        |
|                                                |        | K00290unclassified                             | 13.81  | 11.723                         | 12.819 |        |        |
|                                                |        | K00674                                         | dapD   | K00674                         | 11.24  | 8.2086 | 14.229 |
|                                                |        |                                                |        | g_Alistipes.s_Alistipes_shahii | 0      | 0.4162 | 0.0833 |
| g_Corynebacterium.s_Corynebacterium_glutamicum | 0.1432 |                                                |        | 2.8768                         | 3.2083 |        |        |
| g_Escherichia.s_Escherichia_coli               | 0.8098 |                                                |        | 0.5548                         | 0      |        |        |
| g_Klebsiella.s_Klebsiella_pneumoniae           | 0      |                                                |        | 0.4468                         | 0      |        |        |
| g_Lactobacillus.s_Lactobacillus_reuteri        | 6.6706 |                                                |        | 1.2922                         | 3.5395 |        |        |
| g_Lactococcus.s_Lactococcus_lactis             | 0.9978 |                                                |        | 0.8358                         | 0.5453 |        |        |
| g_Leuconostoc.s_Leuconostoc_mesenteroides      | 0.1618 |                                                |        | 0                              | 0.1992 |        |        |
| g_Proteus.s_Proteus_mirabilis                  | 0      |                                                |        | 0.044                          | 0      |        |        |
| g_Streptococcus.s_Streptococcus_thermophilus   | 0.374  |                                                |        | 0.4174                         | 0.5787 |        |        |
| K05823                                         | dapL   | K00674unclassified                             | 2.0828 | 1.3242                         | 6.0753 |        |        |
|                                                |        | K05823                                         | 7.4398 | 3.0246                         | 4.5768 |        |        |
|                                                |        | g_Enterococcus.s_Enterococcus_faecalis         | 0      | 0                              | 0.0272 |        |        |
|                                                |        | g_Lactobacillus.s_Lactobacillus_delbrueckii    | 0.4076 | 0.453                          | 0.0292 |        |        |
|                                                |        | g_Lactobacillus.s_Lactobacillus_helveticus     | 0      | 0.0662                         | 0      |        |        |
|                                                |        | g_Lactobacillus.s_Lactobacillus_johnsonii      | 0.4052 | 0                              | 0      |        |        |
|                                                |        | g_Lactobacillus.s_Lactobacillus_reuteri        | 5.5078 | 1.133                          | 2.9673 |        |        |
|                                                |        | g_Lactococcus.s_Lactococcus_lactis             | 0.5432 | 0.5028                         | 0.8113 |        |        |
|                                                |        | g_Lactococcus.s_Lactococcus_raffinolactis      | 0      | 0.0322                         | 0.1083 |        |        |
|                                                |        | g_Leuconostoc.s_Leuconostoc_mesenteroides      | 0.066  | 0.2214                         | 0.1388 |        |        |
| g_Streptococcus.s_Streptococcus_thermophilus   | 0.51   | 0.6166                                         | 0.4948 |                                |        |        |        |

|        |           |                                                  |        |        |        |
|--------|-----------|--------------------------------------------------|--------|--------|--------|
| K01655 | LYS21, L  | K01655                                           | 6.0732 | 4.552  | 3.3823 |
|        |           | g__Debaryomyces.s__Debaryomyces_hansenii         | 5.639  | 3.2392 | 1.837  |
|        |           | K01655unclassified                               | 0.4342 | 1.3128 | 1.5453 |
| K12524 | thrA      | K12524                                           | 2.5816 | 4.299  | 4.9317 |
|        |           | g__Klebsiella.s__Klebsiella_pneumoniae           | 0      | 0.4652 | 0      |
|        |           | K12524unclassified                               | 2.5816 | 3.8336 | 4.9317 |
| K14267 | dapC      | K14267                                           | 0.0676 | 1.6422 | 7.1928 |
|        |           | g__Corynebacterium.s__Corynebacterium_glutamicum | 0.0676 | 1.258  | 1.5587 |
|        |           | K14267unclassified                               | 0      | 0.3842 | 5.634  |
| K00293 | LYS9      | K00293                                           | 2.825  | 2.4804 | 0.9558 |
|        |           | g__Debaryomyces.s__Debaryomyces_hansenii         | 2.825  | 2.4804 | 0.6867 |
|        |           | K00293unclassified                               | 0      | 0      | 0.2692 |
| K05824 | LYS12     | K05824                                           | 2.9884 | 1.8968 | 1.1403 |
|        |           | g__Debaryomyces.s__Debaryomyces_hansenii         | 2.9884 | 1.8968 | 1.1403 |
| K00838 | ARO8      | K00838                                           | 3.0582 | 1.7656 | 0.9483 |
|        |           | g__Debaryomyces.s__Debaryomyces_hansenii         | 3.0582 | 1.7656 | 0.9483 |
| K05822 | dapH, dap | K05822                                           | 1.934  | 0.5476 | 0.9953 |
|        |           | g__Enterococcus.s__Enterococcus_faecalis         | 0      | 0.067  | 0      |
|        |           | g__Lactobacillus.s__Lactobacillus_delbrueckii    | 0.0678 | 0.1182 | 0.1628 |
|        |           | g__Lactobacillus.s__Lactobacillus_helveticus     | 0      | 0.0658 | 0      |
|        |           | g__Lactobacillus.s__Lactobacillus_johnsonii      | 0.4224 | 0      | 0      |
|        |           | g__Staphylococcus.s__Staphylococcus_xylosum      | 1.106  | 0.2968 | 0.4125 |
|        |           | K05822unclassified                               | 0.3378 | 0      | 0.4198 |
| K05825 | LYSN      | K05825                                           | 0.3644 | 1.305  | 1.3328 |
|        |           | K05825unclassified                               | 0.3644 | 1.305  | 1.3328 |
| K12525 | metL      | K12525                                           | 0      | 0.2996 | 0      |
|        |           | g__Klebsiella.s__Klebsiella_pneumoniae           | 0      | 0.2996 | 0      |

**Supplementary Table 6. The model parameters of OPLS-DA in different comparative groups**

| <b>CD vs. HFD</b>  | <b>A</b> | <b>r2x</b> | <b>r2x(cum)</b> | <b>r2y</b> | <b>r2y(cum)</b> | <b>q2</b> | <b>q2(cum)</b> |
|--------------------|----------|------------|-----------------|------------|-----------------|-----------|----------------|
|                    | p1       | 0.235      | 0.235           | 0.868      | 0.868           | 0.694     | 0.694          |
|                    | o1       | 0.249      | 0.484           | 0.0977     | 0.0977          | 0.15      | 0.15           |
|                    | O2       | 0.0965     | 0.58            | 0.0211     | 0.119           | 0.0998    | 0.249          |
|                    | sum      |            | 0.58            |            | 0.986           |           | 0.943          |
| <b>HFD vs. FBT</b> | <b>A</b> | <b>r2x</b> | <b>r2x(cum)</b> | <b>r2y</b> | <b>r2y(cum)</b> | <b>q2</b> | <b>q2(cum)</b> |
|                    | p1       | 0.377      | 0.377           | 0.892      | 0.892           | 0.795     | 0.795          |
|                    | o1       | 0.262      | 0.639           | 0.0517     | 0.0517          | -0.0257   | -0.0257        |
|                    | sum      | NA         | 0.786           | NA         | 0.99            | NA        | 0.848          |
